# Supplementary material for: Waist Circumference Coupled with Either HDL-C or TG Can Be Used as a Diagnostic Marker for Metabolic Syndrome in Chinese Women with Polycystic Ovary Syndrome
Source: Int J Endocrinol. 2018 Sep 10;2018:6102085. doi: 10.1155/2018/6102085 (PMC6151373; doi:10.1155/2018/6102085)
Supplement: Supplementary Materials — We provide the datasets of our present study (PCOS and control patients). [file 6102085.f1.xlsx]

## Sheet: Controls
Name	WC	TG	HDL	SBP	DBP	FPG		age	weight	height	BMI	hip circumference	WHR	TT	DHEAS	TC	LDL	ApoA	ApoB	FINS	HOMA-IR	QUICK
杨春梅	70	0.83	2.06	100	75	5.08		36	49	1.59	19.3821	85	0.823529	0.45	213.3	8.59	6.15273	2.12	1.2	4.87	1.09954	0.377549
宋艳艳	78	0.41	1.31	121	71	5.76		33	65	1.65	23.8751	90	0.866667	0.52	126.8	4.34	2.84364	1.5	0.75	6.63	1.69728	0.352459
游前	68	0.47	1.74	121	70	4.43		33	50	1.67	17.9282	88	0.772727	0.35	211.5	5.48	3.52636	1.53	0.75	4.75	0.935222	0.387842
郑备红	75	0.54	1.22	105	60	4.68		39	52	1.6	20.3125	86	0.872093	0.33	198.2	4.29	2.82455	1.3	0.77	5.45	1.1336	0.375669
魏慧娟	65	0.6	1.55	110	68	4.23		28	45	1.6	17.5781	80	0.8125	0.34	87.3	5.41	3.58727	1.42	0.81	4.42	0.83096	0.395721
简美梅	74	0.93	1.23	105	65	4.67		28	50	1.58	20.0288	85	0.870588	0.37	299	3.99	2.33727	1.2	0.72	9.57	1.98631	0.344175
林锦秀	86	1.45	1.32	120	80	5.14		31	65	1.59	25.711	97	0.886598	0.22	121.6	4.59	2.61091	1.18	0.91	9.76	2.22962	0.338331
陈思爱	78	1.41	1.96	110	68	5.08		28	52	1.65	19.1001	87	0.896552	0.28	122.7	6.08	3.47909	1.68	0.99	2.49	0.562187	0.424208
池蓉	70	0.85	1.35	100	60	4.33		31	52	1.56	21.3675	93	0.752688	0.29	189.3	4.94	3.20364	1.5	0.79	8.24	1.58574	0.356165
林娟	85	0.39	1.8	100	60	4.76		29	72	1.54	30.3593	93	0.913978	0.43	219.2	4.47	2.49273	1.2	0.8	4.94	1.04508	0.380719
孙玲燕	75	0.59	1.57	110	72	3.75		28	50	1.56	20.5457	82	0.914634	0.19	134.4	3.74	1.90182	1.26	0.65	2.77	0.461667	0.440183
林燕斌	78	0.53	1.04	108	63	3.69		29	57	1.56	23.4221	90	0.866667	0.3	143.2	3.62	2.33909	1.12	0.63	1.92	0.31488	0.474924
林秀	82	0.52	1.3	100	60	4.83		28	65	1.58	26.0375	90	0.911111	0.49	351.3	3.99	2.45364	1.23	0.83	10.43	2.23897	0.338123
黄彩英	90	1.73	0.63	120	70	5.04		29	80	1.62	30.4832	101	0.891089	0.35	302.1	3.51	2.09364	1.36	0.72	17.8	3.9872	0.311709
黄颖（儿	72	0.31	1.65	100	60	4.93		27	55	1.62	20.9572	85	0.847059	0.34	169.5	3.54	1.74909	1.45	0.64	1.72	0.376871	0.457949
郑明慧（	76	0.95	1.77	109	70	4.17		29	56	1.53	23.9224	89	0.853933	0.3	179.7	4.88	2.67818	1.58	0.79	3.38	0.626427	0.415917
余莲芳	78	1.75	1.33	118	82	4.61		31	58	1.56	23.833	88	0.886364	0.37	175.8	4.08	1.95455	1.56	0.73	3.53	0.723258	0.405392
刘秋榆	74	0.73	1.3	120	80	4.51		28	55	1.6	21.4844	84	0.880952	0.12	15.8	3.97	2.33818	1.39	0.84	2.85	0.571267	0.422959
李艳艳	70	0.98	1.29	118	80	5.57		29	51	1.56	20.9566	85	0.823529	0.37	278.4	4.55	2.81455	1.2	0.76	8.72	2.15868	0.339946
陈玉香	75	0.71	1.05	115	80	4.11		32	59	1.6	23.0469	92	0.815217	0.19	110.5	3.92	2.54727	1.52	0.71	3.77	0.688653	0.408922
林惠琳	84	0.73	1.39	103	70	4.83		29	66	1.55	27.4714	86	0.976744	0.3	223.8	3.81	2.08818	1.22	0.64	5.61	1.20428	0.371999
郑秀珠	81	0.79	1.32	100	75	5.31		31	65	1.55	27.0552	88	0.920455	0.4	245.3	4.82	3.14091	1.02	1.03	3.76	0.88736	0.391304
林丽	83	1.6	1.31	110	70	4.79		27	67	1.66	24.3141	92	0.902174	0.3	245	4.36	2.32273	1.1	0.76	4.01	0.853684	0.393894
魏晓铭	80	1.03	0.96	120	75	4.82		33	62	1.58	24.8358	100	0.8	0.31	261.9	3.68	2.25182	1.02	0.68	4.9	1.04969	0.380443
张慧萱	70	0.78	1.46	100	65	5.35		31	53	1.58	21.2306	87	0.804598	0.26	200.7	3.42	1.60545	1.35	0.63	3.3	0.784667	0.399658
刘旭红	79	0.77	1.14	115	68	5.46		31	60	1.54	25.2994	89	0.88764	0.25	167.6	4.01	2.52	1.56	0.78	6.26	1.51909	0.358546
黄婴平	74	0.36	1.71	115	65	4.59		29	54	1.6	21.0937	89	0.831461	0.12	103.6	4.41	2.53636	1.6	0.69	6.34	1.29336	0.367759
黄明媛	77	1.05	1.04	104	63	4.42		29	56	1.6	21.875	89	0.865169	0.25	100.1	4.33	2.81273	1.11	0.87	2.75	0.540222	0.427345
陈丽娟	70	0.82	0.96	122	75	5.16		28	50	1.55	20.8117	92	0.76087	0.32	188.9	3.83	2.49727	1.14	0.62	4.69	1.07557	0.378918
王宛绵	82	1.58	1.73	114	68	4.22		30	65	1.6	25.3906	90	0.911111	0.46	124.1	6.77	4.32182	1.27	1.07	6.44	1.20786	0.37182
林颖	69	0.78	1.48	103	58	4.98		33	47	1.53	20.0777	79	0.873418	0.66	215	5.21	3.37545	2	0.7	3.44	0.761387	0.401758
肖文琴	82	0.84	0.95	117	72	5.08		28	60	1.54	25.2994	82	1	0.5	370.1	3.88	2.54818	1.5	0.66	3.17	0.715716	0.406142
卢海明	73	1.02	1.68	109	73	4.91		29	51	1.57	20.6905	91	0.802198	0.26	177.2	4.61	2.46636	1.43	0.78	5.11	1.11512	0.37668
李赐娟	76	1.6	1.65	129	71	5.49		30	54.5	1.58	21.8314	85	0.894118	0.49	176.5	4.8	2.42273	1.17	0.91	2.87	0.70028	0.40771
林勤	77	0.37	1.55	116	71	4.24		28	56	1.56	23.0112	82	0.939024	0.32	157.8	3.79	2.07182	1.07	0.74	2.24	0.422116	0.447851
黄燕桦	75	0.84	1.73	109	65	5.26		28	65	1.6	25.3906	87	0.862069	0.27	226.7	4.45	2.33818	1.35	0.78	5.16	1.20629	0.371898
章秀花	73	0.59	1.42	104	61	5.23		28	54	1.56	22.1893	85	0.858824	0.33	143.8	3.84	2.15182	1.6	0.6	2.71	0.629924	0.415499
苏君琴	72	0.42	1.91	129	78	4.88		31	55	1.63	20.7008	94	0.765957	0.29	273.4	3.96	1.85909	1.65	0.61	3.39	0.735253	0.404221
陈春花	78	0.58	1.77	94	57	4.52		30	62	1.62	23.6244	95	0.821053	0.51	109.7	5.37	3.33636	1.27	0.93	2.95	0.592622	0.420127
黄菊梅	73	1.42	1.23	106	73	4.54		28	56	1.62	21.3382	93	0.784946	0.69	202	4.79	2.91455	1.52	0.67	3.02	0.609369	0.418002
赵风清	75	0.8	1.63	102	62	5.55		33	60	1.6	23.4375	85	0.882353	0.37	301	4.51	2.51636	1.43	0.8	4.15	1.02367	0.382027
施晓茜	83	0.71	1.31	110	70	4.9		32	72	1.62	27.4348	88	0.943182	0.44	263.5	4.21	2.57727	1	0.87	4.24	0.923378	0.388676
陈英姿	85	0.51	1.35	114	73	4.55		24	70	1.54	29.5159	94	0.904255	0.55	309.1	4.05	2.46818	1	0.72	4.24	0.857422	0.3936
温美榕	83	0.87	1.08	119	75	4.24		29	57	1.56	23.4221	98	0.846939	0.21	90.1	3.67	2.19455	1.01	0.67	2.6	0.489956	0.435235
张玲玲	84	0.57	1.73	114	71	4.65		28	62	1.62	23.6244	101	0.831683	0.16	149	4.32	2.33091	1.14	0.67	4.31	0.890733	0.391052
陈幼桂	77	1.4	0.99	94	60	4.3		32	50	1.57	20.2848	90	0.855556	0.74	399.3	5.45	3.82364	1	0.67	7.26	1.38747	0.363679
瞿海彬	73	2.18	1.37	111	74	4.61		27	56	1.65	20.5693	92	0.793478	0.6	390.8	4.2	1.83909	1.22	0.57	3.55	0.727356	0.404989
陈玲	75	0.55	1.23	110	75	4.7		27	53	1.65	19.4674	88	0.852273	0.4	250.9	3.9	2.42	1.01	0.65	2.47	0.515956	0.431022
叶丽	77	0.88	1.55	95	65	4.38		29	55	1.59	21.7555	82	0.939024	0.27	208.24	4.25	2.3	1.33	0.6	2.62	0.510027	0.431957
黄爱玲	70	0.47	1.72	114	69	2.58		23	50	1.65	18.3655	89	0.786517	0.47	417.7	4.54	2.60636	1.16	0.7	3.98	0.456373	0.441155
潘丽霞	76	1.26	1.79	98	60	4.07		23	58	1.6	22.6562	89	0.853933	0.8	347.8	5.38	3.01727	1.26	1.06	4.91	0.888164	0.391244
潘雪红	75	0.66	2.18	102	59	3.14		33	51	1.58	20.4294	92	0.815217	0.39	214.7	6.02	3.54	1.29	0.75	5.06	0.706151	0.407108
林柳爱	63	0.74	1.48	110	68	4.72		22	43	1.54	18.1312	83	0.759036	0.34	202	3.45	1.63364	1.12	0.66	3.87	0.81184	0.39731
王甜甜	75	0.78	1.64	116	79	6.27		22	60	1.63	22.5827	94	0.797872	0.39	168	4.12	2.12545	1.23	0.78	4.91	1.36825	0.364482
余榕靖	61	1.39	1.58	114	72	5.24		23	55	1.6	21.4844	83	0.73494	0.3	159.2	4.95	2.73818	1.2	0.77	5.82	1.35541	0.365027
钟燕红	61	0.64	1.73	113	77	2.18		21	45	1.62	17.1468	87	0.701149	0.45	372.2	3.67	1.64909	1.19	0.53	4.5	0.436	0.445049
江声丽	70	0.54	1.57	110	85	4.92		23	54	1.59	21.3599	90	0.777778	0.29	326.1	4.08	2.26455	1.21	0.78	4.7	1.02773	0.381776
江丽春	70	1.35	1.52	120	80	4.27		24	52	1.6	20.3125	90	0.777778	0.25	112.3	4.41	2.27636	1.2	0.85	4.79	0.909036	0.389706
陈丹	80	0.82	1.78	118	70	4.21		22	56	1.59	22.151	89	0.898876	0.59	440.7	4.24	2.08727	1.31	0.59	5.01	0.937427	0.387688
吴小妹	78	0.44	1.65	114	65	6.07		23	59	1.59	23.3377	90	0.866667	0.36	315.6	4.42	2.57	1.6	0.67	5.03	1.35698	0.36496
谢旭萍	78	0.81	1.39	116	72	4.37		22	63	1.65	23.1405	98	0.795918	0.29	282.3	2.67	0.911818	1.54	0.41	5.21	1.0119	0.382762
徐静静	73	3.79	1.29	85	50	6.42		22	57	1.59	22.5466	92	0.793478	0.44	346.4	5.36	2.34727	1.13	0.9	4.97	1.41811	0.362429
严赛燕	68	0.59	1.6	123	78	5.16		22	52	1.7	17.9931	90	0.755556	0.42	301.2	3.49	1.62182	1.06	0.45	5.33	1.22235	0.371106
林玲	76	0.39	2.1	110	75	4.71		21	56	1.61	21.6041	87	0.873563	0.43	323.3	5	2.72273	1.29	0.71	4.21	0.881293	0.391761
卓小宁	76	0.46	1.61	122	71	2.83		22	56	1.62	21.3382	81	0.938272	0.78	562.2	3.36	1.54091	1.02	0.49	4.9	0.616311	0.417144
许丽婷	68	1.32	1.44	114	73	4.29		22	44	1.62	16.7657	85	0.8	0.48	187.2	3.74	1.7	1	0.52	5.23	0.997187	0.383696
黄文夏	70	0.81	1.77	114	60	4.05		21	50	1.61	19.2894	89	0.786517	0.43	245.5	4.61	2.47182	1.24	0.8	4.75	0.855	0.393791
温莲芳	68	0.38	1.35	117	64	5.36		23	43	1.62	16.3847	84	0.809524	0.45	256.8	4.54	3.01727	1.03	0.67	4.4	1.04818	0.380533
郭金珠	68	0.42	1.84	119	78	3.65		22	49	1.58	19.6283	88	0.772727	0.49	214.6	4.54	2.50909	1.33	0.77	4.86	0.7884	0.399329
张艳金	72	0.6	1.64	101	67	3.91		22	50	1.55	20.8117	93	0.774194	0.44	259	3.45	1.53727	1.18	0.8	3.91	0.679471	0.409899
许莹	71	0.46	1.2	116	79	4.68		21	53	1.61	20.4467	93	0.763441	0.18	146.5	3.39	1.98091	0.89	0.67	6.95	1.4456	0.361337
张丽	80	0.62	1.45	105	72	4.9		22	65	1.66	23.5883	95	0.842105	0.18	127.3	4.18	2.44818	1.25	1.12	8.27	1.80102	0.349287
林美兰	76	0.55	1.63	113	77	4.75		22	55	1.59	21.7555	89	0.853933	0.45	306.9	3.3	1.42	0.99	0.48	8.49	1.79233	0.349544
苏金露	75	0.43	1.12	110	85	5.02		22	53	1.61	20.4467	91	0.824176	0.26	206.6	3.23	1.91455	1.45	0.78	8.78	1.95892	0.344891
张进	68	0.55	2	120	80	3.3		21	44	1.55	18.3143	85	0.8	0.72	423.6	4.59	2.34	2	0.67	0.88	0.129067	0.581981
郑秀钗	72	0.92	1.51	118	70	5.27		22	59	1.66	21.4109	90	0.8	0.57	318.9	3.36	1.43182	1.45	0.6	5.79	1.35615	0.364995
范素明	63	0.84	1.61	114	70	4.9		22	48	1.5	21.3333	80	0.7875	0.36	196.2	4.18	2.18818	1.7	0.69	2.81	0.611956	0.41768
朱小春	76	0.34	1.98	116	67	5.03		22	60	1.65	22.0386	80	0.95	0.52	377	3.96	1.82545	1.52	0.89	5.67	1.26756	0.368946
李菲	80	0.46	1.63	85	50	5.68		22	66	1.58	26.4381	91	0.879121	0.33	147.1	4.14	2.30091	1.45	0.86	7.25	1.83022	0.348437
赵金凤	76	0.44	1.32	123	78	4.64		23	58	1.6	22.6562	98	0.77551	0.25	137	3.32	1.8	1.35	0.89	4.64	0.956871	0.386353
陈玉珍	76	1.11	1.46	110	75	5.12		21	50	1.5	22.2222	88	0.863636	0.31	77.3	3.53	1.56545	1.15	0.77	4.64	1.05586	0.380075
黄慧芬	60	0.5	1.85	122	71	5.1		20	40	1.56	16.4366	78	0.769231	0.49	197	4.12	2.04273	1.3	0.69	7.34	1.66373	0.353539
詹敏	80	0.78	1.56	115	73	4.79		21	56	1.58	22.4323	90	0.888889	0.3	100.3	4.51	2.59545	1.29	0.79	6.78	1.44339	0.361423
熊雯	78	0.55	1.54	114	60	5.1		22	57	1.65	20.9366	89	0.876404	0.46	308.6	3.39	1.6	1	0.6	2.79	0.6324	0.415205
郑丹	58	0.73	1.3	117	64	4.77		22	42	1.58	16.8242	82	0.707317	0.63	226.6	3.38	1.74818	1	0.72	5.67	1.20204	0.37211
李浩娟	72	0.44	1.82	119	80	4.9		23	57	1.62	21.7193	93	0.774194	0.3	187.9	4.21	2.19	1.56	0.89	6.34	1.38071	0.36396
胡淼	73	0.53	1.6	101	67	5.1		23	60	1.62	22.8624	90	0.811111	0.4	305.6	3.48	1.63909	1.31	0.6	2.97	0.6732	0.410577
林泓	66	1.44	1.52	116	79	4.21		21	44	1.59	17.4044	80	0.825	0.49	330.6	4.33	2.15545	1	0.78	3.39	0.634307	0.41498
肖艳平	65	1.52	1.85	114	72	4.72		23	49	1.59	19.3821	87	0.747126	0.23	144.5	6.26	3.71909	1.43	1.09	4.99	1.04679	0.380617
许小梅	70	0.73	2.19	113	77	5.51		23	51	1.55	21.2279	80	0.875	0.15	158.2	5.13	2.60818	1.57	0.84	3.67	0.898742	0.390459
林开添	75	1.2	1.38	110	85	4.16		29	53	1.54	22.3478	82	0.914634	0.51	311.2	4.19	2.26455	1.13	0.62	4.75	0.878222	0.391994
李夏莲	82	2.82	0.86	120	80	5.36		33	70	1.54	29.5159	90	0.911111	0.4	199.1	4.56	2.41818	1.28	1.04	4.33	1.0315	0.381545
魏灵灵	78	0.8	1.69	118	70	4.22		24	63	1.57	25.5588	86	0.906977	0.49	156	4.95	2.89636	1.05	0.63	2.55	0.478267	0.43723
郭华燕	78	0.6	1.34	114	65	4.89		25	56	1.55	23.3091	85	0.917647	0.74	265.5	4.35	2.73727	1.12	0.65	3.59	0.780227	0.400052
吴茜琳	75	0.56	1.98	116	67	4.85		26	55	1.6	21.4844	88	0.852273	0.46	153.1	4.02	1.78545	1.84	0.75	6.56	1.41404	0.362592
潘文娟	80	0.78	1.26	85	50	4.09		33	63	1.56	25.8876	93	0.860215	0.53	166	5.11	3.49545	1.04	0.64	2.3	0.418089	0.448687
陈亦巧	78	3.31	0.79	123	78	4.48		25	60	1.6	23.4375	85	0.917647	0.24	117.8	4.76	2.46545	1.5	1.11	6.89	1.37188	0.364329
舒旭莲	79	0.66	1.36	110	75	4.54		25	50	1.53	21.3593	92	0.858696	0.5	215	3.22	1.56	0.92	0.51	4.44	0.895893	0.390669
陈雪周	74	0.91	1.29	122	73	4.58		32	55	1.52	23.8054	83	0.891566	0.57	175	4.7	2.99636	1.14	0.68	3.83	0.779618	0.400106
洪锦秀	77	1.23	1.67	114	73	4.15		33	57	1.55	23.7253	81	0.950617	0.48	199.8	3.86	1.63091	0.97	0.64	3.25	0.599444	0.419251
余婷	76	0.65	1.33	114	60	4.31		23	60	1.6	23.4375	85	0.894118	0.75	151.8	3.06	1.43455	1	0.6	6.03	1.15508	0.374522
欧辉	82	0.91	1.07	117	66	3.6		24	64	1.58	25.6369	86	0.953488	0.69	286.9	3.88	2.39636	1.05	0.61	4.93	0.7888	0.399294
陈婷婷	65	0.52	1.28	119	78	5.09		23	60	1.58	24.0346	76	0.855263	0.34	217.3	3.93	2.41364	1.12	0.6	4.97	1.12432	0.376174
徐素芳	81	0.46	1.41	101	67	4.2		25	60	1.52	25.9695	87	0.931034	0.51	162.6	3.74	2.12091	0.78	0.39	2.55	0.476	0.437625
林华	62	1.89	1.53	116	79	4.44		26	58	1.6	22.6562	85	0.729412	0.43	163	4.88	2.49091	1.18	0.86	3.04	0.599893	0.419194
吴秋丽	82	0.8	1.09	114	72	4.23		23	70	1.63	26.3465	88	0.931818	0.51	217.2	3.92	2.46636	1.09	0.65	3.78	0.71064	0.406652
倪瑞兰	73	0.54	0.91	113	77	4.35		24	56	1.63	21.0772	90	0.811111	0.53	136	3.56	2.40455	0.85	0.5	3.82	0.738533	0.403906
陈琴云	68	0.82	1.57	110	85	3.83		26	58	1.7	20.0692	86	0.790698	0.23	120.1	4.74	2.79727	1.06	0.61	1.61	0.274058	0.488927
林文琴	67	0.83	1.19	120	80	3.69		24	52	1.6	20.3125	76	0.881579	0.1	56.4	4.69	3.12273	1.04	0.72	2.62	0.42968	0.446309
李姜	64	0.63	1.05	118	70	3.18		29	58	1.58	23.2335	82	0.780488	0.59	364.4	4.18	2.84364	0.98	0.53	7.44	1.05152	0.380333
林嵘	70	0.56	1.09	114	65	4.41		33	55	1.55	22.8928	83	0.843373	0.53	157.2	3.78	2.43545	0.81	0.55	3.06	0.59976	0.419211
郑晓霜	64	0.89	1.31	116	67	3.68		23	54	1.6	21.0937	88	0.727273	0.37	174.7	3.85	2.13545	1.01	0.6	21.55	3.52462	0.317001
陈丽珠	76	0.74	1.41	85	50	3.78		23	47	1.6	18.3594	88	0.863636	0.45	154.3	4.45	2.70364	0.94	0.57	2.73	0.45864	0.440737
陈晓明	71	1.12	1.06	123	78	3.98		25	48	1.55	19.9792	87	0.816092	0.33	126.5	4.9	3.33091	0.98	0.65	2.32	0.410382	0.45032
邓秋红	64	0.61	1.49	110	76	4.5		24	44	1.58	17.6254	82	0.780488	0.43	130.6	3.75	1.98273	1.14	0.65	3	0.6	0.419181
罗小琼	77	0.89	1.22	122	71	4.55		35	56	1.59	22.151	90	0.855556	0.41	220.5	3.95	2.32545	1.03	0.6	4.48	0.905956	0.38993
王清莉	67	0.32	1.68	114	73	4.32		24	47	1.57	19.0677	89	0.752809	0.36	153.9	4.13	2.30455	0.81	0.51	4.18	0.80256	0.3981
黄秀珠	67	0.63	1.42	114	60	3.94		26	45	1.55	18.7305	88	0.761364	0.53	322	3.91	2.20364	0.99	0.46	1.9	0.332711	0.469589
李秀平	70	0.93	1.2	117	68	3.81		27	46	1.55	19.1467	87	0.804598	0.48	240.7	3.93	2.30727	0.91	0.55	3.63	0.61468	0.417344
陈莹	63	0.65	1.7	119	78	4.12		27	48	1.63	18.0662	85	0.741176	0.37	198.7	6.19	4.19455	1.22	0.77	2.48	0.454116	0.441575
刘希熙	78	0.92	1.51	101	67	4.2		29	59	1.6	23.0469	92	0.847826	0.27	116.2	5.06	3.13182	1.55	0.94	7.03	1.31227	0.366908
李丽华	63	0.89	1.39	85	50	3.85		23	42	1.58	16.8242	74	0.851351	0.4	89.6	5.31	3.51545	1.26	0.78	6.04	1.03351	0.381422
李淑珍	80	0.48	1.01	125	78	4.4		25	66	1.6	25.7812	85	0.941176	0.52	164.2	3.62	2.39182	0.92	0.54	3.22	0.629689	0.415527
刘文雅	73	1.1	1.03	110	75	5.07		24	50	1.55	20.8117	87	0.83908	0.49	215.5	3.67	2.14	1.01	0.65	11.86	2.67245	0.329558
陈玲敏	65	0.74	0.91	122	71	4.33		23	48	1.63	18.0662	84	0.77381	0.53	248.9	3.33	2.08364	0.96	0.51	4.47	0.860227	0.393381
张萍	70	0.67	1.4	114	73	4.08		24	50	1.58	20.0288	88	0.795455	0.52	179.3	3.62	1.91545	1	0.65	8.02	1.45429	0.360997
付晓林	68	1.22	1.06	117	60	4.54		25	48	1.58	19.2277	87	0.781609	0.71	133	4.31	2.69545	1.04	0.58	3.08	0.621476	0.416514
余仙容	73	0.73	1.56	117	64	4.23		29	55	1.62	20.9572	80	0.9125	0.51	179.3	3.83	1.93818	0.83	0.57	10.34	1.94392	0.345288
阮妙芳	80	0.73	1.15	120	78	4.71		22	60	1.58	24.0346	88	0.909091	0.47	145.6	5.6	4.11818	1.01	0.61	6.27	1.31252	0.366897
张芳淼	62	0.64	1.38	101	67	4.73		24	55	1.52	23.8054	88	0.704545	0.47	169	4.86	3.18909	1.04	0.71	2.67	0.561293	0.424332
倪玲玲	73	0.77	1.3	103	64	4.28		28	53	1.61	20.4467	91	0.802198	0.48	235	4.29	2.64	1	0.6	3.03	0.576373	0.422269
徐宝珍	70	0.58	1.29	118	78	4.86		24	52	1.63	19.5717	87	0.804598	0.67	191.8	3.59	2.03636	1.05	0.6	1.33	0.28728	0.484083
王霞芳	76	0.61	0.96	120	70	3.78		28	60	1.6	23.4375	82	0.926829	0.3	103.8	3.59	2.35273	0.87	0.52	2.05	0.3444	0.466305
林娟	70	0.64	1.07	114	56	3.6		30	50	1.54	21.0828	76	0.921053	0.66	160.4	3.57	2.20909	1.1	0.65	3.31	0.5296	0.428926
林平	74	1.37	1.14	121	83	4.28		27	50	1.55	20.8117	82	0.902439	0.54	161.7	3.5	1.73727	1.03	0.6	2.6	0.494578	0.434463
刘玉香	78	0.98	1.35	120	71	3.81		23	55	1.56	22.6003	85	0.917647	0.51	217.3	3.97	2.17455	0.65	0.65	5.04	0.85344	0.393914
陈世芳	63	0.69	1.65	111	61	4.43		25	43	1.57	17.4449	75	0.84	0.62	308.2	4.27	2.30636	0.92	0.52	7.8	1.53573	0.357939
黄梦莉	85	0.76	0.96	134	85	3.6		29	69	1.65	25.3444	94	0.904255	0.51	166.4	3.8	2.49455	1.12	0.65	2.4	0.384	0.456249
桂亚林	75	0.85	1.44	110	75	4.87		23	55	1.62	20.9572	83	0.903614	0.7	164.3	4.12	2.29364	0.92	0.54	5.2	1.12551	0.376109
黄蓉蓉	65	1.57	1.3	122	71	5.01		28	48	1.58	19.2277	82	0.792683	0.5	212.4	5.49	3.47636	1.13	0.91	3.58	0.797147	0.398566
林娜	84	0.57	1.32	115	73	4.73		25	70	1.62	26.6728	92	0.913043	0.5	201.7	4.28	2.70091	1.04	0.65	2.25	0.473	0.438151
李欧敏	69	1.86	1.21	114	60	5.04		25	52	1.6	20.3125	85	0.811765	0.47	281.4	5.11	3.05455	1.16	0.95	17.54	3.92896	0.312331
林霞	81	0.76	1.29	117	64	4.42		26	68	1.57	27.5873	90	0.9	0.51	225.7	3.52	1.88455	1.2	0.65	6.53	1.28278	0.368242
林燕	68	0.74	0.96	119	78	4.28		30	55	1.62	20.9572	90	0.755556	0.56	110.5	4.19	2.89364	1.17	0.62	5.43	1.03291	0.381459
王春平	80	0.91	1.29	101	67	4.31		25	61	1.62	23.2434	92	0.869565	0.51	260.2	4.15	2.44636	1.04	0.59	5.26	1.00758	0.383034
杨晓清	61	0.79	1.4	85	50	4.11		30	50	1.58	20.0288	82	0.743902	0.65	211.8	4.15	2.39091	0.98	0.64	2.38	0.434747	0.445297
陈丽钦	64	0.62	1.3	123	78	4.42		29	48	1.62	18.2899	75	0.853333	0.44	231	4.05	2.46818	1.18	0.6	5.26	1.0333	0.381435
黄珊	68	0.7	1.52	110	75	3.31		28	53	1.62	20.1951	83	0.819277	0.56	365.7	3.78	1.94182	1.02	0.6	1.89	0.27804	0.487433
罗玉星	72	0.57	1.06	122	71	4.8		25	56	1.6	21.875	82	0.878049	0.45	371.4	3.48	2.16091	0.68	0.43	3.05	0.650667	0.413084
陈琼	70	0.6	1.13	114	73	3.93		29	49	1.59	19.3821	85	0.823529	0.23	342.1	3.15	1.74727	1.14	0.65	5.6	0.978133	0.384933
俞秀玲	78	0.77	0.99	114	60	4.15		29	65	1.65	23.8751	90	0.866667	0.28	122.7	3.6	2.26	1.06	0.52	2.49	0.459267	0.440622
俞晓燕	82	1.27	1.35	117	64	4.34		30	66	1.55	27.4714	88	0.931818	0.29	189.3	5.94	4.01273	1.11	0.78	8.24	1.5894	0.356038
卞燕	75	1.02	1.04	123	78	4.7		25	52	1.6	20.3125	86	0.872093	0.43	219.2	3.76	2.25636	0.94	0.55	4.94	1.03191	0.38152
陈春	65	0.6	1.51	110	75	3.94		24	58	1.6	22.6562	80	0.8125	0.19	134.4	5.72	3.93727	1.05	0.63	2.77	0.485058	0.436063
陈美玲	74	1.24	1.3	122	71	4.32		23	53	1.58	21.2306	85	0.870588	0.3	143.2	3.58	1.71636	1.18	0.65	1.92	0.36864	0.459969
蔡淑红	86	0.82	1.14	132	78	4.57		25	63	1.58	25.2363	97	0.886598	0.49	351.3	3.64	2.12727	1.02	0.6	10.43	2.11845	0.340893
程青	78	0.7	1.24	119	78	4.51		24	52	1.65	19.1001	87	0.896552	0.35	302.1	4.23	2.67182	0.94	0.58	16.3	3.26724	0.320345
洪娟	78	1.24	1.03	101	67	4.77		23	57	1.56	23.4221	93	0.83871	0.1	56.4	4.47	2.87636	1.03	0.69	2.62	0.55544	0.425153
黄乐	75	0.97	1.34	85	50	4.23		23	55	1.6	21.4844	86	0.872093	0.59	364.4	4.67	2.88909	1	0.61	7.44	1.39872	0.363216
林文婷	75	0.92	1.32	123	78	5.05		22	50	1.56	20.5457	82	0.914634	0.53	157.2	5.05	3.31182	1.11	0.72	3.06	0.6868	0.409118
方雪娟	82	1.07	1.05	110	75	4.48		22	70	1.56	28.764	90	0.911111	0.37	157.2	3.66	2.12364	1.04	0.57	21.55	4.29084	0.308642
黄颖	80	0.71	1.08	122	71	3.79		30	60	1.58	24.0346	90	0.888889	0.45	136.8	4.03	2.62727	0.92	0.54	2.73	0.459853	0.440514
陈淑君	84	0.5	1.59	114	73	4.35		25	70	1.62	26.6728	101	0.831683	0.34	87.3	3.62	1.80273	1.12	0.65	4.42	0.854533	0.393827
薛瑞云	72	0.76	1.1	114	60	4.94		31	52	1.62	19.8141	85	0.847059	0.37	299	4.25	2.80455	1.2	0.63	9.57	2.10115	0.341307
林豆	73	1.17	1.52	122	71	4.43		22	48	1.53	20.5049	89	0.820225	0.22	121.6	4.32	2.26818	1.02	0.62	9.76	1.92164	0.345886
彭秀玲	79	0.74	1.41	114	73	4.61		28	56	1.56	23.0112	88	0.897727	0.56	122.7	3.61	1.86364	1.26	0.65	2.49	0.510173	0.431933
郭世华	90	0.84	1.13	126	85	4.45		31	67	1.59	26.5021	97	0.927835	0.29	189.3	5.11	3.59818	1.04	0.86	8.24	1.62969	0.354665
黄婷	78	0.55	1.6	120	65	4.71		29	56	1.65	20.5693	87	0.896552	0.43	219.2	3.89	2.04	0.83	0.42	4.94	1.03411	0.381385
王捷婷	89	1.19	1.6	125	86	4.38		25	65	1.56	26.7094	93	0.956989	0.27	134.4	4.37	2.22909	1.15	0.65	4.76	0.926613	0.388447
张若冰	83	0.92	1.4	110	75	4.58		25	62	1.6	24.2187	90	0.922222	0.3	143.2	2.75	0.931818	0.74	0.35	1.92	0.390827	0.454661
林宏烨	80	0.71	1.38	122	71	4.6		24	54	1.6	21.0937	85	0.941176	0.49	351.3	3.53	1.82727	1	0.6	10.43	2.13236	0.340563
陈小云	83	0.57	1.35	114	73	4.09		37	64	1.64	23.7954	90	0.922222	0.65	145.7	3.93	2.32091	0.95	0.51	7.9	1.43604	0.361713
卓青	82	0.65	1.18	114	60	4.38		27	63	1.57	25.5588	88	0.931818	0.54	189.3	3.98	2.50455	0.73	0.46	8.5	1.65467	0.353836
曾枫玲	70	0.9	1.38	117	64	4.27		28	49	1.59	19.3821	85	0.823529	0.37	337.8	4.29	2.50091	0.99	0.6	4.36	0.827431	0.39601
陈文玉	78	1.16	1.9	119	78	4.02		32	65	1.65	23.8751	90	0.866667	0.53	213.69	3.44	1.01273	1	0.65	4.47	0.79864	0.398437
张玲琳	68	0.7	1.35	101	67	3.72		25	55	1.62	20.9572	88	0.772727	0.95	231.57	4.79	3.12182	1.23	0.68	5.06	0.836587	0.395262
周小娟	75	0.56	1.29	103	64	4.84		27	58	1.57	23.5304	86	0.872093	0.22	178.1	4.25	2.70545	0.82	0.6	3.62	0.778702	0.400188
吴冬平	78	0.92	0.9	118	78	4.28		33	72	1.6	28.125	80	0.975	0.19	80.9	3.6	2.28182	1.19	0.65	5.38	1.0234	0.382044
黄程琳	74	0.76	1.35	108	70	4.72		24	50	1.58	20.0288	85	0.870588	0.59	75.6	3.23	1.53455	0.78	0.52	6.4	1.34258	0.365578
许维丹	90	0.74	1.3	114	73	4.94		29	67	1.59	26.5021	97	0.927835	0.33	178.2	4.23	2.59364	0.73	0.6	5.29	1.16145	0.374188
程海琳	78	1.2	1.45	114	60	4.65		25	64	1.65	23.5078	87	0.896552	0.56	291.2	3.86	1.86455	0.9	0.48	4.79	0.989933	0.384163
陈丽艳	89	0.69	1.51	117	68	4.55		24	65	1.56	26.7094	93	0.956989	0.65	145.6	4.95	3.12636	1.12	0.68	4.25	0.859444	0.393442
王海燕	75	0.85	1.59	119	78	4.62		23	55	1.6	21.4844	86	0.872093	0.43	219.6	5.21	3.23364	1.05	0.66	3.6	0.7392	0.403842
陈秀贞	75	1.05	1.46	101	67	3.96		23	50	1.56	20.5457	82	0.914634	0.33	297.1	3.87	1.93273	0.97	0.49	3.23	0.56848	0.42334
吴沁媛	78	0.73	1.22	103	79	3.88		25	48	1.56	19.7239	90	0.866667	0.67	374.1	3.67	2.11818	0.91	0.5	4.23	0.72944	0.404785
马桃英	80	0.73	1.17	114	72	4.49		24	60	1.58	24.0346	90	0.888889	0.49	180.4	3.23	1.72818	0.91	0.44	3.86	0.770284	0.400945
王丽敏	84	3.94	1.35	113	85	5.36		30	70	1.62	26.6728	101	0.831683	0.43	266.4	6.2	3.05909	1.39	1.22	4.95	1.1792	0.373268
邓巧玲	76	0.66	1.57	110	77	4.29		26	55	1.62	20.9572	85	0.894118	0.54	343.7	4.42	2.55	1.08	0.65	5.21	0.993373	0.383941
谢云英	78	0.54	1.42	90	65	4.74		24	54	1.53	23.0681	89	0.876404	0.64	219.6	4.85	3.18455	1	0.5	3.87	0.81528	0.39702
黄丽丽	89	0.69	1.54	118	70	4.38		29	72	1.65	26.4463	92	0.967391	0.73	196.5	4.16	2.30636	1.02	0.64	3.67	0.714427	0.406271
赖小云	82	1.61	1.58	114	73	4.06		28	70	1.6	27.3437	92	0.891304	0.19	134.4	4.51	2.19818	1.09	0.65	4.7	0.848089	0.394338
杨冰冰	83	1.25	1.7	114	60	4.19		26	63	1.65	23.1405	90	0.922222	0.3	143.2	4.69	2.42182	1.02	0.61	5.67	1.05588	0.380074
范丽娇	78	3.16	2.14	117	64	5.16		26	59	1.59	23.3377	82	0.95122	0.56	135.8	6.44	2.86364	1.6	0.97	11.45	2.62587	0.33039
林巧玲	74	0.61	2.05	119	78	4.8		24	59	1.65	21.6713	89	0.831461	0.67	302.1	4.96	2.63273	1.18	0.65	15.3	3.264	0.320389
柯慧军	76	1.14	1.03	101	67	4.32		21	56	1.57	22.719	85	0.894118	0.46	223.5	4.91	3.36182	1.2	0.84	9.67	1.85664	0.347683
陈勤心	85	0.62	1.15	116	79	4.45		33	72	1.58	28.8415	90	0.944444	0.56	156.3	3.85	2.41818	0.9	0.52	5.34	1.05613	0.380059
陈影	84	0.95	1.33	114	72	3.93		24	70	1.6	27.3437	94	0.893617	0.17	77.3	3.55	1.78818	1.02	0.62	1.22	0.213093	0.516522
林霞	80	0.92	1.56	113	77	4.76		26	66	1.62	25.1486	85	0.941176	0.62	157.1	4.32	2.34182	1.17	0.72	5.06	1.07047	0.379214
戴小梅	74	0.46	1.41	100	65	4.86		26	48	1.58	19.2277	94	0.787234	0.35	284.6	3.74	2.12091	0.78	0.39	4.2	0.9072	0.38984
邓巧玲	70	0.66	1.57	100	60	3.12		26	50	1.59	19.7777	80	0.875	0.72	211.7	4.42	2.55	1.08	0.65	4.29	0.59488	0.419836
程青	76	0.7	1.34	106	66	3.09		24	58	1.6	22.6562	88	0.863636	0.39	233.1	4.23	2.57182	0.94	0.58	4.51	0.619373	0.41677

## Sheet: PCOS总
name	WC	TG	HDL	SBP	DBP	FPG		age	weight	height	BMI	hip circumference	WHR	TT	DHEAS	TC	LDL	ApoA	ApoB	FINS	HOMA-IR	QUICK
黄均	76	1	0.95	100	70	4.69		33	50	1.54	21.0828	86.5	0.878613	1	127.6	4.39	2.98545	1.12	0.83	11.88	2.47632	0.333193
黄桂芳	98.5	1.99	0.78	121	87	6.16		26	80	1.69	28.0102	101	0.975248	0.85	391.4	5.57	3.88545	1.3	0.99	24.02	6.57614	0.291934
林丽花	87	1.57	1.16	121	85	4.71		33	67	1.58	26.8386	94	0.925532	0.8	356.2	4.48	2.60636	1.19	0.78	12.57	2.63132	0.330291
范晓婕	86	0.86	1.05	105	60	3.62		27	60	1.58	24.0346	98	0.877551	0.9	291.2	3.45	2.00909	1.01	0.63	8.7	1.39973	0.363174
陈宝英	106	0.65	1.14	110	68	4.81		27	76	1.6	29.6875	107	0.990654	0.66	145.6	4.94	3.50455	1.74	1.05	17.69	3.78173	0.313957
吴素珍	84	1.56	1.02	105	65	5.46		28	54	1.55	22.4766	92	0.913043	1.16	219.6	4.57	2.84091	1.58	0.99	27.97	6.78739	0.290769
温跃青	90	1.36	1.05	120	80	4.1		30	65	1.6	25.3906	98	0.918367	0.87	297.1	5.14	3.47182	1.45	1.1	12.26	2.23404	0.338232
张小燕	85	1.15	0.99	110	70	5.15		26	63	1.6	24.6094	97	0.876289	0.87	374.1	4.32	2.80727	1.34	0.79	12.71	2.90918	0.325603
吴如洪	80	1.02	0.87	100	60	4.69		27	50	1.58	20.0288	89	0.898876	1.62	180.4	3.87	2.53636	1.91	0.7	6.77	1.41117	0.362709
沈云	104	2.44	0.93	100	60	4.71		31	75	1.55	31.2175	109	0.954128	0.83	266.4	4.98	2.94091	1.26	1.01	11.99	2.50991	0.332545
林淑君	82	0.87	1.21	110	70	4		26	63	1.62	24.0055	91	0.901099	1.55	343.7	3.32	1.71455	1.35	0.62	8.06	1.43289	0.361838
陈颖	75	1.07	0.99	108	63	4.29		21	55	1.68	19.487	88	0.852273	0.84	289.2	3.58	2.10364	1.2	0.64	5.71	1.08871	0.378162
陈章琴	78	0.59	1.68	100	60	4.04		26	53	1.56	21.7784	90	0.866667	2.61	427.7	3.62	1.67182	1.2	0.65	2.13	0.382453	0.456614
林慧冬	76	0.9	1.39	120	70	5.02		25	65	1.7	22.4913	85	0.894118	2.49	278.5	5.77	3.97091	1.82	0.96	3.22	0.718418	0.405872
林升	82	0.8	1.42	100	93	4.64		20	65	1.62	24.7676	97	0.845361	0.84	448.1	4.98	3.19636	2.21	0.86	5.06	1.04348	0.380816
丁宁	80	0.58	1.14	100	70	4.65		27	66	1.58	26.4381	96	0.833333	1.2	497.4	4.99	3.58636	1.44	1.01	16.95	3.503	0.317269
潘美英	76	0.68	1.79	118	82	5.03		24	56	1.65	20.5693	89	0.853933	1.31	210	5.26	3.16091	1.1	0.99	6.52	1.45758	0.360869
卢娟	80	2.76	0.98	120	80	5.15		27	54	1.53	23.0681	90	0.888889	0.86	145.6	5.55	3.31545	1.02	0.95	8.17	1.87002	0.347306
张玲玲	77	1.41	1.1	115	72	4.74		28	54	1.6	21.0938	87	0.885057	1.03	209.4	6.15	4.40909	1.3	0.97	5.52	1.16288	0.374113
吴芳	85	0.52	2.19	110	73	5.2		22	63	1.6	24.6094	97	0.876289	0.49	262.6	5.95	3.52364	1.82	0.91	4.14	0.9568	0.386358
李讷	82	1.03	1.87	110	70	4.85		25	63	1.62	24.0055	91	0.901099	1.55	160.2	5.11	2.77182	1.86	0.8	5.2	1.12089	0.376362
陈爱娇	69	1.24	0.92	110	70	4.46		27	46	1.52	19.91	78	0.884615	1.05	244	4.93	3.44636	1.31	0.86	7.93	1.5719	0.356649
吕莺	77	1.77	1.32	120	70	4.18		31	60	1.68	21.2585	94	0.819149	0.97	380.4	5.5	3.37545	1.66	0.97	4.91	0.912169	0.389479
李玲玲	85	0.5	1.24	115	92	5.04		23	62	1.58	24.8358	94	0.904255	1.08	135.7	4.17	2.70273	1.07	0.81	7.27	1.62848	0.354706
兰榕军	81	1.51	1.62	118	80	4.62		27	59	1.6	23.0469	95	0.852632	1.18	241.1	5.96	3.65364	1.94	0.93	9.4	1.93013	0.345657
郑秀英	90	1.07	1.97	115	80	3.7		33	71.5	1.57	29.0073	95	0.947368	1.38	386.6	4.5	2.04364	1.58	0.68	10.32	1.69707	0.352466
张晓华	91	0.82	1.67	100	60	5.79		32	66	1.6	25.7812	100	0.91	1.2	250.8	6.13	4.08727	1.48	1.16	17.6	4.52907	0.306423
卢湘玉	86	2.23	0.97	100	70	5.07		31	72.5	1.63	27.2874	96	0.895833	0.81	416.8	5.33	3.34636	1.2	1.08	12.29	2.76935	0.327887
郑桂香	80	1.84	1.14	110	70	4.47		27	58	1.59	22.9421	88	0.909091	0.9	319	4.34	2.36364	1.17	0.76	5.44	1.08075	0.378619
王舒婷	90	0.84	1.18	120	75	5.03		20	66	1.55	27.4714	100	0.9	0.68	220.9	5.17	3.60818	1.01	0.78	12.77	2.8548	0.326474
曾巧玲	73	1.36	1.72	100	65	4.38		25	55	1.6	21.4844	85	0.858824	0.76	192.2	5.03	2.69182	1.7	0.84	5.75	1.11933	0.376447
赵晓芳	75	0.57	1.79	115	65	4.49		32	54	1.6	21.0938	87	0.862069	1.12	189.1	3.65	1.60091	1.56	0.58	4.31	0.860084	0.393392
施成	73	0.3	1.57	115	65	5.1		20	63	1.66	22.8625	101	0.722772	1.01	233.1	3.75	2.04364	1.41	0.6	5.15	1.16733	0.373881
林立	83	1.16	0.9	104	63	3.97		26	57	1.48	26.0226	89	0.932584	0.81	173	5.94	4.51273	1.51	1.01	11.84	2.0891	0.341598
陈丽玉	70	0.34	1.77	122	75	4.42		22	48.5	1.59	19.1844	86	0.813953	1.29	266	4.64	2.71545	1.56	0.78	2.3	0.451822	0.442004
张勤	84	1.9	1.24	125	75	4.73		30	67.5	1.64	25.0967	99	0.848485	0.76	273.8	4.99	2.88636	1.56	0.93	6.31	1.3265	0.366278
陈艺莹	81	2.09	1.39	110	70	4.64		28	53	1.5	23.5556	88	0.920455	0.78	228.3	6.62	4.28	1.69	1.18	18.11	3.73468	0.314494
张春梅	83	1.4	1.23	133	86	4.89		26	65	1.59	25.711	95	0.873684	0.87	262.2	4.03	2.16364	1.09	0.88	8.6	1.86907	0.347333
陈美香	65	1.45	1.45	96	63	4.69		26	45	1.6	17.5781	84	0.77381	1.04	203.3	5.32	3.21091	1.54	0.78	5.92	1.23399	0.37054
薛烨	75	1.29	1.5	116	76	5.53		27	56	1.63	21.0772	87	0.862069	0.8	301	3.89	1.80364	1.23	0.71	7.09	1.74256	0.351044
林珠金	73	0.43	1.55	124	79	4.82		27	50	1.48	22.8269	89	0.820225	1.08	152	5.07	3.32455	1.54	0.95	3.91	0.837609	0.395179
黄晓丹	80	1.47	1.27	131	83	4.47		24	60	1.61	23.1473	92	0.869565	1.5	472.4	5.57	3.63182	1.58	1.04	7.59	1.50788	0.358961
陈炎清	72	0.54	2.08	136	72	4.86		24	52	1.65	19.1001	85	0.847059	0.47	159.4	4	1.67455	1.47	0.63	6.55	1.4148	0.362562
林淋	64	0.44	1.17	119	70	4.69		21	48	1.58	19.2277	84	0.761905	0.78	167.4	4.39	3.02	1.18	0.74	9.78	2.03859	0.342843
郑静薇	97	1.38	1.54	119	82	5.15		22	66	1.7	22.8374	107	0.906542	0.9	315	3.24	1.07273	1.27	0.72	13.25	3.03278	0.323698
魏建萍	81	1.36	1.01	118	71	5.23		28	63	1.58	25.2363	95	0.852632	0.89	308.1	3.38	1.75182	1.04	0.69	8.72	2.02692	0.343137
孙惠娟	95	2	1.34	115	70	5.29		25	92	1.7	31.8339	109	0.87156	0.81	240.5	5.62	3.37091	1.24	1	23.59	5.54627	0.298378
孙丽英	65	1.22	1.8	126	60	4.94		22	45	1.56	18.4911	83	0.783133	1.13	420	4.64	2.28545	1.6	0.96	4.59	1.00776	0.383023
沈珊	78	0.64	2.33	125	60	4.85		34	57	1.56	23.4221	95	0.821053	0.75	336.1	5.11	2.48909	1.88	0.88	8.34	1.79773	0.349384
王华琴	73	1.92	1.45	120	82	4.81		26	60	1.67	21.5139	91	0.802198	0.85	242	4.94	2.61727	1.26	0.89	8.3	1.77436	0.350079
林雨露	69	0.75	2	113	68	5.22		23	49	1.55	20.3954	85	0.811765	0.2	191	5.04	2.69909	2	0.78	3.24	0.75168	0.402659
何风云	90	1.05	2.8	127	80	4.06		22	78	1.65	28.6501	107	0.841121	1.31	222.7	6.14	2.86273	2.24	0.97	6.47	1.16748	0.373873
蔡小兰	85	1.72	1.44	131	80	4.16		28	65	1.7	22.4913	95	0.894737	1.15	295.2	5.05	2.82818	1.5	0.98	11.41	2.10958	0.341105
许建华	75	0.53	1.8	110	70	4.78		30	60	1.65	22.0386	87	0.862069	0.98	347.7	4.06	2.01909	1.41	0.6	3.11	0.660702	0.411953
陈凤舟	76	1.22	1.17	115	75	4.15		30	57	1.62	21.7193	85	0.894118	1.25	344.9	4.95	3.22545	1.03	0.9	4.57	0.842911	0.394752
江霞	80	0.6	1.21	106	73	4.35		26	64	1.68	22.6757	92	0.869565	0.4	173.2	5.4	3.91727	1.17	1.01	6.78	1.3108	0.366974
陈四兰	77	0.7	1.8	102	62	4.69		30	57	1.63	21.4536	91	0.846154	2.01	200.1	6.16	4.04182	1.6	0.63	11.74	2.44714	0.333766
唐文婷	66	0.8	1.62	110	70	4.42		23	47	1.6	18.3594	81	0.814815	1	389.6	3.44	1.45636	1.01	0.54	4.27	0.838818	0.395082
柯素云	80	2.22	1.12	114	73	4.33		27	58	1.56	23.833	95	0.842105	0.96	239.1	4.83	2.70091	1.11	0.85	7.96	1.53186	0.35808
林娜	73	0.96	1.54	119	73	4.5		25	45	1.52	19.4771	82	0.890244	1.12	385.1	5.17	3.19364	1.23	0.82	8.98	1.796	0.349435
曾于弼	73	0.6	1.15	114	71	4.97		30	47	1.58	18.8271	87	0.83908	0.6	241	5.64	4.21727	1.04	0.68	4.87	1.07573	0.378909
胡丽珠	66	0.7	1.64	94	60	5.12		27	41.5	1.58	16.6239	83	0.795181	1.2	361.9	5.17	3.21182	1.18	0.64	6.34	1.4427	0.36145
施恩	79	0.88	1.38	111	74	5.13		31	52	1.57	21.0962	89	0.88764	0.41	353.4	5.61	3.83	1.18	0.77	5.98	1.36344	0.364685
卢琳	73	0.69	1.01	110	75	4.37		22	52	1.57	21.0962	87	0.83908	0.78	265.3	4.31	2.98636	1.01	0.72	4.11	0.798253	0.398471
陈微	72	0.72	1.33	95	65	4.12		25	46.5	1.54	19.607	86	0.837209	0.87	411.8	4.78	3.12273	1.23	0.71	2.13	0.390027	0.454845
林霞	78	1.38	1.13	114	69	5.03		30	55	1.54	23.1911	85	0.917647	0.94	146.7	5	3.24273	1.03	0.78	4.38	0.979173	0.384865
陈梦莹	64	0.69	1.57	98	60	3.88		21	50	1.6	19.5312	84	0.761905	0.79	190.4	3.89	2.00636	1.21	0.55	1.53	0.26384	0.492903
刘依妹	66	0.57	1.3	102	59	4.36		38	50	1.53	21.3593	83	0.795181	0.82	195.4	4.09	2.53091	1.14	0.62	6.95	1.34676	0.365398
郑婷婷	68	0.62	1.27	110	80	4.46		26	55	1.65	20.202	96	0.708333	1.6	82.1	4.18	2.62818	1.11	0.61	4.29	0.850373	0.394156
王晓英	88	1.77	0.94	131	83	4.61		21	71	1.55	29.5525	98	0.897959	1.24	150.6	4.16	2.41545	0.97	0.75	12.03	2.46481	0.333418
林吓丽	69	0.4	1.32	129	88	3.13		21	42.5	1.54	17.9204	81	0.851852	1.11	323.7	4.28	2.77818	1.09	0.58	9.36	1.30208	0.367364
魏婷婷	63	0.56	1.41	105	71	4.47		23	46.5	1.61	17.9391	84	0.75	1.22	349.8	4.47	2.80545	1.15	0.61	3.14	0.623813	0.416231
吴小轩	67	0.5	1.23	108	68	4.37		21	44	1.52	19.0443	81	0.82716	0.48	155.2	4.08	2.62273	1.07	0.61	2.65	0.514689	0.43122
陈依妹	82	1.82	1.17	108	77	4.75		35	64	1.63	24.0882	97	0.845361	0.58	242.3	4.38	2.38273	1.09	0.79	12.14	2.56289	0.331545
黄嫩梅	69	2.79	0.95	115	65	5.4		27	51	1.6	19.9219	82	0.841463	0.59	202.3	3.76	1.54182	1.02	0.75	5.13	1.2312	0.370675
陈新颖	80	0.48	1.45	121	72	4.61		20	63	1.64	23.4236	95	0.842105	1.08	182.8	4	2.33182	1.07	0.62	2.07	0.42412	0.447439
阮茜	78	1.67	1.5	112	80	4.64		29	53.5	1.57	21.7047	92	0.847826	1.18	382.5	6.29	4.03091	1.01	0.96	10.77	2.22101	0.338523
姜妍妍	77	0.57	1.16	120	80	4.3		27	59	1.72	19.9432	91	0.846154	1.37	336.4	3.91	2.49091	1.05	0.59	3.05	0.582889	0.4214
丘玉清	82	2.66	1.3	140	85	6.59		28	61	1.56	25.0657	94	0.87234	0.72	293.5	6.41	3.90091	1.11	0.94	21.56	6.31468	0.293444
林喜雪	69	1.74	1.35	103	67	4.61		33	49	1.56	20.1348	80	0.8625	0.41	485.5	5.66	3.51909	1.01	0.88	2.98	0.610569	0.417852
丁雅华	74	1.24	1.58	104	71	4.45		27	54	1.62	20.5761	92	0.804348	1.23	235.9	5.32	3.17636	1	0.77	2.46	0.486533	0.435812
李丹楠	82	1.19	1.51	116	79	4.32		29	56	1.61	21.6041	91	0.901099	0.88	357.9	6.31	4.25909	1	0.9	5.95	1.1424	0.375196
曾肖岩	69	1.01	1.67	114	72	3.29		30	49	1.66	17.782	83	0.831325	0.91	457.9	4.5	2.37091	1.09	0.69	5.98	0.874409	0.392285
元美玲	81	1.11	1.77	113	77	4.44		23	64	1.63	24.0882	94	0.861702	0.88	487.9	4.71	2.43545	1.13	0.63	13.46	2.65611	0.329848
卢丽峰	110	2.47	1.61	110	85	4.49		31	83	1.7	28.7197	120	0.916667	0.86	105.9	4.89	2.15727	1.78	0.89	12.7	2.53436	0.33208
李林妹	67	0.86	1.7	120	80	3.84		24	47	1.55	19.563	81	0.82716	0.95	352	5.23	3.13909	1.1	0.7	0.68	0.116053	0.598046
陈晶晶	71	0.82	1.78	118	70	3.59		20	54	1.64	20.0773	93	0.763441	1.36	729.7	4.36	2.20727	1.17	0.57	8.75	1.39611	0.363323
刘娟娟	75	0.54	1.49	114	65	4.84		28	59	1.65	21.6713	91	0.824176	0.31	326	3.67	1.93455	1.04	0.52	10.1	2.17262	0.339623
陈小青	75	1.24	1.53	116	67	5.03		28	56	1.55	23.3091	88	0.852273	1.19	426	5.47	3.37636	0.91	0.76	17.15	3.83398	0.313371
陈爱清	63	1.09	1.29	85	50	3.68		30	44	1.6	17.1875	79	0.797468	0.91	137.1	3.42	1.63455	0.97	0.54	3.16	0.516836	0.430885
林丹娜	75	1.47	1.04	123	78	4.85		20	59	1.62	22.4813	95	0.789474	1.13	515	5.15	3.44182	1	0.79	16.28	3.50924	0.317192
卓小英	102	2.37	1.09	110	75	4.49		28	84	1.65	30.854	112	0.910714	1.52	306.6	4.21	2.04273	1.1	0.77	9.96	1.98757	0.344142
郑国玉	75	1.03	1.96	122	71	4.79		38	58	1.55	24.1415	88	0.852273	1.01	239.8	6.66	4.23182	1.45	1.2	3.05	0.649311	0.413239
肖玉贞	86	1.58	1.33	114	73	4.76		34	57	1.48	26.0226	95	0.905263	0.99	430.5	5.33	3.28182	1.09	1.16	6.88	1.4555	0.36095
许美容	78	0.67	1.38	114	60	5.62		26	60.5	1.6	23.6328	90	0.866667	0.66	342.7	3.96	2.27545	1.24	0.82	4.97	1.2414	0.370183
郑洲	78	0.52	1.62	117	64	4.05		29	52	1.58	20.83	90	0.866667	0.99	275.8	3.91	2.05364	1.18	0.73	8.57	1.5426	0.357691
郑梅琴	75	1.73	1.34	119	78	4.14		28	50.5	1.57	20.4876	84	0.892857	0.44	433.2	5.72	3.59364	1.01	1.03	12.41	2.28344	0.337149
潘燕萍	85	1.72	1.22	101	67	3.95		28	67	1.6	26.1719	96	0.885417	0.84	146.8	4.82	2.81818	1.13	1.01	14.32	2.51396	0.332468
王滢滢	90	0.62	1.19	130	80	5.45		24	70	1.67	25.0995	94	0.957447	0.74	394.3	3.2	1.72818	1	0.69	15.75	3.815	0.313583
胡佳茜	78	1.08	1.66	103	66	3.99		23	60.5	1.62	23.0529	90	0.866667	1.75	432.5	5.49	3.33909	1.24	0.97	4.54	0.805093	0.397883
何娟娟	75	0.74	1.22	98	61	5.08		27	55	1.57	22.3133	88	0.852273	0.76	452.4	3.32	1.76364	1.1	0.75	4.14	0.93472	0.387877
尤金菊	77	0.7	1.93	127	88	3.91		25	54	1.6	21.0938	90	0.855556	1.36	315.5	4.49	2.24182	1.17	0.79	6.93	1.20428	0.371999
杨秀焰	110	1.02	1.2	118	71	2.56		27	71	1.59	28.0843	115	0.956522	1.1	341.1	5.34	3.67636	0.87	1.06	8.69	0.988729	0.384241
蔡首燕	111	1.01	1.13	114	68	4.44		24	79	1.67	28.3266	124	0.895161	0.5	252.5	4.5	2.91091	0.83	0.94	10.42	2.05621	0.342404
林冰娜	67	1.61	1.36	100	68	4.23		30	50	1.53	21.3593	81	0.82716	0.84	336.7	4.76	2.66818	0.84	1.03	8.27	1.55476	0.357255
林雪芬	77	1.31	1.59	130	82	4.13		26	58.5	1.55	24.3496	89	0.865169	1.03	296.9	5.51	3.32455	1.36	1.02	9.24	1.69605	0.352498
徐华	80	1.2	1.58	119	80	4.03		30	57	1.56	23.4221	90	0.888889	1.09	354.8	4.96	2.83455	1.34	0.85	10.95	1.96127	0.344829
吴敏	75	1.58	1.28	107	63	4.59		22	55	1.62	20.9572	85	0.882353	1.06	567.4	4.82	2.82182	0.83	0.84	13.49	2.75196	0.328181
周倩	59	0.72	1.56	116	71	4.61		22	46	1.52	19.91	81	0.728395	0.79	287.7	3.52	1.63273	1.01	0.54	3.96	0.81136	0.397351
王云钦	64	0.53	1.43	120	84	4.9		24	39	1.53	16.6603	79	0.810127	0.75	304.5	4.06	2.38909	0.9	0.69	3.32	0.723022	0.405415
赵苏	74	1.03	1.53	101	69	3.81		27	61.5	1.61	23.7259	89	0.831461	1.26	416.7	6.43	4.43182	1.47	0.91	2.21	0.374227	0.458592
陈秋榕	79	1.28	1.29	110	63	4.68		27	58.5	1.53	24.9904	92	0.858696	1.33	536.4	4.2	2.32818	1.03	0.88	6.1	1.2688	0.368888
林雍	86	1.28	1.04	138	92	4.97		32	85.5	1.66	31.0277	107	0.803738	0.82	143.1	4.27	2.64818	1.57	0.75	14.05	3.10349	0.322653
程华莺	77	1.45	0.96	121	74	6.95		26	73	1.67	26.1752	97	0.793814	0.89	215.7	4.5	2.88091	0.83	0.94	16.7	5.15844	0.301207
林琼珊	61	0.67	1.2	95	62	4.68		25	49	1.56	20.1348	83	0.73494	0.81	373.1	4.61	3.10545	1.56	0.76	5.29	1.10032	0.377505
陈淑娟	89	2.87	0.83	112	79	4.65		26	76	1.62	28.959	104	0.855769	1.04	160.41	5.39	3.25545	1.6	1.05	14.91	3.0814	0.322976
张莹	66	1.03	1.24	109	78	4.51		27	50.5	1.62	19.2425	88	0.75	1.13	375.7	3.84	2.13182	1.34	0.6	5.22	1.04632	0.380645
陈柳珠	68	0.89	1.1	121	87	4.12		27	45.5	1.5	20.2222	78	0.871795	1.04	224.6	3.43	1.92545	1.26	0.55	2.09	0.382702	0.456555
郑晓烨	68	0.8	1.29	106	69	3.32		20	57	1.7	19.7232	84	0.809524	0.66	295.8	4.01	2.35636	1.31	0.61	3.85	0.568089	0.423393
赖玉琴	99	1.56	0.91	109	71	4.87		34	70	1.6	27.3438	108	0.916667	0.65	138.2	4.14	2.52091	1.6	0.75	4.09	0.885258	0.391462
吴美选	70	1.92	1.43	123	76	4.62		27	51	1.58	20.4294	86	0.813953	1.15	279.7	5.41	3.10727	1.75	0.89	5.08	1.04309	0.380839
柳小青	64	1.38	1.24	108	71	4.33		23	50	1.55	20.8117	77	0.831169	0.75	373.9	4.08	2.21273	1.31	0.68	4.92	0.946827	0.387038
林美艳	61	0.48	1.39	124	74	3.88		27	43	1.53	18.369	79	0.772152	1.05	235.9	4.85	3.24182	1.34	0.71	3.47	0.598382	0.419387
汪文玲	88	1.5	0.99	123	63	5.15		22	78	1.65	28.6501	105	0.838095	0.78	361.1	4.07	2.39818	1.41	0.64	12.81	2.93207	0.325243
周波弟	62	0.76	1.53	123	72	4.01		27	43	1.56	17.6693	76	0.815789	1.09	158.4	4.02	2.14455	1.27	0.62	1.06	0.188916	0.530864
郭宝贞	80	0.96	1.16	119	77	5.46		35	60.5	1.55	25.1821	91	0.879121	1.02	535.4	4	2.40364	1.41	0.65	5.67	1.37592	0.36416
胡雅娟	67	0.62	1.23	117	71	4.38		28	58	1.58	23.2335	89	0.752809	0.91	260.7	3.64	2.12818	1.13	0.61	3.34	0.650187	0.413139
李晓英	73	2.89	1.74	125	80	3.8		28	59.5	1.53	25.4176	89	0.820225	0.92	262.1	5.23	2.17636	1	1.18	7.54	1.27342	0.368673
蔡敏璇	84	0.89	0.97	105	71	3.74		22	74.4	1.62	28.3493	99	0.848485	0.78	157.1	3.84	2.46545	1.39	0.61	19.66	3.26793	0.320335
刘秀敏	66	1.3	1.36	116	68	4.97		27	43.6	1.51	19.122	83	0.795181	0.78	229.3	4.62	2.66909	1.47	0.72	17.2	3.79929	0.313759
李文梅	76	1.29	1.54	102	72	4.57		29	49	1.57	19.8791	87	0.873563	0.8	384.8	4.49	2.36364	1.05	0.77	2.4	0.487467	0.435654
江碧辉	85	2.14	0.88	121	78	4.98		25	69	1.55	28.7201	96	0.885417	0.72	219.8	5.52	3.66727	1.6	0.97	10.75	2.37933	0.335131
黄晓萍	76	0.53	1.92	120	70	4.38		33	47.5	1.6	18.5547	90	0.844444	1.08	318.2	4.17	2.00909	1	0.6	1.12	0.218027	0.513884
魏丽娇	88	0.81	1.46	113	79	4.77		33	74	1.69	25.9095	103	0.854369	0.9	277.8	5	3.17182	1.09	0.79	3.71	0.78652	0.399494
林燕	71	0.78	1.28	106	76	4.51		27	47.5	1.54	20.0287	86	0.825581	0.84	202.2	5.01	3.37545	1.11	0.85	0.42	0.0841867	0.652444
吕淑艳	87	2.68	1.43	108	64	5.94		29	64	1.59	25.3155	97	0.896907	1.43	246.5	5.38	2.73182	1.2	0.61	16.67	4.40088	0.307598
林晨舒	106	1.03	1.21	121	76	4.64		24	85	1.72	28.7317	120	0.883333	0.92	384.4	6.69	5.01182	1.35	1.06	6.9	1.42293	0.362235
何青青	71	0.75	1.38	122	72	4.57		20	55	1.67	19.721	86	0.825581	1.1	346.4	5.17	3.44909	1.13	0.82	6.52	1.32428	0.366376
谢铃影	67	0.38	1.41	114	76	5.36		28	50	1.52	21.6413	86	0.77907	1.47	432.2	4.57	2.98727	1.06	0.72	8.33	1.98439	0.344224
付顺莲	62	0.68	1.09	91	57	4.54		20	43	1.55	17.898	82	0.756098	0.31	134.5	3.2	1.80091	0.9	0.48	2.66	0.536729	0.427861
林花田	61	0.5	1.5	116	67	4.25		22	49	1.66	17.782	83	0.73494	1.35	472.7	5.56	3.83273	0.88	0.75	3.74	0.706444	0.407078
陈英英	82	0.74	1.22	123	85	5.06		24	59	1.63	22.2063	90	0.911111	0.74	429.2	4.11	2.55364	1.08	0.64	10.42	2.34334	0.335876
王倩	56	0.55	1.46	116	75	4.4		25	56	1.6	21.875	68	0.823529	0.92	386	4.15	2.44	0.94	0.7	10.24	2.00249	0.343758
黄海燕	73	1.32	1.06	110	57	4.37		26	49	1.5	21.7778	85	0.858824	0.4	266.1	5.51	3.85	1.31	1	6.42	1.24691	0.36992
兰兰香	93	0.72	1.45	114	66	5.04		24	72	1.62	27.4348	95	0.978947	0.87	167.9	4.86	3.08273	1.04	0.74	12.89	2.88736	0.32595
杨帆	84	0.84	1.07	116	85	4.61		28	74	1.6	28.9062	102	0.823529	0.72	437.9	4.28	2.82818	1.16	0.7	17.71	3.62858	0.315737
卓美娇	90	0.98	1.52	119	77	3.84		20	71	1.63	26.7229	95	0.947368	1.55	363.3	4.7	2.73455	1.1	0.77	4.65	0.7936	0.398874
张沁心	82	0.71	1.13	112	77	4.34		20	65	1.63	24.4646	89	0.921348	1.39	552.5	4.33	2.87727	0.95	0.72	10.65	2.05427	0.342453
吴舒均	80	1.96	1.22	119	80	4.27		21	65	1.62	24.7676	89	0.898876	1.01	743.5	4.76	2.64909	1.14	0.86	6.2	1.17662	0.3734
陈妹妹	90	2.28	0.67	108	67	4.19		30	69.5	1.6	27.1484	92	0.978261	1.05	160.4	4.22	2.51364	1.14	0.87	24.12	4.49168	0.306761
赖婷婷	90	1.46	1.62	110	78	4.5		30	70	1.58	28.0404	93	0.967742	0.75	155.6	4.63	2.34636	0.99	0.7	5.63	1.126	0.376082
林小平	80	0.97	1.14	105	76	6.6		28	60	1.62	22.8624	87	0.91954	0.7	88.5	5.32	3.73909	1.15	1.15	16.49	4.83707	0.303763
翁秀华	67	0.62	1.97	120	86	4.9		24	47	1.55	19.563	78	0.858974	0.72	336.9	5.83	3.57818	1.12	0.78	3.66	0.797067	0.398573
温小兰	82	2.35	0.97	120	80	3.42		31	58	1.56	23.833	88	0.931818	1.03	215.5	4.11	2.07182	1.64	0.76	5.62	0.85424	0.39385
郑玲	74	1.13	2.35	117	76	6.14		29	48	1.55	19.9792	82	0.902439	0.45	195.3	6.14	3.27636	1.31	1.03	4.94	1.34807	0.365341
乔宇	87	1.17	1.13	107	56	4.79		30	60	1.6	23.4375	90	0.966667	0.83	160	5.63	3.96818	1.2	0.92	23.87	5.08166	0.301799
林婷	77	1.31	1.17	117	80	5.01		28	58	1.63	21.83	85	0.905882	1.06	268.3	4.1	2.33455	0.93	0.56	12.69	2.82564	0.32695
石开玉	72	1.06	1.15	119	70	4.81		30	47	1.52	20.3428	85	0.847059	0.59	313.6	4.92	3.28818	1.12	0.8	7.08	1.51355	0.358751
冯琳	98	1.04	1.13	131	89	4.08		32	85	1.64	31.6032	109	0.899083	0.57	188.6	5.29	3.68727	1.29	0.93	2.73	0.49504	0.434387
黄新英	84	0.96	1.31	117	67	4.56		29	60.2	1.6	23.5156	90	0.933333	0.75	229.2	5.85	4.10364	1.3	0.92	12.11	2.45429	0.333625
黄淋芳	63	1.27	1.69	114	56	4.44		28	47	1.63	17.6898	82	0.768293	0.51	244.2	4.41	2.14273	0.85	0.57	6.27	1.23728	0.370381
林明艳	72	1.32	1.52	121	83	4.72		27	48.5	1.53	20.7185	84	0.857143	0.54	296	5.43	3.31	1.16	0.84	5.34	1.12021	0.376399
陈细烟	63	1.48	1.99	120	71	4.92		23	41	1.54	17.2879	81	0.777778	0.68	99.1	5.84	3.17727	2.15	1.01	5.31	1.16112	0.374205
陈烨	74	0.77	1.79	111	61	4.42		26	48	1.55	19.9792	82	0.902439	1.4	540.6	4.67	2.53	2.2	0.92	6.76	1.32796	0.366214
陈惠	84	2.12	0.9	127	89	4.84		25	67.6	1.63	25.4432	93	0.903226	0.69	439.9	4.13	2.26636	1	0.81	11.54	2.48238	0.333075
陈晓君	73	0.79	1.43	110	64	4.72		32	45.6	1.53	19.4797	84	0.869048	1.5	372.2	4.57	2.78091	1	0.6	1.71	0.35872	0.46249
李花	90	1.72	0.9	96	75	5.22		31	80	1.61	30.863	110	0.818182	0.82	261.7	4.42	2.73818	1.23	0.97	20.77	4.81864	0.303916
吴文英	72	1.56	1.22	111	73	5		29	42	1.45	19.9762	81	0.888889	0.49	259.8	4.42	2.49091	0.9	0.69	6.14	1.36444	0.364643
方丽随	66	0.45	1.59	121	69	4.79		26	49	1.6	19.1406	81	0.814815	0.63	154.4	4.82	3.02545	0.9	0.64	4.74	1.00909	0.382938
刘霞	83	0.69	1.07	113	78	4.62		26	58	1.58	23.2335	87	0.954023	1.19	335.3	4.61	3.22636	0.8	0.66	3.89	0.798747	0.398428
林群	85	2.9	0.61	114	80	4.82		23	69	1.55	28.7201	96	0.885417	0.32	248.4	3.98	2.05182	1.18	0.93	14.36	3.07623	0.323052
林莉萍	70	0.87	1.01	106	66	4.41		24	47.2	1.6	18.4375	84	0.833333	1.24	357.7	4.18	2.77455	0.85	0.63	3.96	0.77616	0.400415
陈玲	86	2.1	0.86	132	89	5.23		23	60.9	1.55	25.3486	93	0.924731	0.75	426.8	5.1	3.28545	1.13	0.9	8.89	2.06643	0.342152
林贤妹	68	0.89	1.18	107	64	4.8		30	45	1.48	20.5442	77	0.883117	0.6	136.7	4.42	2.83545	0.86	0.62	5.62	1.19893	0.372266
刘晓丹	74	0.58	1.29	122	83	5.45		24	50.1	1.52	21.6846	84	0.880952	0.54	280.1	5.49	3.93636	0.97	0.71	4.28	1.03671	0.381226
许亚珊	80	0.8	0.98	121	74	4.5		25	54	1.59	21.3599	90	0.888889	1.19	416.5	5.23	3.88636	1.03	0.84	8.69	1.738	0.351185
尹艳	65	1.03	1.26	125	84	4.92		25	48.9	1.61	18.865	79	0.822785	1.18	408.9	4.42	2.69182	1.13	0.68	4.3	0.940267	0.387491
陈荔娟	74	1.53	1	105	75	4.83		23	48.5	1.46	22.7529	85	0.870588	1.21	367.4	3.4	1.70455	0.58	1.2	3.04	0.652587	0.412866
江慧芳	78	1.23	1.17	103	77	4.54		29	56.5	1.61	21.797	94	0.829787	0.89	235.3	5.75	4.02091	1.22	0.94	4.26	0.859573	0.393432
江敏燕	96	1.24	0.9	137	89	4.74		28	77	1.63	28.9811	108	0.888889	0.88	318.2	4.01	2.54636	1.02	0.66	14.56	3.06731	0.323184
陈碧珍	82	1.31	1.8	103	64	4.94		25	58	1.56	23.833	90	0.911111	0.92	409.2	6.23	3.83455	1.43	0.9	6.14	1.34807	0.365341
连碧仙	100	1.11	0.83	118	78	5.19		22	80	1.61	30.863	110	0.909091	0.68	142.7	3.53	2.19545	0.91	0.66	7.89	1.81996	0.348734
俞丽云	78	0.6	0.75	108	70	5.33		23	60	1.58	24.0346	90	0.866667	0.77	324	2.99	1.96727	0.67	0.5	1.84	0.435876	0.445074
张莹	85	2.46	0.86	128	93	5.2		27	70.8	1.57	28.7233	100	0.85	0.97	532.3	3.5	1.52182	1.09	0.76	8.79	2.03147	0.343022
施琼梅	85	1.53	1.02	137	100	5.4		35	69	1.57	27.993	97	0.876289	1.13	407.9	3.99	2.27455	1.02	0.77	10.86	2.6064	0.330743
郑瑾	72	0.5	1.52	114	68	5.1		31	52.5	1.66	19.0521	88	0.818182	1.05	270.4	4.27	2.52273	0.95	0.51	5.3	1.20133	0.372146
陈敏	65	0.58	1.84	103	58	4.1		22	46	1.63	17.3134	82	0.792683	1	433.7	5.71	3.60636	0.96	0.69	1.25	0.227778	0.508915
李秀英	65	0.41	1.8	117	72	5.3		25	44	1.6	17.1875	77	0.844156	0.15	186.1	4.63	2.64364	0.65	0.47	3.07	0.723156	0.405402
林萍	82	1.09	1.16	109	73	5.7		31	62	1.6	24.2188	94	0.87234	0.61	229.2	4.61	2.95455	1	0.75	21.95	5.56067	0.298278
刘雅双	89	2.12	1.12	129	71	6.15		28	58	1.55	24.1415	90	0.988889	0.69	292.5	5.89	3.80636	1.41	1.06	10.8	2.952	0.324932
张文敏	76	0.82	1.22	116	71	4.76		24	55	1.61	21.2183	87	0.873563	1.29	276.8	3.3	1.70727	0.65	0.45	5.67	1.19952	0.372237
王磊	79	1.59	1.16	109	65	4.77		30	58	1.65	21.3039	95	0.831579	0.81	201.1	6.27	4.38727	1.35	1.01	2.7	0.5724	0.422805
蒋婷	82	2.26	0.95	104	61	5.21		32	61	1.57	24.7475	93	0.88172	0.57	180.2	4.93	2.95273	1.26	1.32	9.25	2.14189	0.340338
蔡丹丹	77	1.64	1.03	129	78	4.84		21	55	1.57	22.3133	89	0.865169	0.42	234.5	4.55	2.77455	1.21	0.79	5.96	1.28206	0.368275
曾美兰	76	0.77	1.29	94	57	4.78		22	57	1.62	21.7193	86	0.883721	0.86	345.9	4.04	2.4	1	0.53	5.29	1.12383	0.376201
陈婷婷	64	0.51	1.48	117	84	4.55		25	46	1.64	17.1029	77	0.831169	0.89	349.1	4.29	2.57818	1.01	0.52	3.61	0.730022	0.404729
俞露	87	1.15	1.11	124	66	4.74		33	59	1.62	22.4813	97	0.896907	0.69	252	5.11	3.47727	0.97	0.8	4.74	0.99856	0.383608
张华	96	3.61	0.9	124	85	6.06		26	67	1.54	28.251	96	1	0.84	230.5	6.3	3.75909	1.55	1.32	12.6	3.3936	0.318663
林丽萍	70	1.78	1.23	120	84	3.71		22	52	1.59	20.5688	90	0.777778	0.85	256.7	5.23	3.19091	1.37	0.89	4.5	0.742	0.403574
吴艳玲	73	3.42	0.99	106	64	5.22		26	51	1.59	20.1733	89	0.820225	0.84	292	5.59	3.04545	1.54	1.11	10.41	2.41512	0.334404

## Sheet: PCOS-MS
name	WC	TG	HDL	SBP	DBP	FPG		age	weight	height	BMI	hip circumference	WHR	TT	DHEAS	TC	LDL	ApoA	ApoB	FINS	HOMA-IR	QUICK
黄桂芳	98.5	1.99	0.78	121	87	6.16		26	80	1.69	28.0102	101	0.975248	0.85	391.4	5.57	3.88545	1.3	0.99	24.02	6.57614	0.291934
林丽花	87	1.57	1.16	121	85	4.71		33	67	1.58	26.8386	94	0.925532	0.8	356.2	4.48	2.60636	1.19	0.78	12.57	2.63132	0.330291
沈云	104	2.44	0.93	100	60	4.71		31	75	1.55	31.2175	109	0.954128	0.83	266.4	4.98	2.94091	1.26	1.01	11.99	2.50991	0.332545
卢娟	80	2.76	0.98	120	80	5.15		27	54	1.53	23.0681	90	0.888889	0.86	145.6	5.55	3.31545	1.02	0.95	8.17	1.87002	0.347306
李玲玲	85	0.5	1.24	115	92	5.04		23	62	1.58	24.8358	94	0.904255	1.08	135.7	4.17	2.70273	1.07	0.81	7.27	1.62848	0.354706
卢湘玉	86	2.23	0.97	100	70	5.07		31	72.5	1.63	27.2874	96	0.895833	0.81	416.8	5.33	3.34636	1.2	1.08	12.29	2.76935	0.327887
郑桂香	80	1.84	1.14	110	70	4.47		27	58	1.59	22.9421	88	0.909091	0.9	319	4.34	2.36364	1.17	0.76	5.44	1.08075	0.378619
张勤	84	1.9	1.24	125	75	4.73		30	67.5	1.64	25.0967	99	0.848485	0.76	273.8	4.99	2.88636	1.56	0.93	6.31	1.3265	0.366278
张春梅	83	1.4	1.23	133	86	4.89		26	65	1.59	25.711	95	0.873684	0.87	262.2	4.03	2.16364	1.09	0.88	8.6	1.86907	0.347333
黄晓丹	80	1.47	1.27	131	83	4.47		24	60	1.61	23.1473	92	0.869565	1.5	472.4	5.57	3.63182	1.58	1.04	7.59	1.50788	0.358961
蔡小兰	85	1.72	1.44	131	80	4.16		28	65	1.7	22.4913	95	0.894737	1.15	295.2	5.05	2.82818	1.5	0.98	11.41	2.10958	0.341105
柯素云	80	2.22	1.12	114	73	4.33		27	58	1.56	23.833	95	0.842105	0.96	239.1	4.83	2.70091	1.11	0.85	7.96	1.53186	0.35808
王晓英	88	1.77	0.94	131	83	4.61		21	71	1.55	29.5525	98	0.897959	1.24	150.6	4.16	2.41545	0.97	0.75	12.03	2.46481	0.333418
陈依妹	82	1.82	1.17	108	77	4.75		35	64	1.63	24.0882	97	0.845361	0.58	242.3	4.38	2.38273	1.09	0.79	12.14	2.56289	0.331545
丘玉清	82	2.66	1.3	140	85	6.59		28	61	1.56	25.0657	94	0.87234	0.72	293.5	6.41	3.90091	1.11	0.94	21.56	6.31468	0.293444
卢丽峰	110	2.47	1.61	110	85	4.49		31	83	1.7	28.7197	120	0.916667	0.86	105.9	4.89	2.15727	1.78	0.89	12.7	2.53436	0.33208
卓小英	102	2.37	1.09	110	75	4.49		28	84	1.65	30.854	112	0.910714	1.52	306.6	4.21	2.04273	1.1	0.77	9.96	1.98757	0.344142
潘燕萍	85	1.72	1.22	101	67	3.95		28	67	1.6	26.1719	96	0.885417	0.84	146.8	4.82	2.81818	1.13	1.01	14.32	2.51396	0.332468
王滢滢	90	0.62	1.19	130	80	5.45		24	70	1.67	25.0995	94	0.957447	0.74	394.3	3.2	1.72818	1	0.69	15.75	3.815	0.313583
林雍	86	1.28	1.04	138	92	4.97		32	85.5	1.66	31.0277	107	0.803738	0.82	143.1	4.27	2.64818	1.57	0.75	14.05	3.10349	0.322653
陈淑娟	89	2.87	0.83	112	79	4.65		26	76	1.62	28.959	104	0.855769	1.04	160.41	5.39	3.25545	1.6	1.05	14.91	3.0814	0.322976
江碧辉	85	2.14	0.88	121	78	4.98		25	69	1.55	28.7201	96	0.885417	0.72	219.8	5.52	3.66727	1.6	0.97	10.75	2.37933	0.335131
吕淑艳	87	2.68	1.43	108	64	5.94		29	64	1.59	25.3155	97	0.896907	1.43	246.5	5.38	2.73182	1.2	0.61	16.67	4.40088	0.307598
陈英英	82	0.74	1.22	123	85	5.06		24	59	1.63	22.2063	90	0.911111	0.74	429.2	4.11	2.55364	1.08	0.64	10.42	2.34334	0.335876
杨帆	84	0.84	1.07	116	85	4.61		28	74	1.6	28.9062	102	0.823529	0.72	437.9	4.28	2.82818	1.16	0.7	17.71	3.62858	0.315737
吴舒均	80	1.96	1.22	119	80	4.27		21	65	1.62	24.7676	89	0.898876	1.01	743.5	4.76	2.64909	1.14	0.86	6.2	1.17662	0.3734
陈妹妹	90	2.28	0.67	108	67	4.19		30	69.5	1.6	27.1484	92	0.978261	1.05	160.4	4.22	2.51364	1.14	0.87	24.12	4.49168	0.306761
林小平	80	0.97	1.14	105	76	6.6		28	60	1.62	22.8624	87	0.91954	0.7	88.5	5.32	3.73909	1.15	1.15	16.49	4.83707	0.303763
温小兰	82	2.35	0.97	120	80	3.42		31	58	1.56	23.833	88	0.931818	1.03	215.5	4.11	2.07182	1.64	0.76	5.62	0.85424	0.39385
冯琳	98	1.04	1.13	131	89	4.08		32	85	1.64	31.6032	109	0.899083	0.57	188.6	5.29	3.68727	1.29	0.93	2.73	0.49504	0.434387
陈惠	84	2.12	0.9	127	89	4.84		25	67.6	1.63	25.4432	93	0.903226	0.69	439.9	4.13	2.26636	1	0.81	11.54	2.48238	0.333075
李花	90	1.72	0.9	96	75	5.22		31	80	1.61	30.863	110	0.818182	0.82	261.7	4.42	2.73818	1.23	0.97	20.77	4.81864	0.303916
林群	85	2.9	0.61	114	80	4.82		23	69	1.55	28.7201	96	0.885417	0.32	248.4	3.98	2.05182	1.18	0.93	14.36	3.07623	0.323052
陈玲	86	2.1	0.86	132	89	5.23		23	60.9	1.55	25.3486	93	0.924731	0.75	426.8	5.1	3.28545	1.13	0.9	8.89	2.06643	0.342152
江敏燕	96	1.24	0.9	137	89	4.74		28	77	1.63	28.9811	108	0.888889	0.88	318.2	4.01	2.54636	1.02	0.66	14.56	3.06731	0.323184
张莹	85	2.46	0.86	128	93	5.2		27	70.8	1.57	28.7233	100	0.85	0.97	532.3	3.5	1.52182	1.09	0.76	8.79	2.03147	0.343022
施琼梅	85	1.53	1.02	137	100	5.4		35	69	1.57	27.993	97	0.876289	1.13	407.9	3.99	2.27455	1.02	0.77	10.86	2.6064	0.330743
林萍	82	1.09	1.16	109	73	5.7		31	62	1.6	24.2188	94	0.87234	0.61	229.2	4.61	2.95455	1	0.75	21.95	5.56067	0.298278
刘雅双	89	2.12	1.12	129	71	6.15		28	58	1.55	24.1415	90	0.988889	0.69	292.5	5.89	3.80636	1.41	1.06	10.8	2.952	0.324932
蒋婷	82	2.26	0.95	104	61	5.21		32	61	1.57	24.7475	93	0.88172	0.57	180.2	4.93	2.95273	1.26	1.32	9.25	2.14189	0.340338
张华	96	3.61	0.9	124	85	6.06		26	67	1.54	28.251	96	1	0.84	230.5	6.3	3.75909	1.55	1.32	12.6	3.3936	0.318663

## Sheet: PCOS-NO-MS
name	WC	TG	HDL	SBP	DBP	FPG		age	weight	height	BMI	hip circumference	WHR	TT	DHEAS	TC	LDL	ApoA	ApoB	FINS	HOMA-IR	QUICK
黄均	76	1	0.95	100	70	4.69		33	50	1.54	21.0828	86.5	0.878613	1	127.6	4.39	2.98545	1.12	0.83	11.88	2.47632	0.333193
范晓婕	86	0.86	1.05	105	60	3.62		27	60	1.58	24.0346	98	0.877551	0.9	291.2	3.45	2.00909	1.01	0.63	8.7	1.39973	0.363174
陈宝英	106	0.65	1.14	110	68	4.81		27	76	1.6	29.6875	107	0.990654	0.66	145.6	4.94	3.50455	1.74	1.05	17.69	3.78173	0.313957
吴素珍	84	1.56	1.02	105	65	5.46		28	54	1.55	22.4766	92	0.913043	1.16	219.6	4.57	2.84091	1.58	0.99	27.97	6.78739	0.290769
温跃青	90	1.36	1.05	120	80	4.1		30	65	1.6	25.3906	98	0.918367	0.87	297.1	5.14	3.47182	1.45	1.1	12.26	2.23404	0.338232
张小燕	85	1.15	0.99	110	70	5.15		26	63	1.6	24.6094	97	0.876289	0.87	374.1	4.32	2.80727	1.34	0.79	12.71	2.90918	0.325603
吴如洪	80	1.02	0.87	100	60	4.69		27	50	1.58	20.0288	89	0.898876	1.62	180.4	3.87	2.53636	1.91	0.7	6.77	1.41117	0.362709
林淑君	82	0.87	1.21	110	70	4		26	63	1.62	24.0055	91	0.901099	1.55	343.7	3.32	1.71455	1.35	0.62	8.06	1.43289	0.361838
陈颖	75	1.07	0.99	108	63	4.29		21	55	1.68	19.487	88	0.852273	0.84	289.2	3.58	2.10364	1.2	0.64	5.71	1.08871	0.378162
陈章琴	78	0.59	1.68	100	60	4.04		26	53	1.56	21.7784	90	0.866667	2.61	427.7	3.62	1.67182	1.2	0.65	2.13	0.382453	0.456614
林慧冬	76	0.9	1.39	120	70	5.02		25	65	1.7	22.4913	85	0.894118	2.49	278.5	5.77	3.97091	1.82	0.96	3.22	0.718418	0.405872
林升	82	0.8	1.42	100	93	4.64		20	65	1.62	24.7676	97	0.845361	0.84	448.1	4.98	3.19636	2.21	0.86	5.06	1.04348	0.380816
丁宁	80	0.58	1.14	100	70	4.65		27	66	1.58	26.4381	96	0.833333	1.2	497.4	4.99	3.58636	1.44	1.01	16.95	3.503	0.317269
潘美英	76	0.68	1.79	118	82	5.03		24	56	1.65	20.5693	89	0.853933	1.31	210	5.26	3.16091	1.1	0.99	6.52	1.45758	0.360869
张玲玲	77	1.41	1.1	115	72	4.74		28	54	1.6	21.0938	87	0.885057	1.03	209.4	6.15	4.40909	1.3	0.97	5.52	1.16288	0.374113
吴芳	85	0.52	2.19	110	73	5.2		22	63	1.6	24.6094	97	0.876289	0.49	262.6	5.95	3.52364	1.82	0.91	4.14	0.9568	0.386358
李讷	82	1.03	1.87	110	70	4.85		25	63	1.62	24.0055	91	0.901099	1.55	160.2	5.11	2.77182	1.86	0.8	5.2	1.12089	0.376362
陈爱娇	69	1.24	0.92	110	70	4.46		27	46	1.52	19.91	78	0.884615	1.05	244	4.93	3.44636	1.31	0.86	7.93	1.5719	0.356649
吕莺	77	1.77	1.32	120	70	4.18		31	60	1.68	21.2585	94	0.819149	0.97	380.4	5.5	3.37545	1.66	0.97	4.91	0.912169	0.389479
兰榕军	81	1.51	1.62	118	80	4.62		27	59	1.6	23.0469	95	0.852632	1.18	241.1	5.96	3.65364	1.94	0.93	9.4	1.93013	0.345657
郑秀英	90	1.07	1.97	115	80	3.7		33	71.5	1.57	29.0073	95	0.947368	1.38	386.6	4.5	2.04364	1.58	0.68	10.32	1.69707	0.352466
张晓华	91	0.82	1.67	100	60	5.79		32	66	1.6	25.7812	100	0.91	1.2	250.8	6.13	4.08727	1.48	1.16	17.6	4.52907	0.306423
王舒婷	90	0.84	1.18	120	75	5.03		20	66	1.55	27.4714	100	0.9	0.68	220.9	5.17	3.60818	1.01	0.78	12.77	2.8548	0.326474
曾巧玲	73	1.36	1.72	100	65	4.38		25	55	1.6	21.4844	85	0.858824	0.76	192.2	5.03	2.69182	1.7	0.84	5.75	1.11933	0.376447
赵晓芳	75	0.57	1.79	115	65	4.49		32	54	1.6	21.0938	87	0.862069	1.12	189.1	3.65	1.60091	1.56	0.58	4.31	0.860084	0.393392
施成	73	0.3	1.57	115	65	5.1		20	63	1.66	22.8625	101	0.722772	1.01	233.1	3.75	2.04364	1.41	0.6	5.15	1.16733	0.373881
林立	83	1.16	0.9	104	63	3.97		26	57	1.48	26.0226	89	0.932584	0.81	173	5.94	4.51273	1.51	1.01	11.84	2.0891	0.341598
陈丽玉	70	0.34	1.77	122	75	4.42		22	48.5	1.59	19.1844	86	0.813953	1.29	266	4.64	2.71545	1.56	0.78	2.3	0.451822	0.442004
陈艺莹	81	2.09	1.39	110	70	4.64		28	53	1.5	23.5556	88	0.920455	0.78	228.3	6.62	4.28	1.69	1.18	18.11	3.73468	0.314494
陈美香	65	1.45	1.45	96	63	4.69		26	45	1.6	17.5781	84	0.77381	1.04	203.3	5.32	3.21091	1.54	0.78	5.92	1.23399	0.37054
薛烨	75	1.29	1.5	116	76	5.53		27	56	1.63	21.0772	87	0.862069	0.8	301	3.89	1.80364	1.23	0.71	7.09	1.74256	0.351044
林珠金	73	0.43	1.55	124	79	4.82		27	50	1.48	22.8269	89	0.820225	1.08	152	5.07	3.32455	1.54	0.95	3.91	0.837609	0.395179
陈炎清	72	0.54	2.08	136	72	4.86		24	52	1.65	19.1001	85	0.847059	0.47	159.4	4	1.67455	1.47	0.63	6.55	1.4148	0.362562
林淋	64	0.44	1.17	119	70	4.69		21	48	1.58	19.2277	84	0.761905	0.78	167.4	4.39	3.02	1.18	0.74	9.78	2.03859	0.342843
郑静薇	97	1.38	1.54	119	82	5.15		22	66	1.7	22.8374	107	0.906542	0.9	315	3.24	1.07273	1.27	0.72	13.25	3.03278	0.323698
魏建萍	81	1.36	1.01	118	71	5.23		28	63	1.58	25.2363	95	0.852632	0.89	308.1	3.38	1.75182	1.04	0.69	8.72	2.02692	0.343137
孙惠娟	95	2	1.34	115	70	5.29		25	92	1.7	31.8339	109	0.87156	0.81	240.5	5.62	3.37091	1.24	1	23.59	5.54627	0.298378
孙丽英	65	1.22	1.8	126	60	4.94		22	45	1.56	18.4911	83	0.783133	1.13	420	4.64	2.28545	1.6	0.96	4.59	1.00776	0.383023
沈珊	78	0.64	2.33	125	60	4.85		34	57	1.56	23.4221	95	0.821053	0.75	336.1	5.11	2.48909	1.88	0.88	8.34	1.79773	0.349384
王华琴	73	1.92	1.45	120	82	4.81		26	60	1.67	21.5139	91	0.802198	0.85	242	4.94	2.61727	1.26	0.89	8.3	1.77436	0.350079
林雨露	69	0.75	2	113	68	5.22		23	49	1.55	20.3954	85	0.811765	0.2	191	5.04	2.69909	2	0.78	3.24	0.75168	0.402659
何风云	90	1.05	2.8	127	80	4.06		22	78	1.65	28.6501	107	0.841121	1.31	222.7	6.14	2.86273	2.24	0.97	6.47	1.16748	0.373873
许建华	75	0.53	1.8	110	70	4.78		30	60	1.65	22.0386	87	0.862069	0.98	347.7	4.06	2.01909	1.41	0.6	3.11	0.660702	0.411953
陈凤舟	76	1.22	1.17	115	75	4.15		30	57	1.62	21.7193	85	0.894118	1.25	344.9	4.95	3.22545	1.03	0.9	4.57	0.842911	0.394752
江霞	80	0.6	1.21	106	73	4.35		26	64	1.68	22.6757	92	0.869565	0.4	173.2	5.4	3.91727	1.17	1.01	6.78	1.3108	0.366974
陈四兰	77	0.7	1.8	102	62	4.69		30	57	1.63	21.4536	91	0.846154	2.01	200.1	6.16	4.04182	1.6	0.63	11.74	2.44714	0.333766
唐文婷	66	0.8	1.62	110	70	4.42		23	47	1.6	18.3594	81	0.814815	1	389.6	3.44	1.45636	1.01	0.54	4.27	0.838818	0.395082
林娜	73	0.96	1.54	119	73	4.5		25	45	1.52	19.4771	82	0.890244	1.12	385.1	5.17	3.19364	1.23	0.82	8.98	1.796	0.349435
曾于弼	73	0.6	1.15	114	71	4.97		30	47	1.58	18.8271	87	0.83908	0.6	241	5.64	4.21727	1.04	0.68	4.87	1.07573	0.378909
胡丽珠	66	0.7	1.64	94	60	5.12		27	41.5	1.58	16.6239	83	0.795181	1.2	361.9	5.17	3.21182	1.18	0.64	6.34	1.4427	0.36145
施恩	79	0.88	1.38	111	74	5.13		31	52	1.57	21.0962	89	0.88764	0.41	353.4	5.61	3.83	1.18	0.77	5.98	1.36344	0.364685
卢琳	73	0.69	1.01	110	75	4.37		22	52	1.57	21.0962	87	0.83908	0.78	265.3	4.31	2.98636	1.01	0.72	4.11	0.798253	0.398471
陈微	72	0.72	1.33	95	65	4.12		25	46.5	1.54	19.607	86	0.837209	0.87	411.8	4.78	3.12273	1.23	0.71	2.13	0.390027	0.454845
林霞	78	1.38	1.13	114	69	5.03		30	55	1.54	23.1911	85	0.917647	0.94	146.7	5	3.24273	1.03	0.78	4.38	0.979173	0.384865
陈梦莹	64	0.69	1.57	98	60	3.88		21	50	1.6	19.5312	84	0.761905	0.79	190.4	3.89	2.00636	1.21	0.55	1.53	0.26384	0.492903
刘依妹	66	0.57	1.3	102	59	4.36		38	50	1.53	21.3593	83	0.795181	0.82	195.4	4.09	2.53091	1.14	0.62	6.95	1.34676	0.365398
郑婷婷	68	0.62	1.27	110	80	4.46		26	55	1.65	20.202	96	0.708333	1.6	82.1	4.18	2.62818	1.11	0.61	4.29	0.850373	0.394156
林吓丽	69	0.4	1.32	129	88	3.13		21	42.5	1.54	17.9204	81	0.851852	1.11	323.7	4.28	2.77818	1.09	0.58	9.36	1.30208	0.367364
魏婷婷	63	0.56	1.41	105	71	4.47		23	46.5	1.61	17.9391	84	0.75	1.22	349.8	4.47	2.80545	1.15	0.61	3.14	0.623813	0.416231
吴小轩	67	0.5	1.23	108	68	4.37		21	44	1.52	19.0443	81	0.82716	0.48	155.2	4.08	2.62273	1.07	0.61	2.65	0.514689	0.43122
黄嫩梅	69	2.79	0.95	115	65	5.4		27	51	1.6	19.9219	82	0.841463	0.59	202.3	3.76	1.54182	1.02	0.75	5.13	1.2312	0.370675
陈新颖	80	0.48	1.45	121	72	4.61		20	63	1.64	23.4236	95	0.842105	1.08	182.8	4	2.33182	1.07	0.62	2.07	0.42412	0.447439
阮茜	78	1.67	1.5	112	80	4.64		29	53.5	1.57	21.7047	92	0.847826	1.18	382.5	6.29	4.03091	1.01	0.96	10.77	2.22101	0.338523
姜妍妍	77	0.57	1.16	120	80	4.3		27	59	1.72	19.9432	91	0.846154	1.37	336.4	3.91	2.49091	1.05	0.59	3.05	0.582889	0.4214
林喜雪	69	1.74	1.35	103	67	4.61		33	49	1.56	20.1348	80	0.8625	0.41	485.5	5.66	3.51909	1.01	0.88	2.98	0.610569	0.417852
丁雅华	74	1.24	1.58	104	71	4.45		27	54	1.62	20.5761	92	0.804348	1.23	235.9	5.32	3.17636	1	0.77	2.46	0.486533	0.435812
李丹楠	82	1.19	1.51	116	79	4.32		29	56	1.61	21.6041	91	0.901099	0.88	357.9	6.31	4.25909	1	0.9	5.95	1.1424	0.375196
曾肖岩	69	1.01	1.67	114	72	3.29		30	49	1.66	17.782	83	0.831325	0.91	457.9	4.5	2.37091	1.09	0.69	5.98	0.874409	0.392285
元美玲	81	1.11	1.77	113	77	4.44		23	64	1.63	24.0882	94	0.861702	0.88	487.9	4.71	2.43545	1.13	0.63	13.46	2.65611	0.329848
李林妹	67	0.86	1.7	120	80	3.84		24	47	1.55	19.563	81	0.82716	0.95	352	5.23	3.13909	1.1	0.7	0.68	0.116053	0.598046
陈晶晶	71	0.82	1.78	118	70	3.59		20	54	1.64	20.0773	93	0.763441	1.36	729.7	4.36	2.20727	1.17	0.57	8.75	1.39611	0.363323
刘娟娟	75	0.54	1.49	114	65	4.84		28	59	1.65	21.6713	91	0.824176	0.31	326	3.67	1.93455	1.04	0.52	10.1	2.17262	0.339623
陈小青	75	1.24	1.53	116	67	5.03		28	56	1.55	23.3091	88	0.852273	1.19	426	5.47	3.37636	0.91	0.76	17.15	3.83398	0.313371
陈爱清	63	1.09	1.29	85	50	3.68		30	44	1.6	17.1875	79	0.797468	0.91	137.1	3.42	1.63455	0.97	0.54	3.16	0.516836	0.430885
林丹娜	75	1.47	1.04	123	78	4.85		20	59	1.62	22.4813	95	0.789474	1.13	515	5.15	3.44182	1	0.79	16.28	3.50924	0.317192
郑国玉	75	1.03	1.96	122	71	4.79		38	58	1.55	24.1415	88	0.852273	1.01	239.8	6.66	4.23182	1.45	1.2	3.05	0.649311	0.413239
肖玉贞	86	1.58	1.33	114	73	4.76		34	57	1.48	26.0226	95	0.905263	0.99	430.5	5.33	3.28182	1.09	1.16	6.88	1.4555	0.36095
许美容	78	0.67	1.38	114	60	5.62		26	60.5	1.6	23.6328	90	0.866667	0.66	342.7	3.96	2.27545	1.24	0.82	4.97	1.2414	0.370183
郑洲	78	0.52	1.62	117	64	4.05		29	52	1.58	20.83	90	0.866667	0.99	275.8	3.91	2.05364	1.18	0.73	8.57	1.5426	0.357691
郑梅琴	75	1.73	1.34	119	78	4.14		28	50.5	1.57	20.4876	84	0.892857	0.44	433.2	5.72	3.59364	1.01	1.03	12.41	2.28344	0.337149
胡佳茜	78	1.08	1.66	103	66	3.99		23	60.5	1.62	23.0529	90	0.866667	1.75	432.5	5.49	3.33909	1.24	0.97	4.54	0.805093	0.397883
何娟娟	75	0.74	1.22	98	61	5.08		27	55	1.57	22.3133	88	0.852273	0.76	452.4	3.32	1.76364	1.1	0.75	4.14	0.93472	0.387877
尤金菊	77	0.7	1.93	127	88	3.91		25	54	1.6	21.0938	90	0.855556	1.36	315.5	4.49	2.24182	1.17	0.79	6.93	1.20428	0.371999
杨秀焰	110	1.02	1.2	118	71	2.56		27	71	1.59	28.0843	115	0.956522	1.1	341.1	5.34	3.67636	0.87	1.06	8.69	0.988729	0.384241
蔡首燕	111	1.01	1.13	114	68	4.44		24	79	1.67	28.3266	124	0.895161	0.5	252.5	4.5	2.91091	0.83	0.94	10.42	2.05621	0.342404
林冰娜	67	1.61	1.36	100	68	4.23		30	50	1.53	21.3593	81	0.82716	0.84	336.7	4.76	2.66818	0.84	1.03	8.27	1.55476	0.357255
林雪芬	77	1.31	1.59	130	82	4.13		26	58.5	1.55	24.3496	89	0.865169	1.03	296.9	5.51	3.32455	1.36	1.02	9.24	1.69605	0.352498
徐华	80	1.2	1.58	119	80	4.03		30	57	1.56	23.4221	90	0.888889	1.09	354.8	4.96	2.83455	1.34	0.85	10.95	1.96127	0.344829
吴敏	75	1.58	1.28	107	63	4.59		22	55	1.62	20.9572	85	0.882353	1.06	567.4	4.82	2.82182	0.83	0.84	13.49	2.75196	0.328181
周倩	59	0.72	1.56	116	71	4.61		22	46	1.52	19.91	81	0.728395	0.79	287.7	3.52	1.63273	1.01	0.54	3.96	0.81136	0.397351
王云钦	64	0.53	1.43	120	84	4.9		24	39	1.53	16.6603	79	0.810127	0.75	304.5	4.06	2.38909	0.9	0.69	3.32	0.723022	0.405415
赵苏	74	1.03	1.53	101	69	3.81		27	61.5	1.61	23.7259	89	0.831461	1.26	416.7	6.43	4.43182	1.47	0.91	2.21	0.374227	0.458592
陈秋榕	79	1.28	1.29	110	63	4.68		27	58.5	1.53	24.9904	92	0.858696	1.33	536.4	4.2	2.32818	1.03	0.88	6.1	1.2688	0.368888
程华莺	77	1.45	0.96	121	74	6.95		26	73	1.67	26.1752	97	0.793814	0.89	215.7	4.5	2.88091	0.83	0.94	16.7	3.29547	0.319962
林琼珊	61	0.67	1.2	95	62	4.68		25	49	1.56	20.1348	83	0.73494	0.81	373.1	4.61	3.10545	1.56	0.76	5.29	1.10032	0.377505
张莹	66	1.03	1.24	109	78	4.51		27	50.5	1.62	19.2425	88	0.75	1.13	375.7	3.84	2.13182	1.34	0.6	5.22	1.04632	0.380645
陈柳珠	68	0.89	1.1	121	87	4.12		27	45.5	1.5	20.2222	78	0.871795	1.04	224.6	3.43	1.92545	1.26	0.55	2.09	0.382702	0.456555
郑晓烨	68	0.8	1.29	106	69	3.32		20	57	1.7	19.7232	84	0.809524	0.66	295.8	4.01	2.35636	1.31	0.61	3.85	0.568089	0.423393
赖玉琴	99	1.56	0.91	109	71	4.87		34	70	1.6	27.3438	108	0.916667	0.65	138.2	4.14	2.52091	1.6	0.75	4.09	0.885258	0.391462
吴美选	70	1.92	1.43	123	76	4.62		27	51	1.58	20.4294	86	0.813953	1.15	279.7	5.41	3.10727	1.75	0.89	5.08	1.04309	0.380839
柳小青	64	1.38	1.24	108	71	4.33		23	50	1.55	20.8117	77	0.831169	0.75	373.9	4.08	2.21273	1.31	0.68	4.92	0.946827	0.387038
林美艳	61	0.48	1.39	124	74	3.88		27	43	1.53	18.369	79	0.772152	1.05	235.9	4.85	3.24182	1.34	0.71	3.47	0.598382	0.419387
汪文玲	88	1.5	0.99	123	63	5.15		22	78	1.65	28.6501	105	0.838095	0.78	361.1	4.07	2.39818	1.41	0.64	12.81	2.93207	0.325243
周波弟	62	0.76	1.53	123	72	4.01		27	43	1.56	17.6693	76	0.815789	1.09	158.4	4.02	2.14455	1.27	0.62	1.06	0.188916	0.530864
郭宝贞	80	0.96	1.16	119	77	5.46		35	60.5	1.55	25.1821	91	0.879121	1.02	535.4	4	2.40364	1.41	0.65	5.67	1.37592	0.36416
胡雅娟	67	0.62	1.23	117	71	4.38		28	58	1.58	23.2335	89	0.752809	0.91	260.7	3.64	2.12818	1.13	0.61	3.34	0.650187	0.413139
李晓英	73	2.89	1.74	125	80	3.8		28	59.5	1.53	25.4176	89	0.820225	0.92	262.1	5.23	2.17636	1	1.18	7.54	1.27342	0.368673
蔡敏璇	84	0.89	0.97	105	71	3.74		22	74.4	1.62	28.3493	99	0.848485	0.78	157.1	3.84	2.46545	1.39	0.61	19.66	3.26793	0.320335
刘秀敏	66	1.3	1.36	116	68	4.97		27	43.6	1.51	19.122	83	0.795181	0.78	229.3	4.62	2.66909	1.47	0.72	17.2	3.79929	0.313759
李文梅	76	1.29	1.54	102	72	4.57		29	49	1.57	19.8791	87	0.873563	0.8	384.8	4.49	2.36364	1.05	0.77	2.4	0.487467	0.435654
黄晓萍	76	0.53	1.92	120	70	4.38		33	47.5	1.6	18.5547	90	0.844444	1.08	318.2	4.17	2.00909	1	0.6	1.12	0.218027	0.513884
魏丽娇	88	0.81	1.46	113	79	4.77		33	74	1.69	25.9095	103	0.854369	0.9	277.8	5	3.17182	1.09	0.79	3.71	0.78652	0.399494
林燕	71	0.78	1.28	106	76	4.51		27	47.5	1.54	20.0287	86	0.825581	0.84	202.2	5.01	3.37545	1.11	0.85	0.42	0.0841867	0.652444
林晨舒	106	1.03	1.21	121	76	4.64		24	85	1.72	28.7317	120	0.883333	0.92	384.4	6.69	5.01182	1.35	1.06	6.9	1.42293	0.362235
何青青	71	0.75	1.38	122	72	4.57		20	55	1.67	19.721	86	0.825581	1.1	346.4	5.17	3.44909	1.13	0.82	6.52	1.32428	0.366376
谢铃影	67	0.38	1.41	114	76	5.36		28	50	1.52	21.6413	86	0.77907	1.47	432.2	4.57	2.98727	1.06	0.72	8.33	1.98439	0.344224
付顺莲	62	0.68	1.09	91	57	4.54		20	43	1.55	17.898	82	0.756098	0.31	134.5	3.2	1.80091	0.9	0.48	2.66	0.536729	0.427861
林花田	61	0.5	1.5	116	67	4.25		22	49	1.66	17.782	83	0.73494	1.35	472.7	5.56	3.83273	0.88	0.75	3.74	0.706444	0.407078
王倩	56	0.55	1.46	116	75	4.4		25	56	1.6	21.875	68	0.823529	0.92	386	4.15	2.44	0.94	0.7	10.24	2.00249	0.343758
黄海燕	73	1.32	1.06	110	57	4.37		26	49	1.5	21.7778	85	0.858824	0.4	266.1	5.51	3.85	1.31	1	6.42	1.24691	0.36992
兰兰香	93	0.72	1.45	114	66	5.04		24	72	1.62	27.4348	95	0.978947	0.87	167.9	4.86	3.08273	1.04	0.74	12.89	2.88736	0.32595
卓美娇	90	0.98	1.52	119	77	3.84		20	71	1.63	26.7229	95	0.947368	1.55	363.3	4.7	2.73455	1.1	0.77	4.65	0.7936	0.398874
张沁心	82	0.71	1.13	112	77	4.34		20	65	1.63	24.4646	89	0.921348	1.39	552.5	4.33	2.87727	0.95	0.72	10.65	2.05427	0.342453
赖婷婷	90	1.46	1.62	110	78	4.5		30	70	1.58	28.0404	93	0.967742	0.75	155.6	4.63	2.34636	0.99	0.7	5.63	1.126	0.376082
翁秀华	67	0.62	1.97	120	86	4.9		24	47	1.55	19.563	78	0.858974	0.72	336.9	5.83	3.57818	1.12	0.78	3.66	0.797067	0.398573
郑玲	74	1.13	2.35	117	76	6.14		29	48	1.55	19.9792	82	0.902439	0.45	195.3	6.14	3.27636	1.31	1.03	4.94	1.34807	0.365341
乔宇	87	1.17	1.13	107	56	4.79		30	60	1.6	23.4375	90	0.966667	0.83	160	5.63	3.96818	1.2	0.92	23.87	5.08166	0.301799
林婷	77	1.31	1.17	117	80	5.01		28	58	1.63	21.83	85	0.905882	1.06	268.3	4.1	2.33455	0.93	0.56	12.69	2.82564	0.32695
石开玉	72	1.06	1.15	119	70	4.81		30	47	1.52	20.3428	85	0.847059	0.59	313.6	4.92	3.28818	1.12	0.8	7.08	1.51355	0.358751
黄新英	84	0.96	1.31	117	67	4.56		29	60.2	1.6	23.5156	90	0.933333	0.75	229.2	5.85	4.10364	1.3	0.92	12.11	2.45429	0.333625
黄淋芳	63	1.27	1.69	114	56	4.44		28	47	1.63	17.6898	82	0.768293	0.51	244.2	4.41	2.14273	0.85	0.57	6.27	1.93673	0.34548
林明艳	72	1.32	1.52	121	83	4.72		27	48.5	1.53	20.7185	84	0.857143	0.54	296	5.43	3.31	1.16	0.84	5.34	1.12021	0.376399
陈细烟	63	1.48	1.99	120	71	4.92		23	41	1.54	17.2879	81	0.777778	0.68	99.1	5.84	3.17727	2.15	1.01	5.31	1.16112	0.374205
陈烨	74	0.77	1.79	111	61	4.42		26	48	1.55	19.9792	82	0.902439	1.4	540.6	4.67	2.53	2.2	0.92	6.76	1.32796	0.366214
陈晓君	73	0.79	1.43	110	64	4.72		32	45.6	1.53	19.4797	84	0.869048	1.5	372.2	4.57	2.78091	1	0.6	1.71	0.35872	0.46249
吴文英	72	1.56	1.22	111	73	5		29	42	1.45	19.9762	81	0.888889	0.49	259.8	4.42	2.49091	0.9	0.69	6.14	1.36444	0.364643
方丽随	66	0.45	1.59	121	69	4.79		26	49	1.6	19.1406	81	0.814815	0.63	154.4	4.82	3.02545	0.9	0.64	4.74	1.00909	0.382938
刘霞	83	0.69	1.07	113	78	4.62		26	58	1.58	23.2335	87	0.954023	1.19	335.3	4.61	3.22636	0.8	0.66	3.89	0.798747	0.398428
林莉萍	70	0.87	1.01	106	66	4.41		24	47.2	1.6	18.4375	84	0.833333	1.24	357.7	4.18	2.77455	0.85	0.63	3.96	0.77616	0.400415
林贤妹	68	0.89	1.18	107	64	4.8		30	45	1.48	20.5442	77	0.883117	0.6	136.7	4.42	2.83545	0.86	0.62	5.62	1.19893	0.372266
刘晓丹	74	0.58	1.29	122	83	5.45		24	50.1	1.52	21.6846	84	0.880952	0.54	280.1	5.49	3.93636	0.97	0.71	4.28	1.03671	0.381226
许亚珊	80	0.8	0.98	121	74	4.5		25	54	1.59	21.3599	90	0.888889	1.19	416.5	5.23	3.88636	1.03	0.84	8.69	1.738	0.351185
尹艳	65	1.03	1.26	125	84	4.92		25	48.9	1.61	18.865	79	0.822785	1.18	408.9	4.42	2.69182	1.13	0.68	4.3	0.940267	0.387491
陈荔娟	74	1.53	1	105	75	4.83		23	48.5	1.46	22.7529	85	0.870588	1.21	367.4	3.4	1.70455	0.58	1.2	3.04	0.652587	0.412866
江慧芳	78	1.23	1.17	103	77	4.54		29	56.5	1.61	21.797	94	0.829787	0.89	235.3	5.75	4.02091	1.22	0.94	4.26	0.859573	0.393432
陈碧珍	82	1.31	1.8	103	64	4.94		25	58	1.56	23.833	90	0.911111	0.92	409.2	6.23	3.83455	1.43	0.9	6.14	1.34807	0.365341
连碧仙	100	1.11	0.83	118	78	5.19		22	80	1.61	30.863	110	0.909091	0.68	142.7	3.53	2.19545	0.91	0.66	7.89	1.81996	0.348734
俞丽云	78	0.6	0.75	108	70	5.33		23	60	1.58	24.0346	90	0.866667	0.77	324	2.99	1.96727	0.67	0.5	1.84	0.435876	0.445074
郑瑾	72	0.5	1.52	114	68	5.1		31	52.5	1.66	19.0521	88	0.818182	1.05	270.4	4.27	2.52273	0.95	0.51	5.3	1.20133	0.372146
陈敏	65	0.58	1.84	103	58	4.1		22	46	1.63	17.3134	82	0.792683	1	433.7	5.71	3.60636	0.96	0.69	1.25	0.227778	0.508915
李秀英	65	0.41	1.8	117	72	5.3		25	44	1.6	17.1875	77	0.844156	0.15	186.1	4.63	2.64364	0.65	0.47	3.07	0.723156	0.405402
张文敏	76	0.82	1.22	116	71	4.76		24	55	1.61	21.2183	87	0.873563	1.29	276.8	3.3	1.70727	0.65	0.45	5.67	1.19952	0.372237
王磊	79	1.59	1.16	109	65	4.77		30	58	1.65	21.3039	95	0.831579	0.81	201.1	6.27	4.38727	1.35	1.01	2.7	0.5724	0.422805
蔡丹丹	77	1.64	1.03	129	78	4.84		21	55	1.57	22.3133	89	0.865169	0.42	234.5	4.55	2.77455	1.21	0.79	5.96	1.28206	0.368275
曾美兰	76	0.77	1.29	94	57	4.78		22	57	1.62	21.7193	86	0.883721	0.86	345.9	4.04	2.4	1	0.53	5.29	1.12383	0.376201
陈婷婷	64	0.51	1.48	117	84	4.55		25	46	1.64	17.1029	77	0.831169	0.89	349.1	4.29	2.57818	1.01	0.52	3.61	0.730022	0.404729
俞露	87	1.15	1.11	124	66	4.74		33	59	1.62	22.4813	97	0.896907	0.69	252	5.11	3.47727	0.97	0.8	4.74	0.99856	0.383608
林丽萍	70	1.78	1.23	120	84	3.71		22	52	1.59	20.5688	90	0.777778	0.85	256.7	5.23	3.19091	1.37	0.89	4.5	0.742	0.403574
吴艳玲	73	3.42	0.99	106	64	5.22		26	51	1.59	20.1733	89	0.820225	0.84	292	5.59	3.04545	1.54	1.11	10.41	2.41512	0.334404

## Sheet: HTGW
name	WC	TG	HDL	SBP	DBP	FPG		age	weight	height	BMI	hip circumference	WHR	TT	DHEAS	TC	LDL	ApoA	ApoB	FINS	HOMA-IR	QUICK
黄桂芳	98.5	1.99	0.78	121	87	6.16		26	80	1.69	28.0102	101	0.975248	0.85	391.4	5.57	3.88545	1.3	0.99	24.02	6.57614	0.291934
沈云	104	2.44	0.93	100	60	4.71		31	75	1.55	31.2175	109	0.954128	0.83	266.4	4.98	2.94091	1.26	1.01	11.99	2.50991	0.332545
卢娟	80	2.76	0.98	120	80	5.15		27	54	1.53	23.0681	90	0.888889	0.86	145.6	5.55	3.31545	1.02	0.95	8.17	1.87002	0.347306
卢湘玉	86	2.23	0.97	100	70	5.07		31	72.5	1.63	27.2874	96	0.895833	0.81	416.8	5.33	3.34636	1.2	1.08	12.29	2.76935	0.327887
郑桂香	80	1.84	1.14	110	70	4.47		27	58	1.59	22.9421	88	0.909091	0.9	319	4.34	2.36364	1.17	0.76	5.44	1.08075	0.378619
张勤	84	1.9	1.24	125	75	4.73		30	67.5	1.64	25.0967	99	0.848485	0.76	273.8	4.99	2.88636	1.56	0.93	6.31	1.3265	0.366278
陈艺莹	81	2.09	1.39	110	70	4.64		28	53	1.5	23.5556	88	0.920455	0.78	228.3	6.62	4.28	1.69	1.18	18.11	3.73468	0.314494
孙惠娟	95	2	1.34	115	70	5.29		25	92	1.7	31.8339	109	0.87156	0.81	240.5	5.62	3.37091	1.24	1	23.59	5.54627	0.298378
蔡小兰	85	1.72	1.44	131	80	4.16		28	65	1.7	22.4913	95	0.894737	1.15	295.2	5.05	2.82818	1.5	0.98	11.41	2.10958	0.341105
柯素云	80	2.22	1.12	114	73	4.33		27	58	1.56	23.833	95	0.842105	0.96	239.1	4.83	2.70091	1.11	0.85	7.96	1.53186	0.35808
王晓英	88	1.77	0.94	131	83	4.61		21	71	1.55	29.5525	98	0.897959	1.24	150.6	4.16	2.41545	0.97	0.75	12.03	2.46481	0.333418
陈依妹	82	1.82	1.17	108	77	4.75		35	64	1.63	24.0882	97	0.845361	0.58	242.3	4.38	2.38273	1.09	0.79	12.14	2.56289	0.331545
丘玉清	82	2.66	1.3	140	85	6.59		28	61	1.56	25.0657	94	0.87234	0.72	293.5	6.41	3.90091	1.11	0.94	21.56	6.31468	0.293444
卢丽峰	110	2.47	1.61	110	85	4.49		31	83	1.7	28.7197	120	0.916667	0.86	105.9	4.89	2.15727	1.78	0.89	12.7	2.53436	0.33208
卓小英	102	2.37	1.09	110	75	4.49		28	84	1.65	30.854	112	0.910714	1.52	306.6	4.21	2.04273	1.1	0.77	9.96	1.98757	0.344142
潘燕萍	85	1.72	1.22	101	67	3.95		28	67	1.6	26.1719	96	0.885417	0.84	146.8	4.82	2.81818	1.13	1.01	14.32	2.51396	0.332468
陈淑娟	89	2.87	0.83	112	79	4.65		26	76	1.62	28.959	104	0.855769	1.04	160.41	5.39	3.25545	1.6	1.05	14.91	3.0814	0.322976
江碧辉	85	2.14	0.88	121	78	4.98		25	69	1.55	28.7201	96	0.885417	0.72	219.8	5.52	3.66727	1.6	0.97	10.75	2.37933	0.335131
吕淑艳	87	2.68	1.43	108	64	5.94		29	64	1.59	25.3155	97	0.896907	1.43	246.5	5.38	2.73182	1.2	0.61	16.67	4.40088	0.307598
吴舒均	80	1.96	1.22	119	80	4.27		21	65	1.62	24.7676	89	0.898876	1.01	743.5	4.76	2.64909	1.14	0.86	6.2	1.17662	0.3734
陈妹妹	90	2.28	0.67	108	67	4.19		30	69.5	1.6	27.1484	92	0.978261	1.05	160.4	4.22	2.51364	1.14	0.87	24.12	4.49168	0.306761
温小兰	82	2.35	0.97	120	80	3.42		31	58	1.56	23.833	88	0.931818	1.03	215.5	4.11	2.07182	1.64	0.76	5.62	0.85424	0.39385
陈惠	84	2.12	0.9	127	89	4.84		25	67.6	1.63	25.4432	93	0.903226	0.69	439.9	4.13	2.26636	1	0.81	11.54	2.48238	0.333075
李花	90	1.72	0.9	96	75	5.22		31	80	1.61	30.863	110	0.818182	0.82	261.7	4.42	2.73818	1.23	0.97	20.77	4.81864	0.303916
林群	85	2.9	0.61	114	80	4.82		23	69	1.55	28.7201	96	0.885417	0.32	248.4	3.98	2.05182	1.18	0.93	14.36	3.07623	0.323052
陈玲	86	2.1	0.86	132	89	5.23		23	60.9	1.55	25.3486	93	0.924731	0.75	426.8	5.1	3.28545	1.13	0.9	8.89	2.06643	0.342152
张莹	85	2.46	0.86	128	93	5.2		27	70.8	1.57	28.7233	100	0.85	0.97	532.3	3.5	1.52182	1.09	0.76	8.79	2.03147	0.343022
刘雅双	89	2.12	1.12	129	71	6.15		28	58	1.55	24.1415	90	0.988889	0.69	292.5	5.89	3.80636	1.41	1.06	10.8	2.952	0.324932
蒋婷	82	2.26	0.95	104	61	5.21		32	61	1.57	24.7475	93	0.88172	0.57	180.2	4.93	2.95273	1.26	1.32	9.25	2.14189	0.340338
张华	96	3.61	0.9	124	85	6.06		26	67	1.54	28.251	96	1	0.84	230.5	6.3	3.75909	1.55	1.32	12.6	3.3936	0.318663

## Sheet: NO-HTGW
name	WC	TG	HDL	SBP	DBP	FPG		age	weight	height	BMI	hip circumference	WHR	TT	DHEAS	TC	LDL	ApoA	ApoB	FINS	HOMA-IR	QUICK
黄均	76	1	0.95	100	70	4.69		33	50	1.54	21.0828	86.5	0.878613	1	127.6	4.39	2.98545	1.12	0.83	11.88	2.47632	0.333193
林丽花	87	1.57	1.16	121	85	4.71		33	67	1.58	26.8386	94	0.925532	0.8	356.2	4.48	2.60636	1.19	0.78	12.57	2.63132	0.330291
范晓婕	86	0.86	1.05	105	60	3.62		27	60	1.58	24.0346	98	0.877551	0.9	291.2	3.45	2.00909	1.01	0.63	8.7	1.39973	0.363174
陈宝英	106	0.65	1.14	110	68	4.81		27	76	1.6	29.6875	107	0.990654	0.66	145.6	4.94	3.50455	1.74	1.05	17.69	3.78173	0.313957
吴素珍	84	1.56	1.02	105	65	5.46		28	54	1.55	22.4766	92	0.913043	1.16	219.6	4.57	2.84091	1.58	0.99	27.97	6.78739	0.290769
温跃青	90	1.36	1.05	120	80	4.1		30	65	1.6	25.3906	98	0.918367	0.87	297.1	5.14	3.47182	1.45	1.1	12.26	2.23404	0.338232
张小燕	85	1.15	0.99	110	70	5.15		26	63	1.6	24.6094	97	0.876289	0.87	374.1	4.32	2.80727	1.34	0.79	12.71	2.90918	0.325603
吴如洪	80	1.02	0.87	100	60	4.69		27	50	1.58	20.0288	89	0.898876	1.62	180.4	3.87	2.53636	1.91	0.7	6.77	1.41117	0.362709
林淑君	82	0.87	1.21	110	70	4		26	63	1.62	24.0055	91	0.901099	1.55	343.7	3.32	1.71455	1.35	0.62	8.06	1.43289	0.361838
陈颖	75	1.07	0.99	108	63	4.29		21	55	1.68	19.487	88	0.852273	0.84	289.2	3.58	2.10364	1.2	0.64	5.71	1.08871	0.378162
陈章琴	78	0.59	1.68	100	60	4.04		26	53	1.56	21.7784	90	0.866667	2.61	427.7	3.62	1.67182	1.2	0.65	2.13	0.382453	0.456614
林慧冬	76	0.9	1.39	120	70	5.02		25	65	1.7	22.4913	85	0.894118	2.49	278.5	5.77	3.97091	1.82	0.96	3.22	0.718418	0.405872
林升	82	0.8	1.42	100	93	4.64		20	65	1.62	24.7676	97	0.845361	0.84	448.1	4.98	3.19636	2.21	0.86	5.06	1.04348	0.380816
丁宁	80	0.58	1.14	100	70	4.65		27	66	1.58	26.4381	96	0.833333	1.2	497.4	4.99	3.58636	1.44	1.01	16.95	3.503	0.317269
潘美英	76	0.68	1.79	118	82	5.03		24	56	1.65	20.5693	89	0.853933	1.31	210	5.26	3.16091	1.1	0.99	6.52	1.45758	0.360869
张玲玲	77	1.41	1.1	115	72	4.74		28	54	1.6	21.0938	87	0.885057	1.03	209.4	6.15	4.40909	1.3	0.97	5.52	1.16288	0.374113
吴芳	85	0.52	2.19	110	73	5.2		22	63	1.6	24.6094	97	0.876289	0.49	262.6	5.95	3.52364	1.82	0.91	4.14	0.9568	0.386358
李讷	82	1.03	1.87	110	70	4.85		25	63	1.62	24.0055	91	0.901099	1.55	160.2	5.11	2.77182	1.86	0.8	5.2	1.12089	0.376362
陈爱娇	69	1.24	0.92	110	70	4.46		27	46	1.52	19.91	78	0.884615	1.05	244	4.93	3.44636	1.31	0.86	7.93	1.5719	0.356649
吕莺	77	1.77	1.32	120	70	4.18		31	60	1.68	21.2585	94	0.819149	0.97	380.4	5.5	3.37545	1.66	0.97	4.91	0.912169	0.389479
李玲玲	85	0.5	1.24	115	92	5.04		23	62	1.58	24.8358	94	0.904255	1.08	135.7	4.17	2.70273	1.07	0.81	7.27	1.62848	0.354706
兰榕军	81	1.51	1.62	118	80	4.62		27	59	1.6	23.0469	95	0.852632	1.18	241.1	5.96	3.65364	1.94	0.93	9.4	1.93013	0.345657
郑秀英	90	1.07	1.97	115	80	3.7		33	71.5	1.57	29.0073	95	0.947368	1.38	386.6	4.5	2.04364	1.58	0.68	10.32	1.69707	0.352466
张晓华	91	0.82	1.67	100	60	5.79		32	66	1.6	25.7812	100	0.91	1.2	250.8	6.13	4.08727	1.48	1.16	17.6	4.52907	0.306423
王舒婷	90	0.84	1.18	120	75	5.03		20	66	1.55	27.4714	100	0.9	0.68	220.9	5.17	3.60818	1.01	0.78	12.77	2.8548	0.326474
曾巧玲	73	1.36	1.72	100	65	4.38		25	55	1.6	21.4844	85	0.858824	0.76	192.2	5.03	2.69182	1.7	0.84	5.75	1.11933	0.376447
赵晓芳	75	0.57	1.79	115	65	4.49		32	54	1.6	21.0938	87	0.862069	1.12	189.1	3.65	1.60091	1.56	0.58	4.31	0.860084	0.393392
施成	73	0.3	1.57	115	65	5.1		20	63	1.66	22.8625	101	0.722772	1.01	233.1	3.75	2.04364	1.41	0.6	5.15	1.16733	0.373881
林立	83	1.16	0.9	104	63	3.97		26	57	1.48	26.0226	89	0.932584	0.81	173	5.94	4.51273	1.51	1.01	11.84	2.0891	0.341598
陈丽玉	70	0.34	1.77	122	75	4.42		22	48.5	1.59	19.1844	86	0.813953	1.29	266	4.64	2.71545	1.56	0.78	2.3	0.451822	0.442004
张春梅	83	1.4	1.23	133	86	4.89		26	65	1.59	25.711	95	0.873684	0.87	262.2	4.03	2.16364	1.09	0.88	8.6	1.86907	0.347333
陈美香	65	1.45	1.45	96	63	4.69		26	45	1.6	17.5781	84	0.77381	1.04	203.3	5.32	3.21091	1.54	0.78	5.92	1.23399	0.37054
薛烨	75	1.29	1.5	116	76	5.53		27	56	1.63	21.0772	87	0.862069	0.8	301	3.89	1.80364	1.23	0.71	7.09	1.74256	0.351044
林珠金	73	0.43	1.55	124	79	4.82		27	50	1.48	22.8269	89	0.820225	1.08	152	5.07	3.32455	1.54	0.95	3.91	0.837609	0.395179
黄晓丹	80	1.47	1.27	131	83	4.47		24	60	1.61	23.1473	92	0.869565	1.5	472.4	5.57	3.63182	1.58	1.04	7.59	1.50788	0.358961
陈炎清	72	0.54	2.08	136	72	4.86		24	52	1.65	19.1001	85	0.847059	0.47	159.4	4	1.67455	1.47	0.63	6.55	1.4148	0.362562
林淋	64	0.44	1.17	119	70	4.69		21	48	1.58	19.2277	84	0.761905	0.78	167.4	4.39	3.02	1.18	0.74	9.78	2.03859	0.342843
郑静薇	97	1.38	1.54	119	82	5.15		22	66	1.7	22.8374	107	0.906542	0.9	315	3.24	1.07273	1.27	0.72	13.25	3.03278	0.323698
魏建萍	81	1.36	1.01	118	71	5.23		28	63	1.58	25.2363	95	0.852632	0.89	308.1	3.38	1.75182	1.04	0.69	8.72	2.02692	0.343137
孙丽英	65	1.22	1.8	126	60	4.94		22	45	1.56	18.4911	83	0.783133	1.13	420	4.64	2.28545	1.6	0.96	4.59	1.00776	0.383023
沈珊	78	0.64	2.33	125	60	4.85		34	57	1.56	23.4221	95	0.821053	0.75	336.1	5.11	2.48909	1.88	0.88	8.34	1.79773	0.349384
王华琴	73	1.92	1.45	120	82	4.81		26	60	1.67	21.5139	91	0.802198	0.85	242	4.94	2.61727	1.26	0.89	8.3	1.77436	0.350079
林雨露	69	0.75	2	113	68	5.22		23	49	1.55	20.3954	85	0.811765	0.2	191	5.04	2.69909	2	0.78	3.24	0.75168	0.402659
何风云	90	1.05	2.8	127	80	4.06		22	78	1.65	28.6501	107	0.841121	1.31	222.7	6.14	2.86273	2.24	0.97	6.47	1.16748	0.373873
许建华	75	0.53	1.8	110	70	4.78		30	60	1.65	22.0386	87	0.862069	0.98	347.7	4.06	2.01909	1.41	0.6	3.11	0.660702	0.411953
陈凤舟	76	1.22	1.17	115	75	4.15		30	57	1.62	21.7193	85	0.894118	1.25	344.9	4.95	3.22545	1.03	0.9	4.57	0.842911	0.394752
江霞	80	0.6	1.21	106	73	4.35		26	64	1.68	22.6757	92	0.869565	0.4	173.2	5.4	3.91727	1.17	1.01	6.78	1.3108	0.366974
陈四兰	77	0.7	1.8	102	62	4.69		30	57	1.63	21.4536	91	0.846154	2.01	200.1	6.16	4.04182	1.6	0.63	11.74	2.44714	0.333766
唐文婷	66	0.8	1.62	110	70	4.42		23	47	1.6	18.3594	81	0.814815	1	389.6	3.44	1.45636	1.01	0.54	4.27	0.838818	0.395082
林娜	73	0.96	1.54	119	73	4.5		25	45	1.52	19.4771	82	0.890244	1.12	385.1	5.17	3.19364	1.23	0.82	8.98	1.796	0.349435
曾于弼	73	0.6	1.15	114	71	4.97		30	47	1.58	18.8271	87	0.83908	0.6	241	5.64	4.21727	1.04	0.68	4.87	1.07573	0.378909
胡丽珠	66	0.7	1.64	94	60	5.12		27	41.5	1.58	16.6239	83	0.795181	1.2	361.9	5.17	3.21182	1.18	0.64	6.34	1.4427	0.36145
施恩	79	0.88	1.38	111	74	5.13		31	52	1.57	21.0962	89	0.88764	0.41	353.4	5.61	3.83	1.18	0.77	5.98	1.36344	0.364685
卢琳	73	0.69	1.01	110	75	4.37		22	52	1.57	21.0962	87	0.83908	0.78	265.3	4.31	2.98636	1.01	0.72	4.11	0.798253	0.398471
陈微	72	0.72	1.33	95	65	4.12		25	46.5	1.54	19.607	86	0.837209	0.87	411.8	4.78	3.12273	1.23	0.71	2.13	0.390027	0.454845
林霞	78	1.38	1.13	114	69	5.03		30	55	1.54	23.1911	85	0.917647	0.94	146.7	5	3.24273	1.03	0.78	4.38	0.979173	0.384865
陈梦莹	64	0.69	1.57	98	60	3.88		21	50	1.6	19.5312	84	0.761905	0.79	190.4	3.89	2.00636	1.21	0.55	1.53	0.26384	0.492903
刘依妹	66	0.57	1.3	102	59	4.36		38	50	1.53	21.3593	83	0.795181	0.82	195.4	4.09	2.53091	1.14	0.62	6.95	1.34676	0.365398
郑婷婷	68	0.62	1.27	110	80	4.46		26	55	1.65	20.202	96	0.708333	1.6	82.1	4.18	2.62818	1.11	0.61	4.29	0.850373	0.394156
林吓丽	69	0.4	1.32	129	88	3.13		21	42.5	1.54	17.9204	81	0.851852	1.11	323.7	4.28	2.77818	1.09	0.58	9.36	1.30208	0.367364
魏婷婷	63	0.56	1.41	105	71	4.47		23	46.5	1.61	17.9391	84	0.75	1.22	349.8	4.47	2.80545	1.15	0.61	3.14	0.623813	0.416231
吴小轩	67	0.5	1.23	108	68	4.37		21	44	1.52	19.0443	81	0.82716	0.48	155.2	4.08	2.62273	1.07	0.61	2.65	0.514689	0.43122
黄嫩梅	69	2.79	0.95	115	65	5.4		27	51	1.6	19.9219	82	0.841463	0.59	202.3	3.76	1.54182	1.02	0.75	5.13	1.2312	0.370675
陈新颖	80	0.48	1.45	121	72	4.61		20	63	1.64	23.4236	95	0.842105	1.08	182.8	4	2.33182	1.07	0.62	2.07	0.42412	0.447439
阮茜	78	1.67	1.5	112	80	4.64		29	53.5	1.57	21.7047	92	0.847826	1.18	382.5	6.29	4.03091	1.01	0.96	10.77	2.22101	0.338523
姜妍妍	77	0.57	1.16	120	80	4.3		27	59	1.72	19.9432	91	0.846154	1.37	336.4	3.91	2.49091	1.05	0.59	3.05	0.582889	0.4214
林喜雪	69	1.74	1.35	103	67	4.61		33	49	1.56	20.1348	80	0.8625	0.41	485.5	5.66	3.51909	1.01	0.88	2.98	0.610569	0.417852
丁雅华	74	1.24	1.58	104	71	4.45		27	54	1.62	20.5761	92	0.804348	1.23	235.9	5.32	3.17636	1	0.77	2.46	0.486533	0.435812
李丹楠	82	1.19	1.51	116	79	4.32		29	56	1.61	21.6041	91	0.901099	0.88	357.9	6.31	4.25909	1	0.9	5.95	1.1424	0.375196
曾肖岩	69	1.01	1.67	114	72	3.29		30	49	1.66	17.782	83	0.831325	0.91	457.9	4.5	2.37091	1.09	0.69	5.98	0.874409	0.392285
元美玲	81	1.11	1.77	113	77	4.44		23	64	1.63	24.0882	94	0.861702	0.88	487.9	4.71	2.43545	1.13	0.63	13.46	2.65611	0.329848
李林妹	67	0.86	1.7	120	80	3.84		24	47	1.55	19.563	81	0.82716	0.95	352	5.23	3.13909	1.1	0.7	0.68	0.116053	0.598046
陈晶晶	71	0.82	1.78	118	70	3.59		20	54	1.64	20.0773	93	0.763441	1.36	729.7	4.36	2.20727	1.17	0.57	8.75	1.39611	0.363323
刘娟娟	75	0.54	1.49	114	65	4.84		28	59	1.65	21.6713	91	0.824176	0.31	326	3.67	1.93455	1.04	0.52	10.1	2.17262	0.339623
陈小青	75	1.24	1.53	116	67	5.03		28	56	1.55	23.3091	88	0.852273	1.19	426	5.47	3.37636	0.91	0.76	17.15	3.83398	0.313371
陈爱清	63	1.09	1.29	85	50	3.68		30	44	1.6	17.1875	79	0.797468	0.91	137.1	3.42	1.63455	0.97	0.54	3.16	0.516836	0.430885
林丹娜	75	1.47	1.04	123	78	4.85		20	59	1.62	22.4813	95	0.789474	1.13	515	5.15	3.44182	1	0.79	16.28	3.50924	0.317192
郑国玉	75	1.03	1.96	122	71	4.79		38	58	1.55	24.1415	88	0.852273	1.01	239.8	6.66	4.23182	1.45	1.2	3.05	0.649311	0.413239
肖玉贞	86	1.58	1.33	114	73	4.76		34	57	1.48	26.0226	95	0.905263	0.99	430.5	5.33	3.28182	1.09	1.16	6.88	1.4555	0.36095
许美容	78	0.67	1.38	114	60	5.62		26	60.5	1.6	23.6328	90	0.866667	0.66	342.7	3.96	2.27545	1.24	0.82	4.97	1.2414	0.370183
郑洲	78	0.52	1.62	117	64	4.05		29	52	1.58	20.83	90	0.866667	0.99	275.8	3.91	2.05364	1.18	0.73	8.57	1.5426	0.357691
郑梅琴	75	1.73	1.34	119	78	4.14		28	50.5	1.57	20.4876	84	0.892857	0.44	433.2	5.72	3.59364	1.01	1.03	12.41	2.28344	0.337149
王滢滢	90	0.62	1.19	130	80	5.45		24	70	1.67	25.0995	94	0.957447	0.74	394.3	3.2	1.72818	1	0.69	15.75	3.815	0.313583
胡佳茜	78	1.08	1.66	103	66	3.99		23	60.5	1.62	23.0529	90	0.866667	1.75	432.5	5.49	3.33909	1.24	0.97	4.54	0.805093	0.397883
何娟娟	75	0.74	1.22	98	61	5.08		27	55	1.57	22.3133	88	0.852273	0.76	452.4	3.32	1.76364	1.1	0.75	4.14	0.93472	0.387877
尤金菊	77	0.7	1.93	127	88	3.91		25	54	1.6	21.0938	90	0.855556	1.36	315.5	4.49	2.24182	1.17	0.79	6.93	1.20428	0.371999
杨秀焰	110	1.02	1.2	118	71	2.56		27	71	1.59	28.0843	115	0.956522	1.1	341.1	5.34	3.67636	0.87	1.06	8.69	0.988729	0.384241
蔡首燕	111	1.01	1.13	114	68	4.44		24	79	1.67	28.3266	124	0.895161	0.5	252.5	4.5	2.91091	0.83	0.94	10.42	2.05621	0.342404
林冰娜	67	1.61	1.36	100	68	4.23		30	50	1.53	21.3593	81	0.82716	0.84	336.7	4.76	2.66818	0.84	1.03	8.27	1.55476	0.357255
林雪芬	77	1.31	1.59	130	82	4.13		26	58.5	1.55	24.3496	89	0.865169	1.03	296.9	5.51	3.32455	1.36	1.02	9.24	1.69605	0.352498
徐华	80	1.2	1.58	119	80	4.03		30	57	1.56	23.4221	90	0.888889	1.09	354.8	4.96	2.83455	1.34	0.85	10.95	1.96127	0.344829
吴敏	75	1.58	1.28	107	63	4.59		22	55	1.62	20.9572	85	0.882353	1.06	567.4	4.82	2.82182	0.83	0.84	13.49	2.75196	0.328181
周倩	59	0.72	1.56	116	71	4.61		22	46	1.52	19.91	81	0.728395	0.79	287.7	3.52	1.63273	1.01	0.54	3.96	0.81136	0.397351
王云钦	64	0.53	1.43	120	84	4.9		24	39	1.53	16.6603	79	0.810127	0.75	304.5	4.06	2.38909	0.9	0.69	3.32	0.723022	0.405415
赵苏	74	1.03	1.53	101	69	3.81		27	61.5	1.61	23.7259	89	0.831461	1.26	416.7	6.43	4.43182	1.47	0.91	2.21	0.374227	0.458592
陈秋榕	79	1.28	1.29	110	63	4.68		27	58.5	1.53	24.9904	92	0.858696	1.33	536.4	4.2	2.32818	1.03	0.88	6.1	1.2688	0.368888
林雍	86	1.28	1.04	138	92	4.97		32	85.5	1.66	31.0277	107	0.803738	0.82	143.1	4.27	2.64818	1.57	0.75	14.05	3.10349	0.322653
程华莺	77	1.45	0.96	121	74	6.95		26	73	1.67	26.1752	97	0.793814	0.89	215.7	4.5	2.88091	0.83	0.94	16.7	3.29547	0.319962
林琼珊	61	0.67	1.2	95	62	4.68		25	49	1.56	20.1348	83	0.73494	0.81	373.1	4.61	3.10545	1.56	0.76	5.29	1.10032	0.377505
张莹	66	1.03	1.24	109	78	4.51		27	50.5	1.62	19.2425	88	0.75	1.13	375.7	3.84	2.13182	1.34	0.6	5.22	1.04632	0.380645
陈柳珠	68	0.89	1.1	121	87	4.12		27	45.5	1.5	20.2222	78	0.871795	1.04	224.6	3.43	1.92545	1.26	0.55	2.09	0.382702	0.456555
郑晓烨	68	0.8	1.29	106	69	3.32		20	57	1.7	19.7232	84	0.809524	0.66	295.8	4.01	2.35636	1.31	0.61	3.85	0.568089	0.423393
赖玉琴	99	1.56	0.91	109	71	4.87		34	70	1.6	27.3438	108	0.916667	0.65	138.2	4.14	2.52091	1.6	0.75	4.09	0.885258	0.391462
吴美选	70	1.92	1.43	123	76	4.62		27	51	1.58	20.4294	86	0.813953	1.15	279.7	5.41	3.10727	1.75	0.89	5.08	1.04309	0.380839
柳小青	64	1.38	1.24	108	71	4.33		23	50	1.55	20.8117	77	0.831169	0.75	373.9	4.08	2.21273	1.31	0.68	4.92	0.946827	0.387038
林美艳	61	0.48	1.39	124	74	3.88		27	43	1.53	18.369	79	0.772152	1.05	235.9	4.85	3.24182	1.34	0.71	3.47	0.598382	0.419387
汪文玲	88	1.5	0.99	123	63	5.15		22	78	1.65	28.6501	105	0.838095	0.78	361.1	4.07	2.39818	1.41	0.64	12.81	2.93207	0.325243
周波弟	62	0.76	1.53	123	72	4.01		27	43	1.56	17.6693	76	0.815789	1.09	158.4	4.02	2.14455	1.27	0.62	1.06	0.188916	0.530864
郭宝贞	80	0.96	1.16	119	77	5.46		35	60.5	1.55	25.1821	91	0.879121	1.02	535.4	4	2.40364	1.41	0.65	5.67	1.37592	0.36416
胡雅娟	67	0.62	1.23	117	71	4.38		28	58	1.58	23.2335	89	0.752809	0.91	260.7	3.64	2.12818	1.13	0.61	3.34	0.650187	0.413139
李晓英	73	2.89	1.74	125	80	3.8		28	59.5	1.53	25.4176	89	0.820225	0.92	262.1	5.23	2.17636	1	1.18	7.54	1.27342	0.368673
蔡敏璇	84	0.89	0.97	105	71	3.74		22	74.4	1.62	28.3493	99	0.848485	0.78	157.1	3.84	2.46545	1.39	0.61	19.66	3.26793	0.320335
刘秀敏	66	1.3	1.36	116	68	4.97		27	43.6	1.51	19.122	83	0.795181	0.78	229.3	4.62	2.66909	1.47	0.72	17.2	3.79929	0.313759
李文梅	76	1.29	1.54	102	72	4.57		29	49	1.57	19.8791	87	0.873563	0.8	384.8	4.49	2.36364	1.05	0.77	2.4	0.487467	0.435654
黄晓萍	76	0.53	1.92	120	70	4.38		33	47.5	1.6	18.5547	90	0.844444	1.08	318.2	4.17	2.00909	1	0.6	1.12	0.218027	0.513884
魏丽娇	88	0.81	1.46	113	79	4.77		33	74	1.69	25.9095	103	0.854369	0.9	277.8	5	3.17182	1.09	0.79	3.71	0.78652	0.399494
林燕	71	0.78	1.28	106	76	4.51		27	47.5	1.54	20.0287	86	0.825581	0.84	202.2	5.01	3.37545	1.11	0.85	0.42	0.0841867	0.652444
林晨舒	106	1.03	1.21	121	76	4.64		24	85	1.72	28.7317	120	0.883333	0.92	384.4	6.69	5.01182	1.35	1.06	6.9	1.42293	0.362235
何青青	71	0.75	1.38	122	72	4.57		20	55	1.67	19.721	86	0.825581	1.1	346.4	5.17	3.44909	1.13	0.82	6.52	1.32428	0.366376
谢铃影	67	0.38	1.41	114	76	5.36		28	50	1.52	21.6413	86	0.77907	1.47	432.2	4.57	2.98727	1.06	0.72	8.33	1.98439	0.344224
付顺莲	62	0.68	1.09	91	57	4.54		20	43	1.55	17.898	82	0.756098	0.31	134.5	3.2	1.80091	0.9	0.48	2.66	0.536729	0.427861
林花田	61	0.5	1.5	116	67	4.25		22	49	1.66	17.782	83	0.73494	1.35	472.7	5.56	3.83273	0.88	0.75	3.74	0.706444	0.407078
陈英英	82	0.74	1.22	123	85	5.06		24	59	1.63	22.2063	90	0.911111	0.74	429.2	4.11	2.55364	1.08	0.64	10.42	2.34334	0.335876
王倩	56	0.55	1.46	116	75	4.4		25	56	1.6	21.875	68	0.823529	0.92	386	4.15	2.44	0.94	0.7	10.24	2.00249	0.343758
黄海燕	73	1.32	1.06	110	57	4.37		26	49	1.5	21.7778	85	0.858824	0.4	266.1	5.51	3.85	1.31	1	6.42	1.24691	0.36992
兰兰香	93	0.72	1.45	114	66	5.04		24	72	1.62	27.4348	95	0.978947	0.87	167.9	4.86	3.08273	1.04	0.74	12.89	2.88736	0.32595
杨帆	84	0.84	1.07	116	85	4.61		28	74	1.6	28.9062	102	0.823529	0.72	437.9	4.28	2.82818	1.16	0.7	17.71	3.62858	0.315737
卓美娇	90	0.98	1.52	119	77	3.84		20	71	1.63	26.7229	95	0.947368	1.55	363.3	4.7	2.73455	1.1	0.77	4.65	0.7936	0.398874
张沁心	82	0.71	1.13	112	77	4.34		20	65	1.63	24.4646	89	0.921348	1.39	552.5	4.33	2.87727	0.95	0.72	10.65	2.05427	0.342453
赖婷婷	90	1.46	1.62	110	78	4.5		30	70	1.58	28.0404	93	0.967742	0.75	155.6	4.63	2.34636	0.99	0.7	5.63	1.126	0.376082
林小平	80	0.97	1.14	105	76	6.6		28	60	1.62	22.8624	87	0.91954	0.7	88.5	5.32	3.73909	1.15	1.15	16.49	4.83707	0.303763
翁秀华	67	0.62	1.97	120	86	4.9		24	47	1.55	19.563	78	0.858974	0.72	336.9	5.83	3.57818	1.12	0.78	3.66	0.797067	0.398573
郑玲	74	1.13	2.35	117	76	6.14		29	48	1.55	19.9792	82	0.902439	0.45	195.3	6.14	3.27636	1.31	1.03	4.94	1.34807	0.365341
乔宇	87	1.17	1.13	107	56	4.79		30	60	1.6	23.4375	90	0.966667	0.83	160	5.63	3.96818	1.2	0.92	23.87	5.08166	0.301799
林婷	77	1.31	1.17	117	80	5.01		28	58	1.63	21.83	85	0.905882	1.06	268.3	4.1	2.33455	0.93	0.56	12.69	2.82564	0.32695
石开玉	72	1.06	1.15	119	70	4.81		30	47	1.52	20.3428	85	0.847059	0.59	313.6	4.92	3.28818	1.12	0.8	7.08	1.51355	0.358751
冯琳	98	1.04	1.13	131	89	4.08		32	85	1.64	31.6032	109	0.899083	0.57	188.6	5.29	3.68727	1.29	0.93	2.73	0.49504	0.434387
黄新英	84	0.96	1.31	117	67	4.56		29	60.2	1.6	23.5156	90	0.933333	0.75	229.2	5.85	4.10364	1.3	0.92	12.11	2.45429	0.333625
黄淋芳	63	1.27	1.69	114	56	4.44		28	47	1.63	17.6898	82	0.768293	0.51	244.2	4.41	2.14273	0.85	0.57	6.27	1.93673	0.34548
林明艳	72	1.32	1.52	121	83	4.72		27	48.5	1.53	20.7185	84	0.857143	0.54	296	5.43	3.31	1.16	0.84	5.34	1.12021	0.376399
陈细烟	63	1.48	1.99	120	71	4.92		23	41	1.54	17.2879	81	0.777778	0.68	99.1	5.84	3.17727	2.15	1.01	5.31	1.16112	0.374205
陈烨	74	0.77	1.79	111	61	4.42		26	48	1.55	19.9792	82	0.902439	1.4	540.6	4.67	2.53	2.2	0.92	6.76	1.32796	0.366214
陈晓君	73	0.79	1.43	110	64	4.72		32	45.6	1.53	19.4797	84	0.869048	1.5	372.2	4.57	2.78091	1	0.6	1.71	0.35872	0.46249
吴文英	72	1.56	1.22	111	73	5		29	42	1.45	19.9762	81	0.888889	0.49	259.8	4.42	2.49091	0.9	0.69	6.14	1.36444	0.364643
方丽随	66	0.45	1.59	121	69	4.79		26	49	1.6	19.1406	81	0.814815	0.63	154.4	4.82	3.02545	0.9	0.64	4.74	1.00909	0.382938
刘霞	83	0.69	1.07	113	78	4.62		26	58	1.58	23.2335	87	0.954023	1.19	335.3	4.61	3.22636	0.8	0.66	3.89	0.798747	0.398428
林莉萍	70	0.87	1.01	106	66	4.41		24	47.2	1.6	18.4375	84	0.833333	1.24	357.7	4.18	2.77455	0.85	0.63	3.96	0.77616	0.400415
林贤妹	68	0.89	1.18	107	64	4.8		30	45	1.48	20.5442	77	0.883117	0.6	136.7	4.42	2.83545	0.86	0.62	5.62	1.19893	0.372266
刘晓丹	74	0.58	1.29	122	83	5.45		24	50.1	1.52	21.6846	84	0.880952	0.54	280.1	5.49	3.93636	0.97	0.71	4.28	1.03671	0.381226
许亚珊	80	0.8	0.98	121	74	4.5		25	54	1.59	21.3599	90	0.888889	1.19	416.5	5.23	3.88636	1.03	0.84	8.69	1.738	0.351185
尹艳	65	1.03	1.26	125	84	4.92		25	48.9	1.61	18.865	79	0.822785	1.18	408.9	4.42	2.69182	1.13	0.68	4.3	0.940267	0.387491
陈荔娟	74	1.53	1	105	75	4.83		23	48.5	1.46	22.7529	85	0.870588	1.21	367.4	3.4	1.70455	0.58	1.2	3.04	0.652587	0.412866
江慧芳	78	1.23	1.17	103	77	4.54		29	56.5	1.61	21.797	94	0.829787	0.89	235.3	5.75	4.02091	1.22	0.94	4.26	0.859573	0.393432
江敏燕	96	1.24	0.9	137	89	4.74		28	77	1.63	28.9811	108	0.888889	0.88	318.2	4.01	2.54636	1.02	0.66	14.56	3.06731	0.323184
陈碧珍	82	1.31	1.8	103	64	4.94		25	58	1.56	23.833	90	0.911111	0.92	409.2	6.23	3.83455	1.43	0.9	6.14	1.34807	0.365341
连碧仙	100	1.11	0.83	118	78	5.19		22	80	1.61	30.863	110	0.909091	0.68	142.7	3.53	2.19545	0.91	0.66	7.89	1.81996	0.348734
俞丽云	78	0.6	0.75	108	70	5.33		23	60	1.58	24.0346	90	0.866667	0.77	324	2.99	1.96727	0.67	0.5	1.84	0.435876	0.445074
施琼梅	85	1.53	1.02	137	100	5.4		35	69	1.57	27.993	97	0.876289	1.13	407.9	3.99	2.27455	1.02	0.77	10.86	2.6064	0.330743
郑瑾	72	0.5	1.52	114	68	5.1		31	52.5	1.66	19.0521	88	0.818182	1.05	270.4	4.27	2.52273	0.95	0.51	5.3	1.20133	0.372146
陈敏	65	0.58	1.84	103	58	4.1		22	46	1.63	17.3134	82	0.792683	1	433.7	5.71	3.60636	0.96	0.69	1.25	0.227778	0.508915
李秀英	65	0.41	1.8	117	72	5.3		25	44	1.6	17.1875	77	0.844156	0.15	186.1	4.63	2.64364	0.65	0.47	3.07	0.723156	0.405402
林萍	82	1.09	1.16	109	73	5.7		31	62	1.6	24.2188	94	0.87234	0.61	229.2	4.61	2.95455	1	0.75	21.95	5.56067	0.298278
张文敏	76	0.82	1.22	116	71	4.76		24	55	1.61	21.2183	87	0.873563	1.29	276.8	3.3	1.70727	0.65	0.45	5.67	1.19952	0.372237
王磊	79	1.59	1.16	109	65	4.77		30	58	1.65	21.3039	95	0.831579	0.81	201.1	6.27	4.38727	1.35	1.01	2.7	0.5724	0.422805
蔡丹丹	77	1.64	1.03	129	78	4.84		21	55	1.57	22.3133	89	0.865169	0.42	234.5	4.55	2.77455	1.21	0.79	5.96	1.28206	0.368275
曾美兰	76	0.77	1.29	94	57	4.78		22	57	1.62	21.7193	86	0.883721	0.86	345.9	4.04	2.4	1	0.53	5.29	1.12383	0.376201
陈婷婷	64	0.51	1.48	117	84	4.55		25	46	1.64	17.1029	77	0.831169	0.89	349.1	4.29	2.57818	1.01	0.52	3.61	0.730022	0.404729
俞露	87	1.15	1.11	124	66	4.74		33	59	1.62	22.4813	97	0.896907	0.69	252	5.11	3.47727	0.97	0.8	4.74	0.99856	0.383608
林丽萍	70	1.78	1.23	120	84	3.71		22	52	1.59	20.5688	90	0.777778	0.85	256.7	5.23	3.19091	1.37	0.89	4.5	0.742	0.403574
吴艳玲	73	3.42	0.99	106	64	5.22		26	51	1.59	20.1733	89	0.820225	0.84	292	5.59	3.04545	1.54	1.11	10.41	2.41512	0.334404

## Sheet: PCOS+MS+HTGW
name	WC	TG	HDL	SBP	DBP	FPG		age	weight	height	BMI	hip circumference	WHR	TT	DHEAS	TC	LDL	ApoA	ApoB	FINS	HOMA-IR	QUICK
黄桂芳	98.5	1.99	0.78	121	87	6.16		26	80	1.69	28.0102	101	0.975248	0.85	391.4	5.57	3.88545	1.3	0.99	24.02	6.57614	0.291934
沈云	104	2.44	0.93	100	60	4.71		31	75	1.55	31.2175	109	0.954128	0.83	266.4	4.98	2.94091	1.26	1.01	11.99	2.50991	0.332545
卢娟	80	2.76	0.98	120	80	5.15		27	54	1.53	23.0681	90	0.888889	0.86	145.6	5.55	3.31545	1.02	0.95	8.17	1.87002	0.347306
卢湘玉	86	2.23	0.97	100	70	5.07		31	72.5	1.63	27.2874	96	0.895833	0.81	416.8	5.33	3.34636	1.2	1.08	12.29	2.76935	0.327887
郑桂香	80	1.84	1.14	110	70	4.47		27	58	1.59	22.9421	88	0.909091	0.9	319	4.34	2.36364	1.17	0.76	5.44	1.08075	0.378619
张勤	84	1.9	1.24	125	75	4.73		30	67.5	1.64	25.0967	99	0.848485	0.76	273.8	4.99	2.88636	1.56	0.93	6.31	1.3265	0.366278
蔡小兰	85	1.72	1.44	131	80	4.16		28	65	1.7	22.4913	95	0.894737	1.15	295.2	5.05	2.82818	1.5	0.98	11.41	2.10958	0.341105
柯素云	80	2.22	1.12	114	73	4.33		27	58	1.56	23.833	95	0.842105	0.96	239.1	4.83	2.70091	1.11	0.85	7.96	1.53186	0.35808
王晓英	88	1.77	0.94	131	83	4.61		21	71	1.55	29.5525	98	0.897959	1.24	150.6	4.16	2.41545	0.97	0.75	12.03	2.46481	0.333418
陈依妹	82	1.82	1.17	108	77	4.75		35	64	1.63	24.0882	97	0.845361	0.58	242.3	4.38	2.38273	1.09	0.79	12.14	2.56289	0.331545
丘玉清	82	2.66	1.3	140	85	6.59		28	61	1.56	25.0657	94	0.87234	0.72	293.5	6.41	3.90091	1.11	0.94	21.56	6.31468	0.293444
卢丽峰	110	2.47	1.61	110	85	4.49		31	83	1.7	28.7197	120	0.916667	0.86	105.9	4.89	2.15727	1.78	0.89	12.7	2.53436	0.33208
卓小英	102	2.37	1.09	110	75	4.49		28	84	1.65	30.854	112	0.910714	1.52	306.6	4.21	2.04273	1.1	0.77	9.96	1.98757	0.344142
潘燕萍	85	1.72	1.22	101	67	3.95		28	67	1.6	26.1719	96	0.885417	0.84	146.8	4.82	2.81818	1.13	1.01	14.32	2.51396	0.332468
陈淑娟	89	2.87	0.83	112	79	4.65		26	76	1.62	28.959	104	0.855769	1.04	160.41	5.39	3.25545	1.6	1.05	14.91	3.0814	0.322976
江碧辉	85	2.14	0.88	121	78	4.98		25	69	1.55	28.7201	96	0.885417	0.72	219.8	5.52	3.66727	1.6	0.97	10.75	2.37933	0.335131
吕淑艳	87	2.68	1.43	108	64	5.94		29	64	1.59	25.3155	97	0.896907	1.43	246.5	5.38	2.73182	1.2	0.61	16.67	4.40088	0.307598
吴舒均	80	1.96	1.22	119	80	4.27		21	65	1.62	24.7676	89	0.898876	1.01	743.5	4.76	2.64909	1.14	0.86	6.2	1.17662	0.3734
陈妹妹	90	2.28	0.67	108	67	4.19		30	69.5	1.6	27.1484	92	0.978261	1.05	160.4	4.22	2.51364	1.14	0.87	24.12	4.49168	0.306761
温小兰	82	2.35	0.97	120	80	3.42		31	58	1.56	23.833	88	0.931818	1.03	215.5	4.11	2.07182	1.64	0.76	5.62	0.85424	0.39385
陈惠	84	2.12	0.9	127	89	4.84		25	67.6	1.63	25.4432	93	0.903226	0.69	439.9	4.13	2.26636	1	0.81	11.54	2.48238	0.333075
李花	90	1.72	0.9	96	75	5.22		31	80	1.61	30.863	110	0.818182	0.82	261.7	4.42	2.73818	1.23	0.97	20.77	4.81864	0.303916
林群	85	2.9	0.61	114	80	4.82		23	69	1.55	28.7201	96	0.885417	0.32	248.4	3.98	2.05182	1.18	0.93	14.36	3.07623	0.323052
陈玲	86	2.1	0.86	132	89	5.23		23	60.9	1.55	25.3486	93	0.924731	0.75	426.8	5.1	3.28545	1.13	0.9	8.89	2.06643	0.342152
张莹	85	2.46	0.86	128	93	5.2		27	70.8	1.57	28.7233	100	0.85	0.97	532.3	3.5	1.52182	1.09	0.76	8.79	2.03147	0.343022
刘雅双	89	2.12	1.12	129	71	6.15		28	58	1.55	24.1415	90	0.988889	0.69	292.5	5.89	3.80636	1.41	1.06	10.8	2.952	0.324932
蒋婷	82	2.26	0.95	104	61	5.21		32	61	1.57	24.7475	93	0.88172	0.57	180.2	4.93	2.95273	1.26	1.32	9.25	2.14189	0.340338
张华	96	3.61	0.9	124	85	6.06		26	67	1.54	28.251	96	1	0.84	230.5	6.3	3.75909	1.55	1.32	12.6	3.3936	0.318663

## Sheet: PCOS+MS-HTGW
name	WC	TG	HDL	SBP	DBP	FPG		age	weight	height	BMI	hip circumference	WHR	TT	DHEAS	TC	LDL	ApoA	ApoB	FINS	HOMA-IR	QUICK
林丽花	87	1.57	1.16	121	85	4.71		33	67	1.58	26.8386	94	0.925532	0.8	356.2	4.48	2.60636	1.19	0.78	12.57	2.63132	0.330291
李玲玲	85	0.5	1.24	115	92	5.04		23	62	1.58	24.8358	94	0.904255	1.08	135.7	4.17	2.70273	1.07	0.81	7.27	1.62848	0.354706
张春梅	83	1.4	1.23	133	86	4.89		26	65	1.59	25.711	95	0.873684	0.87	262.2	4.03	2.16364	1.09	0.88	8.6	1.86907	0.347333
黄晓丹	80	1.47	1.27	131	83	4.47		24	60	1.61	23.1473	92	0.869565	1.5	472.4	5.57	3.63182	1.58	1.04	7.59	1.50788	0.358961
王滢滢	90	0.62	1.19	130	80	5.45		24	70	1.67	25.0995	94	0.957447	0.74	394.3	3.2	1.72818	1	0.69	15.75	3.815	0.313583
林雍	86	1.28	1.04	138	92	4.97		32	85.5	1.66	31.0277	107	0.803738	0.82	143.1	4.27	2.64818	1.57	0.75	14.05	3.10349	0.322653
陈英英	82	0.74	1.22	123	85	5.06		24	59	1.63	22.2063	90	0.911111	0.74	429.2	4.11	2.55364	1.08	0.64	10.42	2.34334	0.335876
杨帆	84	0.84	1.07	116	85	4.61		28	74	1.6	28.9062	102	0.823529	0.72	437.9	4.28	2.82818	1.16	0.7	17.71	3.62858	0.315737
林小平	80	0.97	1.14	105	76	6.6		28	60	1.62	22.8624	87	0.91954	0.7	88.5	5.32	3.73909	1.15	1.15	16.49	4.83707	0.303763
冯琳	98	1.04	1.13	131	89	4.08		32	85	1.64	31.6032	109	0.899083	0.57	188.6	5.29	3.68727	1.29	0.93	2.73	0.49504	0.434387
江敏燕	96	1.24	0.9	137	89	4.74		28	77	1.63	28.9811	108	0.888889	0.88	318.2	4.01	2.54636	1.02	0.66	14.56	3.06731	0.323184
施琼梅	85	1.53	1.02	137	100	5.4		35	69	1.57	27.993	97	0.876289	1.13	407.9	3.99	2.27455	1.02	0.77	10.86	2.6064	0.330743
林萍	82	1.09	1.16	109	73	5.7		31	62	1.6	24.2188	94	0.87234	0.61	229.2	4.61	2.95455	1	0.75	21.95	5.56067	0.298278

## Sheet: 年龄分组
name	WC	TG	HDL	SBP	DBP	FPG		age	weight	height	BMI	hip circumference	WHR	TT	DHEAS	TC	LDL	ApoA	ApoB	FINS	HOMA-IR	QUICK
陈颖	75	1.07	0.99	108	63	4.29		21	55	1.68	19.487	88	0.852273	0.84	289.2	3.58	2.10364	1.2	0.64	5.71	1.08871	0.378162
林升	82	0.8	1.42	100	93	4.64		20	65	1.62	24.7676	97	0.845361	0.84	448.1	4.98	3.19636	2.21	0.86	5.06	1.04348	0.380816
潘美英	76	0.68	1.79	118	82	5.03		24	56	1.65	20.5693	89	0.853933	1.31	210	5.26	3.16091	1.1	0.99	6.52	1.45758	0.360869
吴芳	85	0.52	2.19	110	73	5.2		22	63	1.6	24.6094	97	0.876289	0.49	262.6	5.95	3.52364	1.82	0.91	4.14	0.9568	0.386358
李玲玲	85	0.5	1.24	115	92	5.04		23	62	1.58	24.8358	94	0.904255	1.08	135.7	4.17	2.70273	1.07	0.81	7.27	1.62848	0.354706
王舒婷	90	0.84	1.18	120	75	5.03		20	66	1.55	27.4714	100	0.9	0.68	220.9	5.17	3.60818	1.01	0.78	12.77	2.8548	0.326474
施成	73	0.3	1.57	115	65	5.1		20	63	1.66	22.8625	101	0.722772	1.01	233.1	3.75	2.04364	1.41	0.6	5.15	1.16733	0.373881
陈丽玉	70	0.34	1.77	122	75	4.42		22	48.5	1.59	19.1844	86	0.813953	1.29	266	4.64	2.71545	1.56	0.78	2.3	0.451822	0.442004
黄晓丹	80	1.47	1.27	131	83	4.47		24	60	1.61	23.1473	92	0.869565	1.5	472.4	5.57	3.63182	1.58	1.04	7.59	1.50788	0.358961
陈炎清	72	0.54	2.08	136	72	4.86		24	52	1.65	19.1001	85	0.847059	0.47	159.4	4	1.67455	1.47	0.63	6.55	1.4148	0.362562
林淋	64	0.44	1.17	119	70	4.69		21	48	1.58	19.2277	84	0.761905	0.78	167.4	4.39	3.02	1.18	0.74	9.78	2.03859	0.342843
郑静薇	97	1.38	1.54	119	82	5.15		22	66	1.7	22.8374	107	0.906542	0.9	315	3.24	1.07273	1.27	0.72	13.25	3.03278	0.323698
孙丽英	65	1.22	1.8	126	60	4.94		22	45	1.56	18.4911	83	0.783133	1.13	420	4.64	2.28545	1.6	0.96	4.59	1.00776	0.383023
林雨露	69	0.75	2	113	68	5.22		23	49	1.55	20.3954	85	0.811765	0.2	191	5.04	2.69909	2	0.78	3.24	0.75168	0.402659
何风云	90	1.05	2.8	127	80	4.06		22	78	1.65	28.6501	107	0.841121	1.31	222.7	6.14	2.86273	2.24	0.97	6.47	1.16748	0.373873
唐文婷	66	0.8	1.62	110	70	4.42		23	47	1.6	18.3594	81	0.814815	1	389.6	3.44	1.45636	1.01	0.54	4.27	0.838818	0.395082
卢琳	73	0.69	1.01	110	75	4.37		22	52	1.57	21.0962	87	0.83908	0.78	265.3	4.31	2.98636	1.01	0.72	4.11	0.798253	0.398471
陈梦莹	64	0.69	1.57	98	60	3.88		21	50	1.6	19.5312	84	0.761905	0.79	190.4	3.89	2.00636	1.21	0.55	1.53	0.26384	0.492903
王晓英	88	1.77	0.94	131	83	4.61		21	71	1.55	29.5525	98	0.897959	1.24	150.6	4.16	2.41545	0.97	0.75	12.03	2.46481	0.333418
林吓丽	69	0.4	1.32	129	88	3.13		21	42.5	1.54	17.9204	81	0.851852	1.11	323.7	4.28	2.77818	1.09	0.58	9.36	1.30208	0.367364
魏婷婷	63	0.56	1.41	105	71	4.47		23	46.5	1.61	17.9391	84	0.75	1.22	349.8	4.47	2.80545	1.15	0.61	3.14	0.623813	0.416231
吴小轩	67	0.5	1.23	108	68	4.37		21	44	1.52	19.0443	81	0.82716	0.48	155.2	4.08	2.62273	1.07	0.61	2.65	0.514689	0.43122
陈新颖	80	0.48	1.45	121	72	4.61		20	63	1.64	23.4236	95	0.842105	1.08	182.8	4	2.33182	1.07	0.62	2.07	0.42412	0.447439
元美玲	81	1.11	1.77	113	77	4.44		23	64	1.63	24.0882	94	0.861702	0.88	487.9	4.71	2.43545	1.13	0.63	13.46	2.65611	0.329848
李林妹	67	0.86	1.7	120	80	3.84		24	47	1.55	19.563	81	0.82716	0.95	352	5.23	3.13909	1.1	0.7	0.68	0.116053	0.598046
陈晶晶	71	0.82	1.78	118	70	3.59		20	54	1.64	20.0773	93	0.763441	1.36	729.7	4.36	2.20727	1.17	0.57	8.75	1.39611	0.363323
林丹娜	75	1.47	1.04	123	78	4.85		20	59	1.62	22.4813	95	0.789474	1.13	515	5.15	3.44182	1	0.79	16.28	3.50924	0.317192
王滢滢	90	0.62	1.19	130	80	5.45		24	70	1.67	25.0995	94	0.957447	0.74	394.3	3.2	1.72818	1	0.69	15.75	3.815	0.313583
胡佳茜	78	1.08	1.66	103	66	3.99		23	60.5	1.62	23.0529	90	0.866667	1.75	432.5	5.49	3.33909	1.24	0.97	4.54	0.805093	0.397883
蔡首燕	111	1.01	1.13	114	68	4.44		24	79	1.67	28.3266	124	0.895161	0.5	252.5	4.5	2.91091	0.83	0.94	10.42	2.05621	0.342404
吴敏	75	1.58	1.28	107	63	4.59		22	55	1.62	20.9572	85	0.882353	1.06	567.4	4.82	2.82182	0.83	0.84	13.49	2.75196	0.328181
周倩	59	0.72	1.56	116	71	4.61		22	46	1.52	19.91	81	0.728395	0.79	287.7	3.52	1.63273	1.01	0.54	3.96	0.81136	0.397351
王云钦	64	0.53	1.43	120	84	4.9		24	39	1.53	16.6603	79	0.810127	0.75	304.5	4.06	2.38909	0.9	0.69	3.32	0.723022	0.405415
郑晓烨	68	0.8	1.29	106	69	3.32		20	57	1.7	19.7232	84	0.809524	0.66	295.8	4.01	2.35636	1.31	0.61	3.85	0.568089	0.423393
柳小青	64	1.38	1.24	108	71	4.33		23	50	1.55	20.8117	77	0.831169	0.75	373.9	4.08	2.21273	1.31	0.68	4.92	0.946827	0.387038
汪文玲	88	1.5	0.99	123	63	5.15		22	78	1.65	28.6501	105	0.838095	0.78	361.1	4.07	2.39818	1.41	0.64	12.81	2.93207	0.325243
蔡敏璇	84	0.89	0.97	105	71	3.74		22	74.4	1.62	28.3493	99	0.848485	0.78	157.1	3.84	2.46545	1.39	0.61	19.66	3.26793	0.320335
林晨舒	106	1.03	1.21	121	76	4.64		24	85	1.72	28.7317	120	0.883333	0.92	384.4	6.69	5.01182	1.35	1.06	6.9	1.42293	0.362235
何青青	71	0.75	1.38	122	72	4.57		20	55	1.67	19.721	86	0.825581	1.1	346.4	5.17	3.44909	1.13	0.82	6.52	1.32428	0.366376
付顺莲	62	0.68	1.09	91	57	4.54		20	43	1.55	17.898	82	0.756098	0.31	134.5	3.2	1.80091	0.9	0.48	2.66	0.536729	0.427861
林花田	61	0.5	1.5	116	67	4.25		22	49	1.66	17.782	83	0.73494	1.35	472.7	5.56	3.83273	0.88	0.75	3.74	0.706444	0.407078
陈英英	82	0.74	1.22	123	85	5.06		24	59	1.63	22.2063	90	0.911111	0.74	429.2	4.11	2.55364	1.08	0.64	10.42	2.34334	0.335876
兰兰香	93	0.72	1.45	114	66	5.04		24	72	1.62	27.4348	95	0.978947	0.87	167.9	4.86	3.08273	1.04	0.74	12.89	2.88736	0.32595
卓美娇	90	0.98	1.52	119	77	3.84		20	71	1.63	26.7229	95	0.947368	1.55	363.3	4.7	2.73455	1.1	0.77	4.65	0.7936	0.398874
张沁心	82	0.71	1.13	112	77	4.34		20	65	1.63	24.4646	89	0.921348	1.39	552.5	4.33	2.87727	0.95	0.72	10.65	2.05427	0.342453
吴舒均	80	1.96	1.22	119	80	4.27		21	65	1.62	24.7676	89	0.898876	1.01	743.5	4.76	2.64909	1.14	0.86	6.2	1.17662	0.3734
翁秀华	67	0.62	1.97	120	86	4.9		24	47	1.55	19.563	78	0.858974	0.72	336.9	5.83	3.57818	1.12	0.78	3.66	0.797067	0.398573
陈细烟	63	1.48	1.99	120	71	4.92		23	41	1.54	17.2879	81	0.777778	0.68	99.1	5.84	3.17727	2.15	1.01	5.31	1.16112	0.374205
林群	85	2.9	0.61	114	80	4.82		23	69	1.55	28.7201	96	0.885417	0.32	248.4	3.98	2.05182	1.18	0.93	14.36	3.07623	0.323052
林莉萍	70	0.87	1.01	106	66	4.41		24	47.2	1.6	18.4375	84	0.833333	1.24	357.7	4.18	2.77455	0.85	0.63	3.96	0.77616	0.400415
陈玲	86	2.1	0.86	132	89	5.23		23	60.9	1.55	25.3486	93	0.924731	0.75	426.8	5.1	3.28545	1.13	0.9	8.89	2.06643	0.342152
刘晓丹	74	0.58	1.29	122	83	5.45		24	50.1	1.52	21.6846	84	0.880952	0.54	280.1	5.49	3.93636	0.97	0.71	4.28	1.03671	0.381226
陈荔娟	74	1.53	1	105	75	4.83		23	48.5	1.46	22.7529	85	0.870588	1.21	367.4	3.4	1.70455	0.58	1.2	3.04	0.652587	0.412866
连碧仙	100	1.11	0.83	118	78	5.19		22	80	1.61	30.863	110	0.909091	0.68	142.7	3.53	2.19545	0.91	0.66	7.89	1.81996	0.348734
俞丽云	78	0.6	0.75	108	70	5.33		23	60	1.58	24.0346	90	0.866667	0.77	324	2.99	1.96727	0.67	0.5	1.84	0.435876	0.445074
陈敏	65	0.58	1.84	103	58	4.1		22	46	1.63	17.3134	82	0.792683	1	433.7	5.71	3.60636	0.96	0.69	1.25	0.227778	0.508915
张文敏	76	0.82	1.22	116	71	4.76		24	55	1.61	21.2183	87	0.873563	1.29	276.8	3.3	1.70727	0.65	0.45	5.67	1.19952	0.372237
蔡丹丹	77	1.64	1.03	129	78	4.84		21	55	1.57	22.3133	89	0.865169	0.42	234.5	4.55	2.77455	1.21	0.79	5.96	1.28206	0.368275
曾美兰	76	0.77	1.29	94	57	4.78		22	57	1.62	21.7193	86	0.883721	0.86	345.9	4.04	2.4	1	0.53	5.29	1.12383	0.376201
林丽萍	70	1.78	1.23	120	84	3.71		22	52	1.59	20.5688	90	0.777778	0.85	256.7	5.23	3.19091	1.37	0.89	4.5	0.742	0.403574
黄桂芳	98.5	1.99	0.78	121	87	6.16		26	80	1.69	28.0102	101	0.975248	0.85	391.4	5.57	3.88545	1.3	0.99	24.02	6.57614	0.291934
范晓婕	86	0.86	1.05	105	60	3.62		27	60	1.58	24.0346	98	0.877551	0.9	291.2	3.45	2.00909	1.01	0.63	8.7	1.39973	0.363174
陈宝英	106	0.65	1.14	110	68	4.81		27	76	1.6	29.6875	107	0.990654	0.66	145.6	4.94	3.50455	1.74	1.05	17.69	3.78173	0.313957
吴素珍	84	1.56	1.02	105	65	5.46		28	54	1.55	22.4766	92	0.913043	1.16	219.6	4.57	2.84091	1.58	0.99	27.97	6.78739	0.290769
张小燕	85	1.15	0.99	110	70	5.15		26	63	1.6	24.6094	97	0.876289	0.87	374.1	4.32	2.80727	1.34	0.79	12.71	2.90918	0.325603
吴如洪	80	1.02	0.87	100	60	4.69		27	50	1.58	20.0288	89	0.898876	1.62	180.4	3.87	2.53636	1.91	0.7	6.77	1.41117	0.362709
林淑君	82	0.87	1.21	110	70	4		26	63	1.62	24.0055	91	0.901099	1.55	343.7	3.32	1.71455	1.35	0.62	8.06	1.43289	0.361838
陈章琴	78	0.59	1.68	100	60	4.04		26	53	1.56	21.7784	90	0.866667	2.61	427.7	3.62	1.67182	1.2	0.65	2.13	0.382453	0.456614
林慧冬	76	0.9	1.39	120	70	5.02		25	65	1.7	22.4913	85	0.894118	2.49	278.5	5.77	3.97091	1.82	0.96	3.22	0.718418	0.405872
丁宁	80	0.58	1.14	100	70	4.65		27	66	1.58	26.4381	96	0.833333	1.2	497.4	4.99	3.58636	1.44	1.01	16.95	3.503	0.317269
卢娟	80	2.76	0.98	120	80	5.15		27	54	1.53	23.0681	90	0.888889	0.86	145.6	5.55	3.31545	1.02	0.95	8.17	1.87002	0.347306
张玲玲	77	1.41	1.1	115	72	4.74		28	54	1.6	21.0938	87	0.885057	1.03	209.4	6.15	4.40909	1.3	0.97	5.52	1.16288	0.374113
李讷	82	1.03	1.87	110	70	4.85		25	63	1.62	24.0055	91	0.901099	1.55	160.2	5.11	2.77182	1.86	0.8	5.2	1.12089	0.376362
陈爱娇	69	1.24	0.92	110	70	4.46		27	46	1.52	19.91	78	0.884615	1.05	244	4.93	3.44636	1.31	0.86	7.93	1.5719	0.356649
兰榕军	81	1.51	1.62	118	80	4.62		27	59	1.6	23.0469	95	0.852632	1.18	241.1	5.96	3.65364	1.94	0.93	9.4	1.93013	0.345657
郑桂香	80	1.84	1.14	110	70	4.47		27	58	1.59	22.9421	88	0.909091	0.9	319	4.34	2.36364	1.17	0.76	5.44	1.08075	0.378619
曾巧玲	73	1.36	1.72	100	65	4.38		25	55	1.6	21.4844	85	0.858824	0.76	192.2	5.03	2.69182	1.7	0.84	5.75	1.11933	0.376447
林立	83	1.16	0.9	104	63	3.97		26	57	1.48	26.0226	89	0.932584	0.81	173	5.94	4.51273	1.51	1.01	11.84	2.0891	0.341598
卓小英	102	2.37	1.09	110	75	4.49		28	84	1.65	30.854	112	0.910714	1.52	306.6	4.21	2.04273	1.1	0.77	9.96	1.98757	0.344142
陈艺莹	81	2.09	1.39	110	70	4.64		28	53	1.5	23.5556	88	0.920455	0.78	228.3	6.62	4.28	1.69	1.18	18.11	3.73468	0.314494
张春梅	83	1.4	1.23	133	86	4.89		26	65	1.59	25.711	95	0.873684	0.87	262.2	4.03	2.16364	1.09	0.88	8.6	1.86907	0.347333
陈美香	65	1.45	1.45	96	63	4.69		26	45	1.6	17.5781	84	0.77381	1.04	203.3	5.32	3.21091	1.54	0.78	5.92	1.23399	0.37054
薛烨	75	1.29	1.5	116	76	5.53		27	56	1.63	21.0772	87	0.862069	0.8	301	3.89	1.80364	1.23	0.71	7.09	1.74256	0.351044
林珠金	73	0.43	1.55	124	79	4.82		27	50	1.48	22.8269	89	0.820225	1.08	152	5.07	3.32455	1.54	0.95	3.91	0.837609	0.395179
魏建萍	81	1.36	1.01	118	71	5.23		28	63	1.58	25.2363	95	0.852632	0.89	308.1	3.38	1.75182	1.04	0.69	8.72	2.02692	0.343137
孙惠娟	95	2	1.34	115	70	5.29		25	92	1.7	31.8339	109	0.87156	0.81	240.5	5.62	3.37091	1.24	1	23.59	5.54627	0.298378
王华琴	73	1.92	1.45	120	82	4.81		26	60	1.67	21.5139	91	0.802198	0.85	242	4.94	2.61727	1.26	0.89	8.3	1.77436	0.350079
蔡小兰	85	1.72	1.44	131	80	4.16		28	65	1.7	22.4913	95	0.894737	1.15	295.2	5.05	2.82818	1.5	0.98	11.41	2.10958	0.341105
江霞	80	0.6	1.21	106	73	4.35		26	64	1.68	22.6757	92	0.869565	0.4	173.2	5.4	3.91727	1.17	1.01	6.78	1.3108	0.366974
柯素云	80	2.22	1.12	114	73	4.33		27	58	1.56	23.833	95	0.842105	0.96	239.1	4.83	2.70091	1.11	0.85	7.96	1.53186	0.35808
林娜	73	0.96	1.54	119	73	4.5		25	45	1.52	19.4771	82	0.890244	1.12	385.1	5.17	3.19364	1.23	0.82	8.98	1.796	0.349435
胡丽珠	66	0.7	1.64	94	60	5.12		27	41.5	1.58	16.6239	83	0.795181	1.2	361.9	5.17	3.21182	1.18	0.64	6.34	1.4427	0.36145
陈微	72	0.72	1.33	95	65	4.12		25	46.5	1.54	19.607	86	0.837209	0.87	411.8	4.78	3.12273	1.23	0.71	2.13	0.390027	0.454845
郑婷婷	68	0.62	1.27	110	80	4.46		26	55	1.65	20.202	96	0.708333	1.6	82.1	4.18	2.62818	1.11	0.61	4.29	0.850373	0.394156
黄嫩梅	69	2.79	0.95	115	65	5.4		27	51	1.6	19.9219	82	0.841463	0.59	202.3	3.76	1.54182	1.02	0.75	5.13	1.2312	0.370675
阮茜	78	1.67	1.5	112	80	4.64		29	53.5	1.57	21.7047	92	0.847826	1.18	382.5	6.29	4.03091	1.01	0.96	10.77	2.22101	0.338523
姜妍妍	77	0.57	1.16	120	80	4.3		27	59	1.72	19.9432	91	0.846154	1.37	336.4	3.91	2.49091	1.05	0.59	3.05	0.582889	0.4214
丘玉清	82	2.66	1.3	140	85	6.59		28	61	1.56	25.0657	94	0.87234	0.72	293.5	6.41	3.90091	1.11	0.94	21.56	6.31468	0.293444
丁雅华	74	1.24	1.58	104	71	4.45		27	54	1.62	20.5761	92	0.804348	1.23	235.9	5.32	3.17636	1	0.77	2.46	0.486533	0.435812
李丹楠	82	1.19	1.51	116	79	4.32		29	56	1.61	21.6041	91	0.901099	0.88	357.9	6.31	4.25909	1	0.9	5.95	1.1424	0.375196
刘娟娟	75	0.54	1.49	114	65	4.84		28	59	1.65	21.6713	91	0.824176	0.31	326	3.67	1.93455	1.04	0.52	10.1	2.17262	0.339623
陈小青	75	1.24	1.53	116	67	5.03		28	56	1.55	23.3091	88	0.852273	1.19	426	5.47	3.37636	0.91	0.76	17.15	3.83398	0.313371
许美容	78	0.67	1.38	114	60	5.62		26	60.5	1.6	23.6328	90	0.866667	0.66	342.7	3.96	2.27545	1.24	0.82	4.97	1.2414	0.370183
郑洲	78	0.52	1.62	117	64	4.05		29	52	1.58	20.83	90	0.866667	0.99	275.8	3.91	2.05364	1.18	0.73	8.57	1.5426	0.357691
郑梅琴	75	1.73	1.34	119	78	4.14		28	50.5	1.57	20.4876	84	0.892857	0.44	433.2	5.72	3.59364	1.01	1.03	12.41	2.28344	0.337149
潘燕萍	85	1.72	1.22	101	67	3.95		28	67	1.6	26.1719	96	0.885417	0.84	146.8	4.82	2.81818	1.13	1.01	14.32	2.51396	0.332468
何娟娟	75	0.74	1.22	98	61	5.08		27	55	1.57	22.3133	88	0.852273	0.76	452.4	3.32	1.76364	1.1	0.75	4.14	0.93472	0.387877
尤金菊	77	0.7	1.93	127	88	3.91		25	54	1.6	21.0938	90	0.855556	1.36	315.5	4.49	2.24182	1.17	0.79	6.93	1.20428	0.371999
杨秀焰	110	1.02	1.2	118	71	2.56		27	71	1.59	28.0843	115	0.956522	1.1	341.1	5.34	3.67636	0.87	1.06	8.69	0.988729	0.384241
林雪芬	77	1.31	1.59	130	82	4.13		26	58.5	1.55	24.3496	89	0.865169	1.03	296.9	5.51	3.32455	1.36	1.02	9.24	1.69605	0.352498
赵苏	74	1.03	1.53	101	69	3.81		27	61.5	1.61	23.7259	89	0.831461	1.26	416.7	6.43	4.43182	1.47	0.91	2.21	0.374227	0.458592
陈秋榕	79	1.28	1.29	110	63	4.68		27	58.5	1.53	24.9904	92	0.858696	1.33	536.4	4.2	2.32818	1.03	0.88	6.1	1.2688	0.368888
程华莺	77	1.45	0.96	121	74	6.95		26	73	1.67	26.1752	97	0.793814	0.89	215.7	4.5	2.88091	0.83	0.94	16.7	5.15844	0.301207
林琼珊	61	0.67	1.2	95	62	4.68		25	49	1.56	20.1348	83	0.73494	0.81	373.1	4.61	3.10545	1.56	0.76	5.29	1.10032	0.377505
陈淑娟	89	2.87	0.83	112	79	4.65		26	76	1.62	28.959	104	0.855769	1.04	160.41	5.39	3.25545	1.6	1.05	14.91	3.0814	0.322976
张莹	66	1.03	1.24	109	78	4.51		27	50.5	1.62	19.2425	88	0.75	1.13	375.7	3.84	2.13182	1.34	0.6	5.22	1.04632	0.380645
陈柳珠	68	0.89	1.1	121	87	4.12		27	45.5	1.5	20.2222	78	0.871795	1.04	224.6	3.43	1.92545	1.26	0.55	2.09	0.382702	0.456555
吴美选	70	1.92	1.43	123	76	4.62		27	51	1.58	20.4294	86	0.813953	1.15	279.7	5.41	3.10727	1.75	0.89	5.08	1.04309	0.380839
林美艳	61	0.48	1.39	124	74	3.88		27	43	1.53	18.369	79	0.772152	1.05	235.9	4.85	3.24182	1.34	0.71	3.47	0.598382	0.419387
周波弟	62	0.76	1.53	123	72	4.01		27	43	1.56	17.6693	76	0.815789	1.09	158.4	4.02	2.14455	1.27	0.62	1.06	0.188916	0.530864
胡雅娟	67	0.62	1.23	117	71	4.38		28	58	1.58	23.2335	89	0.752809	0.91	260.7	3.64	2.12818	1.13	0.61	3.34	0.650187	0.413139
李晓英	73	2.89	1.74	125	80	3.8		28	59.5	1.53	25.4176	89	0.820225	0.92	262.1	5.23	2.17636	1	1.18	7.54	1.27342	0.368673
刘秀敏	66	1.3	1.36	116	68	4.97		27	43.6	1.51	19.122	83	0.795181	0.78	229.3	4.62	2.66909	1.47	0.72	17.2	3.79929	0.313759
李文梅	76	1.29	1.54	102	72	4.57		29	49	1.57	19.8791	87	0.873563	0.8	384.8	4.49	2.36364	1.05	0.77	2.4	0.487467	0.435654
江碧辉	85	2.14	0.88	121	78	4.98		25	69	1.55	28.7201	96	0.885417	0.72	219.8	5.52	3.66727	1.6	0.97	10.75	2.37933	0.335131
林燕	71	0.78	1.28	106	76	4.51		27	47.5	1.54	20.0287	86	0.825581	0.84	202.2	5.01	3.37545	1.11	0.85	0.42	0.0841867	0.652444
吕淑艳	87	2.68	1.43	108	64	5.94		29	64	1.59	25.3155	97	0.896907	1.43	246.5	5.38	2.73182	1.2	0.61	16.67	4.40088	0.307598
谢铃影	67	0.38	1.41	114	76	5.36		28	50	1.52	21.6413	86	0.77907	1.47	432.2	4.57	2.98727	1.06	0.72	8.33	1.98439	0.344224
王倩	56	0.55	1.46	116	75	4.4		25	56	1.6	21.875	68	0.823529	0.92	386	4.15	2.44	0.94	0.7	10.24	2.00249	0.343758
黄海燕	73	1.32	1.06	110	57	4.37		26	49	1.5	21.7778	85	0.858824	0.4	266.1	5.51	3.85	1.31	1	6.42	1.24691	0.36992
杨帆	84	0.84	1.07	116	85	4.61		28	74	1.6	28.9062	102	0.823529	0.72	437.9	4.28	2.82818	1.16	0.7	17.71	3.62858	0.315737
林小平	80	0.97	1.14	105	76	6.6		28	60	1.62	22.8624	87	0.91954	0.7	88.5	5.32	3.73909	1.15	1.15	16.49	4.83707	0.303763
郑玲	74	1.13	2.35	117	76	6.14		29	48	1.55	19.9792	82	0.902439	0.45	195.3	6.14	3.27636	1.31	1.03	4.94	1.34807	0.365341
林婷	77	1.31	1.17	117	80	5.01		28	58	1.63	21.83	85	0.905882	1.06	268.3	4.1	2.33455	0.93	0.56	12.69	2.82564	0.32695
黄新英	84	0.96	1.31	117	67	4.56		29	60.2	1.6	23.5156	90	0.933333	0.75	229.2	5.85	4.10364	1.3	0.92	12.11	2.45429	0.333625
黄淋芳	63	1.27	1.69	114	56	4.44		28	47	1.63	17.6898	82	0.768293	0.51	244.2	4.41	2.14273	0.85	0.57	6.27	1.23728	0.370381
林明艳	72	1.32	1.52	121	83	4.72		27	48.5	1.53	20.7185	84	0.857143	0.54	296	5.43	3.31	1.16	0.84	5.34	1.12021	0.376399
陈烨	74	0.77	1.79	111	61	4.42		26	48	1.55	19.9792	82	0.902439	1.4	540.6	4.67	2.53	2.2	0.92	6.76	1.32796	0.366214
陈惠	84	2.12	0.9	127	89	4.84		25	67.6	1.63	25.4432	93	0.903226	0.69	439.9	4.13	2.26636	1	0.81	11.54	2.48238	0.333075
吴文英	72	1.56	1.22	111	73	5		29	42	1.45	19.9762	81	0.888889	0.49	259.8	4.42	2.49091	0.9	0.69	6.14	1.36444	0.364643
方丽随	66	0.45	1.59	121	69	4.79		26	49	1.6	19.1406	81	0.814815	0.63	154.4	4.82	3.02545	0.9	0.64	4.74	1.00909	0.382938
刘霞	83	0.69	1.07	113	78	4.62		26	58	1.58	23.2335	87	0.954023	1.19	335.3	4.61	3.22636	0.8	0.66	3.89	0.798747	0.398428
许亚珊	80	0.8	0.98	121	74	4.5		25	54	1.59	21.3599	90	0.888889	1.19	416.5	5.23	3.88636	1.03	0.84	8.69	1.738	0.351185
尹艳	65	1.03	1.26	125	84	4.92		25	48.9	1.61	18.865	79	0.822785	1.18	408.9	4.42	2.69182	1.13	0.68	4.3	0.940267	0.387491
江慧芳	78	1.23	1.17	103	77	4.54		29	56.5	1.61	21.797	94	0.829787	0.89	235.3	5.75	4.02091	1.22	0.94	4.26	0.859573	0.393432
江敏燕	96	1.24	0.9	137	89	4.74		28	77	1.63	28.9811	108	0.888889	0.88	318.2	4.01	2.54636	1.02	0.66	14.56	3.06731	0.323184
陈碧珍	82	1.31	1.8	103	64	4.94		25	58	1.56	23.833	90	0.911111	0.92	409.2	6.23	3.83455	1.43	0.9	6.14	1.34807	0.365341
张莹	85	2.46	0.86	128	93	5.2		27	70.8	1.57	28.7233	100	0.85	0.97	532.3	3.5	1.52182	1.09	0.76	8.79	2.03147	0.343022
李秀英	65	0.41	1.8	117	72	5.3		25	44	1.6	17.1875	77	0.844156	0.15	186.1	4.63	2.64364	0.65	0.47	3.07	0.723156	0.405402
刘雅双	89	2.12	1.12	129	71	6.15		28	58	1.55	24.1415	90	0.988889	0.69	292.5	5.89	3.80636	1.41	1.06	10.8	2.952	0.324932
陈婷婷	64	0.51	1.48	117	84	4.55		25	46	1.64	17.1029	77	0.831169	0.89	349.1	4.29	2.57818	1.01	0.52	3.61	0.730022	0.404729
张华	96	3.61	0.9	124	85	6.06		26	67	1.54	28.251	96	1	0.84	230.5	6.3	3.75909	1.55	1.32	12.6	3.3936	0.318663
吴艳玲	73	3.42	0.99	106	64	5.22		26	51	1.59	20.1733	89	0.820225	0.84	292	5.59	3.04545	1.54	1.11	10.41	2.41512	0.334404
黄均	76	1	0.95	100	70	4.69		33	50	1.54	21.0828	86.5	0.878613	1	127.6	4.39	2.98545	1.12	0.83	11.88	2.47632	0.333193
林丽花	87	1.57	1.16	121	85	4.71		33	67	1.58	26.8386	94	0.925532	0.8	356.2	4.48	2.60636	1.19	0.78	12.57	2.63132	0.330291
温跃青	90	1.36	1.05	120	80	4.1		30	65	1.6	25.3906	98	0.918367	0.87	297.1	5.14	3.47182	1.45	1.1	12.26	2.23404	0.338232
沈云	104	2.44	0.93	100	60	4.71		31	75	1.55	31.2175	109	0.954128	0.83	266.4	4.98	2.94091	1.26	1.01	11.99	2.50991	0.332545
吕莺	77	1.77	1.32	120	70	4.18		31	60	1.68	21.2585	94	0.819149	0.97	380.4	5.5	3.37545	1.66	0.97	4.91	0.912169	0.389479
郑秀英	90	1.07	1.97	115	80	3.7		33	71.5	1.57	29.0073	95	0.947368	1.38	386.6	4.5	2.04364	1.58	0.68	10.32	1.69707	0.352466
张晓华	91	0.82	1.67	100	60	5.79		32	66	1.6	25.7812	100	0.91	1.2	250.8	6.13	4.08727	1.48	1.16	17.6	4.52907	0.306423
卢湘玉	86	2.23	0.97	100	70	5.07		31	72.5	1.63	27.2874	96	0.895833	0.81	416.8	5.33	3.34636	1.2	1.08	12.29	2.76935	0.327887
赵晓芳	75	0.57	1.79	115	65	4.49		32	54	1.6	21.0938	87	0.862069	1.12	189.1	3.65	1.60091	1.56	0.58	4.31	0.860084	0.393392
沈珊	78	0.64	2.33	125	60	4.85		34	57	1.56	23.4221	95	0.821053	0.75	336.1	5.11	2.48909	1.88	0.88	8.34	1.79773	0.349384
许建华	75	0.53	1.8	110	70	4.78		30	60	1.65	22.0386	87	0.862069	0.98	347.7	4.06	2.01909	1.41	0.6	3.11	0.660702	0.411953
陈凤舟	76	1.22	1.17	115	75	4.15		30	57	1.62	21.7193	85	0.894118	1.25	344.9	4.95	3.22545	1.03	0.9	4.57	0.842911	0.394752
陈四兰	77	0.7	1.8	102	62	4.69		30	57	1.63	21.4536	91	0.846154	2.01	200.1	6.16	4.04182	1.6	0.63	11.74	2.44714	0.333766
曾于弼	73	0.6	1.15	114	71	4.97		30	47	1.58	18.8271	87	0.83908	0.6	241	5.64	4.21727	1.04	0.68	4.87	1.07573	0.378909
施恩	79	0.88	1.38	111	74	5.13		31	52	1.57	21.0962	89	0.88764	0.41	353.4	5.61	3.83	1.18	0.77	5.98	1.36344	0.364685
林霞	78	1.38	1.13	114	69	5.03		30	55	1.54	23.1911	85	0.917647	0.94	146.7	5	3.24273	1.03	0.78	4.38	0.979173	0.384865
林喜雪	69	1.74	1.35	103	67	4.61		33	49	1.56	20.1348	80	0.8625	0.41	485.5	5.66	3.51909	1.01	0.88	2.98	0.610569	0.417852
曾肖岩	69	1.01	1.67	114	72	3.29		30	49	1.66	17.782	83	0.831325	0.91	457.9	4.5	2.37091	1.09	0.69	5.98	0.874409	0.392285
卢丽峰	110	2.47	1.61	110	85	4.49		31	83	1.7	28.7197	120	0.916667	0.86	105.9	4.89	2.15727	1.78	0.89	12.7	2.53436	0.33208
张勤	84	1.9	1.24	125	75	4.73		30	67.5	1.64	25.0967	99	0.848485	0.76	273.8	4.99	2.88636	1.56	0.93	6.31	1.3265	0.366278
陈爱清	63	1.09	1.29	85	50	3.68		30	44	1.6	17.1875	79	0.797468	0.91	137.1	3.42	1.63455	0.97	0.54	3.16	0.516836	0.430885
肖玉贞	86	1.58	1.33	114	73	4.76		34	57	1.48	26.0226	95	0.905263	0.99	430.5	5.33	3.28182	1.09	1.16	6.88	1.4555	0.36095
林冰娜	67	1.61	1.36	100	68	4.23		30	50	1.53	21.3593	81	0.82716	0.84	336.7	4.76	2.66818	0.84	1.03	8.27	1.55476	0.357255
徐华	80	1.2	1.58	119	80	4.03		30	57	1.56	23.4221	90	0.888889	1.09	354.8	4.96	2.83455	1.34	0.85	10.95	1.96127	0.344829
林雍	86	1.28	1.04	138	92	4.97		32	85.5	1.66	31.0277	107	0.803738	0.82	143.1	4.27	2.64818	1.57	0.75	14.05	3.10349	0.322653
赖玉琴	99	1.56	0.91	109	71	4.87		34	70	1.6	27.3438	108	0.916667	0.65	138.2	4.14	2.52091	1.6	0.75	4.09	0.885258	0.391462
黄晓萍	76	0.53	1.92	120	70	4.38		33	47.5	1.6	18.5547	90	0.844444	1.08	318.2	4.17	2.00909	1	0.6	1.12	0.218027	0.513884
魏丽娇	88	0.81	1.46	113	79	4.77		33	74	1.69	25.9095	103	0.854369	0.9	277.8	5	3.17182	1.09	0.79	3.71	0.78652	0.399494
陈妹妹	90	2.28	0.67	108	67	4.19		30	69.5	1.6	27.1484	92	0.978261	1.05	160.4	4.22	2.51364	1.14	0.87	24.12	4.49168	0.306761
赖婷婷	90	1.46	1.62	110	78	4.5		30	70	1.58	28.0404	93	0.967742	0.75	155.6	4.63	2.34636	0.99	0.7	5.63	1.126	0.376082
温小兰	82	2.35	0.97	120	80	3.42		31	58	1.56	23.833	88	0.931818	1.03	215.5	4.11	2.07182	1.64	0.76	5.62	0.85424	0.39385
乔宇	87	1.17	1.13	107	56	4.79		30	60	1.6	23.4375	90	0.966667	0.83	160	5.63	3.96818	1.2	0.92	23.87	5.08166	0.301799
石开玉	72	1.06	1.15	119	70	4.81		30	47	1.52	20.3428	85	0.847059	0.59	313.6	4.92	3.28818	1.12	0.8	7.08	1.51355	0.358751
冯琳	98	1.04	1.13	131	89	4.08		32	85	1.64	31.6032	109	0.899083	0.57	188.6	5.29	3.68727	1.29	0.93	2.73	0.49504	0.434387
陈晓君	73	0.79	1.43	110	64	4.72		32	45.6	1.53	19.4797	84	0.869048	1.5	372.2	4.57	2.78091	1	0.6	1.71	0.35872	0.46249
李花	90	1.72	0.9	96	75	5.22		31	80	1.61	30.863	110	0.818182	0.82	261.7	4.42	2.73818	1.23	0.97	20.77	4.81864	0.303916
林贤妹	68	0.89	1.18	107	64	4.8		30	45	1.48	20.5442	77	0.883117	0.6	136.7	4.42	2.83545	0.86	0.62	5.62	1.19893	0.372266
郑瑾	72	0.5	1.52	114	68	5.1		31	52.5	1.66	19.0521	88	0.818182	1.05	270.4	4.27	2.52273	0.95	0.51	5.3	1.20133	0.372146
林萍	82	1.09	1.16	109	73	5.7		31	62	1.6	24.2188	94	0.87234	0.61	229.2	4.61	2.95455	1	0.75	21.95	5.56067	0.298278
王磊	79	1.59	1.16	109	65	4.77		30	58	1.65	21.3039	95	0.831579	0.81	201.1	6.27	4.38727	1.35	1.01	2.7	0.5724	0.422805
蒋婷	82	2.26	0.95	104	61	5.21		32	61	1.57	24.7475	93	0.88172	0.57	180.2	4.93	2.95273	1.26	1.32	9.25	2.14189	0.340338
俞露	87	1.15	1.11	124	66	4.74		33	59	1.62	22.4813	97	0.896907	0.69	252	5.11	3.47727	0.97	0.8	4.74	0.99856	0.383608
刘依妹	66	0.57	1.3	102	59	4.36		38	50	1.53	21.3593	83	0.795181	0.82	195.4	4.09	2.53091	1.14	0.62	6.95	1.34676	0.365398
陈依妹	82	1.82	1.17	108	77	4.75		35	64	1.63	24.0882	97	0.845361	0.58	242.3	4.38	2.38273	1.09	0.79	12.14	2.56289	0.331545
郑国玉	75	1.03	1.96	122	71	4.79		38	58	1.55	24.1415	88	0.852273	1.01	239.8	6.66	4.23182	1.45	1.2	3.05	0.649311	0.413239
郭宝贞	80	0.96	1.16	119	77	5.46		35	60.5	1.55	25.1821	91	0.879121	1.02	535.4	4	2.40364	1.41	0.65	5.67	1.37592	0.36416
施琼梅	85	1.53	1.02	137	100	5.4		35	69	1.57	27.993	97	0.876289	1.13	407.9	3.99	2.27455	1.02	0.77	10.86	2.6064	0.330743
total	200	41	0.205	20.5
>25	60	8	0.133333	13.3333
25-24.9	93	19	0.204301	20.4301
30-34.9	42	12	0.285714	28.5714
>=35	5	2	0.4	40

## Sheet: BMI分组
name	WC	TG	HDL	SBP	DBP	FPG		age	weight	height	BMI	hip circumference	WHR	TT	DHEAS	TC	LDL	ApoA	ApoB	FINS	HOMA-IR	QUICK
陈美香	65	1.45	1.45	96	63	4.69		26	45	1.6	17.5781	84	0.77381	1.04	203.3	5.32	3.21091	1.54	0.78	5.92	1.23399	0.37054
孙丽英	65	1.22	1.8	126	60	4.94		22	45	1.56	18.4911	83	0.783133	1.13	420	4.64	2.28545	1.6	0.96	4.59	1.00776	0.383023
唐文婷	66	0.8	1.62	110	70	4.42		23	47	1.6	18.3594	81	0.814815	1	389.6	3.44	1.45636	1.01	0.54	4.27	0.838818	0.395082
胡丽珠	66	0.7	1.64	94	60	5.12		27	41.5	1.58	16.6239	83	0.795181	1.2	361.9	5.17	3.21182	1.18	0.64	6.34	1.4427	0.36145
林吓丽	69	0.4	1.32	129	88	3.13		21	42.5	1.54	17.9204	81	0.851852	1.11	323.7	4.28	2.77818	1.09	0.58	9.36	1.30208	0.367364
魏婷婷	63	0.56	1.41	105	71	4.47		23	46.5	1.61	17.9391	84	0.75	1.22	349.8	4.47	2.80545	1.15	0.61	3.14	0.623813	0.416231
曾肖岩	69	1.01	1.67	114	72	3.29		30	49	1.66	17.782	83	0.831325	0.91	457.9	4.5	2.37091	1.09	0.69	5.98	0.874409	0.392285
陈爱清	63	1.09	1.29	85	50	3.68		30	44	1.6	17.1875	79	0.797468	0.91	137.1	3.42	1.63455	0.97	0.54	3.16	0.516836	0.430885
王云钦	64	0.53	1.43	120	84	4.9		24	39	1.53	16.6603	79	0.810127	0.75	304.5	4.06	2.38909	0.9	0.69	3.32	0.723022	0.405415
林美艳	61	0.48	1.39	124	74	3.88		27	43	1.53	18.369	79	0.772152	1.05	235.9	4.85	3.24182	1.34	0.71	3.47	0.598382	0.419387
周波弟	62	0.76	1.53	123	72	4.01		27	43	1.56	17.6693	76	0.815789	1.09	158.4	4.02	2.14455	1.27	0.62	1.06	0.188916	0.530864
付顺莲	62	0.68	1.09	91	57	4.54		20	43	1.55	17.898	82	0.756098	0.31	134.5	3.2	1.80091	0.9	0.48	2.66	0.536729	0.427861
林花田	61	0.5	1.5	116	67	4.25		22	49	1.66	17.782	83	0.73494	1.35	472.7	5.56	3.83273	0.88	0.75	3.74	0.706444	0.407078
黄淋芳	63	1.27	1.69	114	56	4.44		28	47	1.63	17.6898	82	0.768293	0.51	244.2	4.41	2.14273	0.85	0.57	6.27	1.23728	0.370381
陈细烟	63	1.48	1.99	120	71	4.92		23	41	1.54	17.2879	81	0.777778	0.68	99.1	5.84	3.17727	2.15	1.01	5.31	1.16112	0.374205
林莉萍	70	0.87	1.01	106	66	4.41		24	47.2	1.6	18.4375	84	0.833333	1.24	357.7	4.18	2.77455	0.85	0.63	3.96	0.77616	0.400415
陈敏	65	0.58	1.84	103	58	4.1		22	46	1.63	17.3134	82	0.792683	1	433.7	5.71	3.60636	0.96	0.69	1.25	0.227778	0.508915
李秀英	65	0.41	1.8	117	72	5.3		25	44	1.6	17.1875	77	0.844156	0.15	186.1	4.63	2.64364	0.65	0.47	3.07	0.723156	0.405402
陈婷婷	64	0.51	1.48	117	84	4.55		25	46	1.64	17.1029	77	0.831169	0.89	349.1	4.29	2.57818	1.01	0.52	3.61	0.730022	0.404729
黄均	76	1	0.95	100	70	4.69		33	50	1.54	21.0828	86.5	0.878613	1	127.6	4.39	2.98545	1.12	0.83	11.88	2.47632	0.333193
吴素珍	84	1.56	1.02	105	65	5.46		28	54	1.55	22.4766	92	0.913043	1.16	219.6	4.57	2.84091	1.58	0.99	27.97	6.78739	0.290769
吴如洪	80	1.02	0.87	100	60	4.69		27	50	1.58	20.0288	89	0.898876	1.62	180.4	3.87	2.53636	1.91	0.7	6.77	1.41117	0.362709
陈颖	75	1.07	0.99	108	63	4.29		21	55	1.68	19.487	88	0.852273	0.84	289.2	3.58	2.10364	1.2	0.64	5.71	1.08871	0.378162
陈章琴	78	0.59	1.68	100	60	4.04		26	53	1.56	21.7784	90	0.866667	2.61	427.7	3.62	1.67182	1.2	0.65	2.13	0.382453	0.456614
林慧冬	76	0.9	1.39	120	70	5.02		25	65	1.7	22.4913	85	0.894118	2.49	278.5	5.77	3.97091	1.82	0.96	3.22	0.718418	0.405872
潘美英	76	0.68	1.79	118	82	5.03		24	56	1.65	20.5693	89	0.853933	1.31	210	5.26	3.16091	1.1	0.99	6.52	1.45758	0.360869
张玲玲	77	1.41	1.1	115	72	4.74		28	54	1.6	21.0938	87	0.885057	1.03	209.4	6.15	4.40909	1.3	0.97	5.52	1.16288	0.374113
陈爱娇	69	1.24	0.92	110	70	4.46		27	46	1.52	19.91	78	0.884615	1.05	244	4.93	3.44636	1.31	0.86	7.93	1.5719	0.356649
吕莺	77	1.77	1.32	120	70	4.18		31	60	1.68	21.2585	94	0.819149	0.97	380.4	5.5	3.37545	1.66	0.97	4.91	0.912169	0.389479
郑桂香	80	1.84	1.14	110	70	4.47		27	58	1.59	22.9421	88	0.909091	0.9	319	4.34	2.36364	1.17	0.76	5.44	1.08075	0.378619
曾巧玲	73	1.36	1.72	100	65	4.38		25	55	1.6	21.4844	85	0.858824	0.76	192.2	5.03	2.69182	1.7	0.84	5.75	1.11933	0.376447
赵晓芳	75	0.57	1.79	115	65	4.49		32	54	1.6	21.0938	87	0.862069	1.12	189.1	3.65	1.60091	1.56	0.58	4.31	0.860084	0.393392
施成	73	0.3	1.57	115	65	5.1		20	63	1.66	22.8625	101	0.722772	1.01	233.1	3.75	2.04364	1.41	0.6	5.15	1.16733	0.373881
陈丽玉	70	0.34	1.77	122	75	4.42		22	48.5	1.59	19.1844	86	0.813953	1.29	266	4.64	2.71545	1.56	0.78	2.3	0.451822	0.442004
薛烨	75	1.29	1.5	116	76	5.53		27	56	1.63	21.0772	87	0.862069	0.8	301	3.89	1.80364	1.23	0.71	7.09	1.74256	0.351044
林珠金	73	0.43	1.55	124	79	4.82		27	50	1.48	22.8269	89	0.820225	1.08	152	5.07	3.32455	1.54	0.95	3.91	0.837609	0.395179
陈炎清	72	0.54	2.08	136	72	4.86		24	52	1.65	19.1001	85	0.847059	0.47	159.4	4	1.67455	1.47	0.63	6.55	1.4148	0.362562
林淋	64	0.44	1.17	119	70	4.69		21	48	1.58	19.2277	84	0.761905	0.78	167.4	4.39	3.02	1.18	0.74	9.78	2.03859	0.342843
郑静薇	97	1.38	1.54	119	82	5.15		22	66	1.7	22.8374	107	0.906542	0.9	315	3.24	1.07273	1.27	0.72	13.25	3.03278	0.323698
王华琴	73	1.92	1.45	120	82	4.81		26	60	1.67	21.5139	91	0.802198	0.85	242	4.94	2.61727	1.26	0.89	8.3	1.77436	0.350079
林雨露	69	0.75	2	113	68	5.22		23	49	1.55	20.3954	85	0.811765	0.2	191	5.04	2.69909	2	0.78	3.24	0.75168	0.402659
蔡小兰	85	1.72	1.44	131	80	4.16		28	65	1.7	22.4913	95	0.894737	1.15	295.2	5.05	2.82818	1.5	0.98	11.41	2.10958	0.341105
许建华	75	0.53	1.8	110	70	4.78		30	60	1.65	22.0386	87	0.862069	0.98	347.7	4.06	2.01909	1.41	0.6	3.11	0.660702	0.411953
陈凤舟	76	1.22	1.17	115	75	4.15		30	57	1.62	21.7193	85	0.894118	1.25	344.9	4.95	3.22545	1.03	0.9	4.57	0.842911	0.394752
江霞	80	0.6	1.21	106	73	4.35		26	64	1.68	22.6757	92	0.869565	0.4	173.2	5.4	3.91727	1.17	1.01	6.78	1.3108	0.366974
陈四兰	77	0.7	1.8	102	62	4.69		30	57	1.63	21.4536	91	0.846154	2.01	200.1	6.16	4.04182	1.6	0.63	11.74	2.44714	0.333766
林娜	73	0.96	1.54	119	73	4.5		25	45	1.52	19.4771	82	0.890244	1.12	385.1	5.17	3.19364	1.23	0.82	8.98	1.796	0.349435
曾于弼	73	0.6	1.15	114	71	4.97		30	47	1.58	18.8271	87	0.83908	0.6	241	5.64	4.21727	1.04	0.68	4.87	1.07573	0.378909
施恩	79	0.88	1.38	111	74	5.13		31	52	1.57	21.0962	89	0.88764	0.41	353.4	5.61	3.83	1.18	0.77	5.98	1.36344	0.364685
卢琳	73	0.69	1.01	110	75	4.37		22	52	1.57	21.0962	87	0.83908	0.78	265.3	4.31	2.98636	1.01	0.72	4.11	0.798253	0.398471
陈微	72	0.72	1.33	95	65	4.12		25	46.5	1.54	19.607	86	0.837209	0.87	411.8	4.78	3.12273	1.23	0.71	2.13	0.390027	0.454845
陈梦莹	64	0.69	1.57	98	60	3.88		21	50	1.6	19.5312	84	0.761905	0.79	190.4	3.89	2.00636	1.21	0.55	1.53	0.26384	0.492903
刘依妹	66	0.57	1.3	102	59	4.36		38	50	1.53	21.3593	83	0.795181	0.82	195.4	4.09	2.53091	1.14	0.62	6.95	1.34676	0.365398
郑婷婷	68	0.62	1.27	110	80	4.46		26	55	1.65	20.202	96	0.708333	1.6	82.1	4.18	2.62818	1.11	0.61	4.29	0.850373	0.394156
吴小轩	67	0.5	1.23	108	68	4.37		21	44	1.52	19.0443	81	0.82716	0.48	155.2	4.08	2.62273	1.07	0.61	2.65	0.514689	0.43122
黄嫩梅	69	2.79	0.95	115	65	5.4		27	51	1.6	19.9219	82	0.841463	0.59	202.3	3.76	1.54182	1.02	0.75	5.13	1.2312	0.370675
阮茜	78	1.67	1.5	112	80	4.64		29	53.5	1.57	21.7047	92	0.847826	1.18	382.5	6.29	4.03091	1.01	0.96	10.77	2.22101	0.338523
姜妍妍	77	0.57	1.16	120	80	4.3		27	59	1.72	19.9432	91	0.846154	1.37	336.4	3.91	2.49091	1.05	0.59	3.05	0.582889	0.4214
林喜雪	69	1.74	1.35	103	67	4.61		33	49	1.56	20.1348	80	0.8625	0.41	485.5	5.66	3.51909	1.01	0.88	2.98	0.610569	0.417852
丁雅华	74	1.24	1.58	104	71	4.45		27	54	1.62	20.5761	92	0.804348	1.23	235.9	5.32	3.17636	1	0.77	2.46	0.486533	0.435812
李丹楠	82	1.19	1.51	116	79	4.32		29	56	1.61	21.6041	91	0.901099	0.88	357.9	6.31	4.25909	1	0.9	5.95	1.1424	0.375196
李林妹	67	0.86	1.7	120	80	3.84		24	47	1.55	19.563	81	0.82716	0.95	352	5.23	3.13909	1.1	0.7	0.68	0.116053	0.598046
陈晶晶	71	0.82	1.78	118	70	3.59		20	54	1.64	20.0773	93	0.763441	1.36	729.7	4.36	2.20727	1.17	0.57	8.75	1.39611	0.363323
刘娟娟	75	0.54	1.49	114	65	4.84		28	59	1.65	21.6713	91	0.824176	0.31	326	3.67	1.93455	1.04	0.52	10.1	2.17262	0.339623
林丹娜	75	1.47	1.04	123	78	4.85		20	59	1.62	22.4813	95	0.789474	1.13	515	5.15	3.44182	1	0.79	16.28	3.50924	0.317192
郑洲	78	0.52	1.62	117	64	4.05		29	52	1.58	20.83	90	0.866667	0.99	275.8	3.91	2.05364	1.18	0.73	8.57	1.5426	0.357691
郑梅琴	75	1.73	1.34	119	78	4.14		28	50.5	1.57	20.4876	84	0.892857	0.44	433.2	5.72	3.59364	1.01	1.03	12.41	2.28344	0.337149
何娟娟	75	0.74	1.22	98	61	5.08		27	55	1.57	22.3133	88	0.852273	0.76	452.4	3.32	1.76364	1.1	0.75	4.14	0.93472	0.387877
尤金菊	77	0.7	1.93	127	88	3.91		25	54	1.6	21.0938	90	0.855556	1.36	315.5	4.49	2.24182	1.17	0.79	6.93	1.20428	0.371999
林冰娜	67	1.61	1.36	100	68	4.23		30	50	1.53	21.3593	81	0.82716	0.84	336.7	4.76	2.66818	0.84	1.03	8.27	1.55476	0.357255
吴敏	75	1.58	1.28	107	63	4.59		22	55	1.62	20.9572	85	0.882353	1.06	567.4	4.82	2.82182	0.83	0.84	13.49	2.75196	0.328181
周倩	59	0.72	1.56	116	71	4.61		22	46	1.52	19.91	81	0.728395	0.79	287.7	3.52	1.63273	1.01	0.54	3.96	0.81136	0.397351
林琼珊	61	0.67	1.2	95	62	4.68		25	49	1.56	20.1348	83	0.73494	0.81	373.1	4.61	3.10545	1.56	0.76	5.29	1.10032	0.377505
张莹	66	1.03	1.24	109	78	4.51		27	50.5	1.62	19.2425	88	0.75	1.13	375.7	3.84	2.13182	1.34	0.6	5.22	1.04632	0.380645
陈柳珠	68	0.89	1.1	121	87	4.12		27	45.5	1.5	20.2222	78	0.871795	1.04	224.6	3.43	1.92545	1.26	0.55	2.09	0.382702	0.456555
郑晓烨	68	0.8	1.29	106	69	3.32		20	57	1.7	19.7232	84	0.809524	0.66	295.8	4.01	2.35636	1.31	0.61	3.85	0.568089	0.423393
吴美选	70	1.92	1.43	123	76	4.62		27	51	1.58	20.4294	86	0.813953	1.15	279.7	5.41	3.10727	1.75	0.89	5.08	1.04309	0.380839
柳小青	64	1.38	1.24	108	71	4.33		23	50	1.55	20.8117	77	0.831169	0.75	373.9	4.08	2.21273	1.31	0.68	4.92	0.946827	0.387038
刘秀敏	66	1.3	1.36	116	68	4.97		27	43.6	1.51	19.122	83	0.795181	0.78	229.3	4.62	2.66909	1.47	0.72	17.2	3.79929	0.313759
李文梅	76	1.29	1.54	102	72	4.57		29	49	1.57	19.8791	87	0.873563	0.8	384.8	4.49	2.36364	1.05	0.77	2.4	0.487467	0.435654
黄晓萍	76	0.53	1.92	120	70	4.38		33	47.5	1.6	18.5547	90	0.844444	1.08	318.2	4.17	2.00909	1	0.6	1.12	0.218027	0.513884
林燕	71	0.78	1.28	106	76	4.51		27	47.5	1.54	20.0287	86	0.825581	0.84	202.2	5.01	3.37545	1.11	0.85	0.42	0.0841867	0.652444
何青青	71	0.75	1.38	122	72	4.57		20	55	1.67	19.721	86	0.825581	1.1	346.4	5.17	3.44909	1.13	0.82	6.52	1.32428	0.366376
谢铃影	67	0.38	1.41	114	76	5.36		28	50	1.52	21.6413	86	0.77907	1.47	432.2	4.57	2.98727	1.06	0.72	8.33	1.98439	0.344224
陈英英	82	0.74	1.22	123	85	5.06		24	59	1.63	22.2063	90	0.911111	0.74	429.2	4.11	2.55364	1.08	0.64	10.42	2.34334	0.335876
王倩	56	0.55	1.46	116	75	4.4		25	56	1.6	21.875	68	0.823529	0.92	386	4.15	2.44	0.94	0.7	10.24	2.00249	0.343758
黄海燕	73	1.32	1.06	110	57	4.37		26	49	1.5	21.7778	85	0.858824	0.4	266.1	5.51	3.85	1.31	1	6.42	1.24691	0.36992
林小平	80	0.97	1.14	105	76	6.6		28	60	1.62	22.8624	87	0.91954	0.7	88.5	5.32	3.73909	1.15	1.15	16.49	4.83707	0.303763
翁秀华	67	0.62	1.97	120	86	4.9		24	47	1.55	19.563	78	0.858974	0.72	336.9	5.83	3.57818	1.12	0.78	3.66	0.797067	0.398573
郑玲	74	1.13	2.35	117	76	6.14		29	48	1.55	19.9792	82	0.902439	0.45	195.3	6.14	3.27636	1.31	1.03	4.94	1.34807	0.365341
林婷	77	1.31	1.17	117	80	5.01		28	58	1.63	21.83	85	0.905882	1.06	268.3	4.1	2.33455	0.93	0.56	12.69	2.82564	0.32695
石开玉	72	1.06	1.15	119	70	4.81		30	47	1.52	20.3428	85	0.847059	0.59	313.6	4.92	3.28818	1.12	0.8	7.08	1.51355	0.358751
林明艳	72	1.32	1.52	121	83	4.72		27	48.5	1.53	20.7185	84	0.857143	0.54	296	5.43	3.31	1.16	0.84	5.34	1.12021	0.376399
陈烨	74	0.77	1.79	111	61	4.42		26	48	1.55	19.9792	82	0.902439	1.4	540.6	4.67	2.53	2.2	0.92	6.76	1.32796	0.366214
陈晓君	73	0.79	1.43	110	64	4.72		32	45.6	1.53	19.4797	84	0.869048	1.5	372.2	4.57	2.78091	1	0.6	1.71	0.35872	0.46249
吴文英	72	1.56	1.22	111	73	5		29	42	1.45	19.9762	81	0.888889	0.49	259.8	4.42	2.49091	0.9	0.69	6.14	1.36444	0.364643
方丽随	66	0.45	1.59	121	69	4.79		26	49	1.6	19.1406	81	0.814815	0.63	154.4	4.82	3.02545	0.9	0.64	4.74	1.00909	0.382938
林贤妹	68	0.89	1.18	107	64	4.8		30	45	1.48	20.5442	77	0.883117	0.6	136.7	4.42	2.83545	0.86	0.62	5.62	1.19893	0.372266
刘晓丹	74	0.58	1.29	122	83	5.45		24	50.1	1.52	21.6846	84	0.880952	0.54	280.1	5.49	3.93636	0.97	0.71	4.28	1.03671	0.381226
许亚珊	80	0.8	0.98	121	74	4.5		25	54	1.59	21.3599	90	0.888889	1.19	416.5	5.23	3.88636	1.03	0.84	8.69	1.738	0.351185
尹艳	65	1.03	1.26	125	84	4.92		25	48.9	1.61	18.865	79	0.822785	1.18	408.9	4.42	2.69182	1.13	0.68	4.3	0.940267	0.387491
陈荔娟	74	1.53	1	105	75	4.83		23	48.5	1.46	22.7529	85	0.870588	1.21	367.4	3.4	1.70455	0.58	1.2	3.04	0.652587	0.412866
江慧芳	78	1.23	1.17	103	77	4.54		29	56.5	1.61	21.797	94	0.829787	0.89	235.3	5.75	4.02091	1.22	0.94	4.26	0.859573	0.393432
郑瑾	72	0.5	1.52	114	68	5.1		31	52.5	1.66	19.0521	88	0.818182	1.05	270.4	4.27	2.52273	0.95	0.51	5.3	1.20133	0.372146
张文敏	76	0.82	1.22	116	71	4.76		24	55	1.61	21.2183	87	0.873563	1.29	276.8	3.3	1.70727	0.65	0.45	5.67	1.19952	0.372237
王磊	79	1.59	1.16	109	65	4.77		30	58	1.65	21.3039	95	0.831579	0.81	201.1	6.27	4.38727	1.35	1.01	2.7	0.5724	0.422805
蔡丹丹	77	1.64	1.03	129	78	4.84		21	55	1.57	22.3133	89	0.865169	0.42	234.5	4.55	2.77455	1.21	0.79	5.96	1.28206	0.368275
曾美兰	76	0.77	1.29	94	57	4.78		22	57	1.62	21.7193	86	0.883721	0.86	345.9	4.04	2.4	1	0.53	5.29	1.12383	0.376201
俞露	87	1.15	1.11	124	66	4.74		33	59	1.62	22.4813	97	0.896907	0.69	252	5.11	3.47727	0.97	0.8	4.74	0.99856	0.383608
林丽萍	70	1.78	1.23	120	84	3.71		22	52	1.59	20.5688	90	0.777778	0.85	256.7	5.23	3.19091	1.37	0.89	4.5	0.742	0.403574
吴艳玲	73	3.42	0.99	106	64	5.22		26	51	1.59	20.1733	89	0.820225	0.84	292	5.59	3.04545	1.54	1.11	10.41	2.41512	0.334404
范晓婕	86	0.86	1.05	105	60	3.62		27	60	1.58	24.0346	98	0.877551	0.9	291.2	3.45	2.00909	1.01	0.63	8.7	1.39973	0.363174
张小燕	85	1.15	0.99	110	70	5.15		26	63	1.6	24.6094	97	0.876289	0.87	374.1	4.32	2.80727	1.34	0.79	12.71	2.90918	0.325603
林淑君	82	0.87	1.21	110	70	4		26	63	1.62	24.0055	91	0.901099	1.55	343.7	3.32	1.71455	1.35	0.62	8.06	1.43289	0.361838
林升	82	0.8	1.42	100	93	4.64		20	65	1.62	24.7676	97	0.845361	0.84	448.1	4.98	3.19636	2.21	0.86	5.06	1.04348	0.380816
卢娟	80	2.76	0.98	120	80	5.15		27	54	1.53	23.0681	90	0.888889	0.86	145.6	5.55	3.31545	1.02	0.95	8.17	1.87002	0.347306
吴芳	85	0.52	2.19	110	73	5.2		22	63	1.6	24.6094	97	0.876289	0.49	262.6	5.95	3.52364	1.82	0.91	4.14	0.9568	0.386358
李讷	82	1.03	1.87	110	70	4.85		25	63	1.62	24.0055	91	0.901099	1.55	160.2	5.11	2.77182	1.86	0.8	5.2	1.12089	0.376362
李玲玲	85	0.5	1.24	115	92	5.04		23	62	1.58	24.8358	94	0.904255	1.08	135.7	4.17	2.70273	1.07	0.81	7.27	1.62848	0.354706
兰榕军	81	1.51	1.62	118	80	4.62		27	59	1.6	23.0469	95	0.852632	1.18	241.1	5.96	3.65364	1.94	0.93	9.4	1.93013	0.345657
陈艺莹	81	2.09	1.39	110	70	4.64		28	53	1.5	23.5556	88	0.920455	0.78	228.3	6.62	4.28	1.69	1.18	18.11	3.73468	0.314494
黄晓丹	80	1.47	1.27	131	83	4.47		24	60	1.61	23.1473	92	0.869565	1.5	472.4	5.57	3.63182	1.58	1.04	7.59	1.50788	0.358961
沈珊	78	0.64	2.33	125	60	4.85		34	57	1.56	23.4221	95	0.821053	0.75	336.1	5.11	2.48909	1.88	0.88	8.34	1.79773	0.349384
柯素云	80	2.22	1.12	114	73	4.33		27	58	1.56	23.833	95	0.842105	0.96	239.1	4.83	2.70091	1.11	0.85	7.96	1.53186	0.35808
林霞	78	1.38	1.13	114	69	5.03		30	55	1.54	23.1911	85	0.917647	0.94	146.7	5	3.24273	1.03	0.78	4.38	0.979173	0.384865
陈依妹	82	1.82	1.17	108	77	4.75		35	64	1.63	24.0882	97	0.845361	0.58	242.3	4.38	2.38273	1.09	0.79	12.14	2.56289	0.331545
陈新颖	80	0.48	1.45	121	72	4.61		20	63	1.64	23.4236	95	0.842105	1.08	182.8	4	2.33182	1.07	0.62	2.07	0.42412	0.447439
元美玲	81	1.11	1.77	113	77	4.44		23	64	1.63	24.0882	94	0.861702	0.88	487.9	4.71	2.43545	1.13	0.63	13.46	2.65611	0.329848
陈小青	75	1.24	1.53	116	67	5.03		28	56	1.55	23.3091	88	0.852273	1.19	426	5.47	3.37636	0.91	0.76	17.15	3.83398	0.313371
郑国玉	75	1.03	1.96	122	71	4.79		38	58	1.55	24.1415	88	0.852273	1.01	239.8	6.66	4.23182	1.45	1.2	3.05	0.649311	0.413239
许美容	78	0.67	1.38	114	60	5.62		26	60.5	1.6	23.6328	90	0.866667	0.66	342.7	3.96	2.27545	1.24	0.82	4.97	1.2414	0.370183
胡佳茜	78	1.08	1.66	103	66	3.99		23	60.5	1.62	23.0529	90	0.866667	1.75	432.5	5.49	3.33909	1.24	0.97	4.54	0.805093	0.397883
林雪芬	77	1.31	1.59	130	82	4.13		26	58.5	1.55	24.3496	89	0.865169	1.03	296.9	5.51	3.32455	1.36	1.02	9.24	1.69605	0.352498
徐华	80	1.2	1.58	119	80	4.03		30	57	1.56	23.4221	90	0.888889	1.09	354.8	4.96	2.83455	1.34	0.85	10.95	1.96127	0.344829
赵苏	74	1.03	1.53	101	69	3.81		27	61.5	1.61	23.7259	89	0.831461	1.26	416.7	6.43	4.43182	1.47	0.91	2.21	0.374227	0.458592
陈秋榕	79	1.28	1.29	110	63	4.68		27	58.5	1.53	24.9904	92	0.858696	1.33	536.4	4.2	2.32818	1.03	0.88	6.1	1.2688	0.368888
胡雅娟	67	0.62	1.23	117	71	4.38		28	58	1.58	23.2335	89	0.752809	0.91	260.7	3.64	2.12818	1.13	0.61	3.34	0.650187	0.413139
张沁心	82	0.71	1.13	112	77	4.34		20	65	1.63	24.4646	89	0.921348	1.39	552.5	4.33	2.87727	0.95	0.72	10.65	2.05427	0.342453
吴舒均	80	1.96	1.22	119	80	4.27		21	65	1.62	24.7676	89	0.898876	1.01	743.5	4.76	2.64909	1.14	0.86	6.2	1.17662	0.3734
温小兰	82	2.35	0.97	120	80	3.42		31	58	1.56	23.833	88	0.931818	1.03	215.5	4.11	2.07182	1.64	0.76	5.62	0.85424	0.39385
乔宇	87	1.17	1.13	107	56	4.79		30	60	1.6	23.4375	90	0.966667	0.83	160	5.63	3.96818	1.2	0.92	23.87	5.08166	0.301799
黄新英	84	0.96	1.31	117	67	4.56		29	60.2	1.6	23.5156	90	0.933333	0.75	229.2	5.85	4.10364	1.3	0.92	12.11	2.45429	0.333625
刘霞	83	0.69	1.07	113	78	4.62		26	58	1.58	23.2335	87	0.954023	1.19	335.3	4.61	3.22636	0.8	0.66	3.89	0.798747	0.398428
陈碧珍	82	1.31	1.8	103	64	4.94		25	58	1.56	23.833	90	0.911111	0.92	409.2	6.23	3.83455	1.43	0.9	6.14	1.34807	0.365341
俞丽云	78	0.6	0.75	108	70	5.33		23	60	1.58	24.0346	90	0.866667	0.77	324	2.99	1.96727	0.67	0.5	1.84	0.435876	0.445074
林萍	82	1.09	1.16	109	73	5.7		31	62	1.6	24.2188	94	0.87234	0.61	229.2	4.61	2.95455	1	0.75	21.95	5.56067	0.298278
刘雅双	89	2.12	1.12	129	71	6.15		28	58	1.55	24.1415	90	0.988889	0.69	292.5	5.89	3.80636	1.41	1.06	10.8	2.952	0.324932
蒋婷	82	2.26	0.95	104	61	5.21		32	61	1.57	24.7475	93	0.88172	0.57	180.2	4.93	2.95273	1.26	1.32	9.25	2.14189	0.340338
黄桂芳	98.5	1.99	0.78	121	87	6.16		26	80	1.69	28.0102	101	0.975248	0.85	391.4	5.57	3.88545	1.3	0.99	24.02	6.57614	0.291934
林丽花	87	1.57	1.16	121	85	4.71		33	67	1.58	26.8386	94	0.925532	0.8	356.2	4.48	2.60636	1.19	0.78	12.57	2.63132	0.330291
陈宝英	106	0.65	1.14	110	68	4.81		27	76	1.6	29.6875	107	0.990654	0.66	145.6	4.94	3.50455	1.74	1.05	17.69	3.78173	0.313957
温跃青	90	1.36	1.05	120	80	4.1		30	65	1.6	25.3906	98	0.918367	0.87	297.1	5.14	3.47182	1.45	1.1	12.26	2.23404	0.338232
沈云	104	2.44	0.93	100	60	4.71		31	75	1.55	31.2175	109	0.954128	0.83	266.4	4.98	2.94091	1.26	1.01	11.99	2.50991	0.332545
丁宁	80	0.58	1.14	100	70	4.65		27	66	1.58	26.4381	96	0.833333	1.2	497.4	4.99	3.58636	1.44	1.01	16.95	3.503	0.317269
郑秀英	90	1.07	1.97	115	80	3.7		33	71.5	1.57	29.0073	95	0.947368	1.38	386.6	4.5	2.04364	1.58	0.68	10.32	1.69707	0.352466
张晓华	91	0.82	1.67	100	60	5.79		32	66	1.6	25.7812	100	0.91	1.2	250.8	6.13	4.08727	1.48	1.16	17.6	4.52907	0.306423
卢湘玉	86	2.23	0.97	100	70	5.07		31	72.5	1.63	27.2874	96	0.895833	0.81	416.8	5.33	3.34636	1.2	1.08	12.29	2.76935	0.327887
王舒婷	90	0.84	1.18	120	75	5.03		20	66	1.55	27.4714	100	0.9	0.68	220.9	5.17	3.60818	1.01	0.78	12.77	2.8548	0.326474
林立	83	1.16	0.9	104	63	3.97		26	57	1.48	26.0226	89	0.932584	0.81	173	5.94	4.51273	1.51	1.01	11.84	2.0891	0.341598
张勤	84	1.9	1.24	125	75	4.73		30	67.5	1.64	25.0967	99	0.848485	0.76	273.8	4.99	2.88636	1.56	0.93	6.31	1.3265	0.366278
张春梅	83	1.4	1.23	133	86	4.89		26	65	1.59	25.711	95	0.873684	0.87	262.2	4.03	2.16364	1.09	0.88	8.6	1.86907	0.347333
魏建萍	81	1.36	1.01	118	71	5.23		28	63	1.58	25.2363	95	0.852632	0.89	308.1	3.38	1.75182	1.04	0.69	8.72	2.02692	0.343137
孙惠娟	95	2	1.34	115	70	5.29		25	92	1.7	31.8339	109	0.87156	0.81	240.5	5.62	3.37091	1.24	1	23.59	5.54627	0.298378
何风云	90	1.05	2.8	127	80	4.06		22	78	1.65	28.6501	107	0.841121	1.31	222.7	6.14	2.86273	2.24	0.97	6.47	1.16748	0.373873
王晓英	88	1.77	0.94	131	83	4.61		21	71	1.55	29.5525	98	0.897959	1.24	150.6	4.16	2.41545	0.97	0.75	12.03	2.46481	0.333418
丘玉清	82	2.66	1.3	140	85	6.59		28	61	1.56	25.0657	94	0.87234	0.72	293.5	6.41	3.90091	1.11	0.94	21.56	6.31468	0.293444
卢丽峰	110	2.47	1.61	110	85	4.49		31	83	1.7	28.7197	120	0.916667	0.86	105.9	4.89	2.15727	1.78	0.89	12.7	2.53436	0.33208
卓小英	102	2.37	1.09	110	75	4.49		28	84	1.65	30.854	112	0.910714	1.52	306.6	4.21	2.04273	1.1	0.77	9.96	1.98757	0.344142
肖玉贞	86	1.58	1.33	114	73	4.76		34	57	1.48	26.0226	95	0.905263	0.99	430.5	5.33	3.28182	1.09	1.16	6.88	1.4555	0.36095
潘燕萍	85	1.72	1.22	101	67	3.95		28	67	1.6	26.1719	96	0.885417	0.84	146.8	4.82	2.81818	1.13	1.01	14.32	2.51396	0.332468
王滢滢	90	0.62	1.19	130	80	5.45		24	70	1.67	25.0995	94	0.957447	0.74	394.3	3.2	1.72818	1	0.69	15.75	3.815	0.313583
杨秀焰	110	1.02	1.2	118	71	2.56		27	71	1.59	28.0843	115	0.956522	1.1	341.1	5.34	3.67636	0.87	1.06	8.69	0.988729	0.384241
蔡首燕	111	1.01	1.13	114	68	4.44		24	79	1.67	28.3266	124	0.895161	0.5	252.5	4.5	2.91091	0.83	0.94	10.42	2.05621	0.342404
林雍	86	1.28	1.04	138	92	4.97		32	85.5	1.66	31.0277	107	0.803738	0.82	143.1	4.27	2.64818	1.57	0.75	14.05	3.10349	0.322653
程华莺	77	1.45	0.96	121	74	6.95		26	73	1.67	26.1752	97	0.793814	0.89	215.7	4.5	2.88091	0.83	0.94	16.7	5.15844	0.301207
陈淑娟	89	2.87	0.83	112	79	4.65		26	76	1.62	28.959	104	0.855769	1.04	160.41	5.39	3.25545	1.6	1.05	14.91	3.0814	0.322976
赖玉琴	99	1.56	0.91	109	71	4.87		34	70	1.6	27.3438	108	0.916667	0.65	138.2	4.14	2.52091	1.6	0.75	4.09	0.885258	0.391462
汪文玲	88	1.5	0.99	123	63	5.15		22	78	1.65	28.6501	105	0.838095	0.78	361.1	4.07	2.39818	1.41	0.64	12.81	2.93207	0.325243
郭宝贞	80	0.96	1.16	119	77	5.46		35	60.5	1.55	25.1821	91	0.879121	1.02	535.4	4	2.40364	1.41	0.65	5.67	1.37592	0.36416
李晓英	73	2.89	1.74	125	80	3.8		28	59.5	1.53	25.4176	89	0.820225	0.92	262.1	5.23	2.17636	1	1.18	7.54	1.27342	0.368673
蔡敏璇	84	0.89	0.97	105	71	3.74		22	74.4	1.62	28.3493	99	0.848485	0.78	157.1	3.84	2.46545	1.39	0.61	19.66	3.26793	0.320335
江碧辉	85	2.14	0.88	121	78	4.98		25	69	1.55	28.7201	96	0.885417	0.72	219.8	5.52	3.66727	1.6	0.97	10.75	2.37933	0.335131
魏丽娇	88	0.81	1.46	113	79	4.77		33	74	1.69	25.9095	103	0.854369	0.9	277.8	5	3.17182	1.09	0.79	3.71	0.78652	0.399494
吕淑艳	87	2.68	1.43	108	64	5.94		29	64	1.59	25.3155	97	0.896907	1.43	246.5	5.38	2.73182	1.2	0.61	16.67	4.40088	0.307598
林晨舒	106	1.03	1.21	121	76	4.64		24	85	1.72	28.7317	120	0.883333	0.92	384.4	6.69	5.01182	1.35	1.06	6.9	1.42293	0.362235
兰兰香	93	0.72	1.45	114	66	5.04		24	72	1.62	27.4348	95	0.978947	0.87	167.9	4.86	3.08273	1.04	0.74	12.89	2.88736	0.32595
杨帆	84	0.84	1.07	116	85	4.61		28	74	1.6	28.9062	102	0.823529	0.72	437.9	4.28	2.82818	1.16	0.7	17.71	3.62858	0.315737
卓美娇	90	0.98	1.52	119	77	3.84		20	71	1.63	26.7229	95	0.947368	1.55	363.3	4.7	2.73455	1.1	0.77	4.65	0.7936	0.398874
陈妹妹	90	2.28	0.67	108	67	4.19		30	69.5	1.6	27.1484	92	0.978261	1.05	160.4	4.22	2.51364	1.14	0.87	24.12	4.49168	0.306761
赖婷婷	90	1.46	1.62	110	78	4.5		30	70	1.58	28.0404	93	0.967742	0.75	155.6	4.63	2.34636	0.99	0.7	5.63	1.126	0.376082
冯琳	98	1.04	1.13	131	89	4.08		32	85	1.64	31.6032	109	0.899083	0.57	188.6	5.29	3.68727	1.29	0.93	2.73	0.49504	0.434387
陈惠	84	2.12	0.9	127	89	4.84		25	67.6	1.63	25.4432	93	0.903226	0.69	439.9	4.13	2.26636	1	0.81	11.54	2.48238	0.333075
李花	90	1.72	0.9	96	75	5.22		31	80	1.61	30.863	110	0.818182	0.82	261.7	4.42	2.73818	1.23	0.97	20.77	4.81864	0.303916
林群	85	2.9	0.61	114	80	4.82		23	69	1.55	28.7201	96	0.885417	0.32	248.4	3.98	2.05182	1.18	0.93	14.36	3.07623	0.323052
陈玲	86	2.1	0.86	132	89	5.23		23	60.9	1.55	25.3486	93	0.924731	0.75	426.8	5.1	3.28545	1.13	0.9	8.89	2.06643	0.342152
江敏燕	96	1.24	0.9	137	89	4.74		28	77	1.63	28.9811	108	0.888889	0.88	318.2	4.01	2.54636	1.02	0.66	14.56	3.06731	0.323184
连碧仙	100	1.11	0.83	118	78	5.19		22	80	1.61	30.863	110	0.909091	0.68	142.7	3.53	2.19545	0.91	0.66	7.89	1.81996	0.348734
张莹	85	2.46	0.86	128	93	5.2		27	70.8	1.57	28.7233	100	0.85	0.97	532.3	3.5	1.52182	1.09	0.76	8.79	2.03147	0.343022
施琼梅	85	1.53	1.02	137	100	5.4		35	69	1.57	27.993	97	0.876289	1.13	407.9	3.99	2.27455	1.02	0.77	10.86	2.6064	0.330743
张华	96	3.61	0.9	124	85	6.06		26	67	1.54	28.251	96	1	0.84	230.5	6.3	3.75909	1.55	1.32	12.6	3.3936	0.318663
total	200	41	0.205	20.5
underweight	19	0	0	0
normal weight	92	4	0.0434783	4.34783
overweight	37	10	0.27027	27.027
obesity	52	27	0.519231	51.9231
